# Supplementary material for: Anti-Adhesion and Antibiofilm Activity of Eruca sativa Miller Extract Targeting Cell Adhesion Proteins of Food-Borne Bacteria as a Potential Mechanism: Combined In Vitro-In Silico Approach
Source: MDPI journal article supplement (doi:10.3390/plants11050610), 2022-02-24
Supplement: s1 [file s1]

**Table (S2).** Interacting active site residues of receptors with different antibiofilm phytochemical constituents.

| Receptor–ligand                                | Receptor ligand interactions      | Distance in angstroms | Receptor–ligand           | Receptor ligand interactions  | Distance in angstroms |
|------------------------------------------------|-----------------------------------|-----------------------|---------------------------|-------------------------------|-----------------------|
| <b>1T2P-Artomunoxanthentri<br/>one epoxide</b> | (ASN38) HD21-O (Ligand)           | 2.58                  | <b>1X0U-Rutin</b>         | (ILE205) Pi-Alkyl interaction | 4.25                  |
|                                                | (ARG65) HH21-O (Ligand)           | 2.86                  |                           | (ILE205) Pi-Alkyl interaction | 5.14                  |
|                                                | (ARG65) HH11-O (Ligand)           | 2.05                  |                           | (AGLU441) OE1-Pi interaction  | 4.25                  |
|                                                | (ARG65) HH11-O (Ligand)           | 2.43                  |                           | (THR438) HG1-O (Ligand)       | 2.30                  |
|                                                | (TYR15) HH-O (Ligand)             | 2.43                  |                           | (GLY136) O-H (Ligand)         | 2.59                  |
|                                                | (ASP125) OD2-C (Ligand)           | 3.58                  |                           | (ALA138) HN-H (Ligand)        | 2.69                  |
|                                                | (ASP126) HN-O (Ligand)            | 2.57                  |                           | (ALA175) O-H (Ligand)         | 3.00                  |
|                                                | (ASP126) OD2-C (Ligand)           | 3.58                  |                           | (ALA175) O-H (Ligand)         | 2.52                  |
| <b>1T2P-Pheophorbide<br/>a</b>                 | (ASN67) HD22-O (Ligand)           | 2.45                  |                           | (GLY177) HN-O (Ligand)        | 2.11                  |
|                                                | (GLU17) OE1-H (Ligand)            | 2.46                  |                           | (GLY371) CA -O (Ligand)       | 2.85                  |
|                                                | (LYS24) HZ1-O (Ligand)            | 2.20                  |                           | (TYR372) HN-O (Ligand)        | 2.38                  |
|                                                | (THR90) HN-O (Ligand)             | 2.07                  |                           | (PRO370) O-O (Ligand)         | 2.85                  |
|                                                | (THR90) HN-O (Ligand)             | 2.37                  |                           | (GLY439) HN-O (Ligand)        | 2.74                  |
|                                                | (LYS92) HZ1-O (Ligand)            | 2.20                  |                           | (GLU204) OE2-O (Ligand)       | 2.72                  |
|                                                | (LYS92) NZ -pi Cation interaction | 4.14                  | <b>1X0U-Sciadopitysin</b> | (ARG512) Pi-Alkyl interaction | 4.85                  |
|                                                | (GLU89) OE1-H (Ligand)            | 2.97                  |                           | (ARG512) Pi-Alkyl interaction | 3.89                  |

|                                    |                                                             |      |                         |                                                    |      |
|------------------------------------|-------------------------------------------------------------|------|-------------------------|----------------------------------------------------|------|
|                                    | (ASP22) OD1 -<br>pi anion<br>interaction                    | 3.20 |                         | (ARG512) Pi-<br>Alkyl<br>interaction               | 5.42 |
|                                    | (ASP22) OD1 -<br>pi Anion<br>interaction                    | 3.48 |                         | (LYS516 Pi-<br>Alkyl<br>interaction                | 4.69 |
| <b>1T2P-Pyrafoline D</b>           | (TYR127)<br>phenyl ring-<br>CC (Ligand)<br>(Pi- interaction | 4.11 |                         | (LYS516) CE-<br>O (Ligand)                         | 3.38 |
|                                    | (PRO34)<br>Alkyl-CC<br>(Ligand)                             | 4.40 |                         | (LYS516) O-C<br>(Ligand)                           | 3.77 |
|                                    | (ASN38)<br>HD21-OC<br>(Ligand)                              | 2.29 |                         | (THR398)<br>HG1-O<br>(Ligand)                      | 2.76 |
|                                    | (TRP134) pi-pi<br>interaction                               | 5.63 |                         | (GLU396) O-C<br>(Ligand)                           | 3.49 |
|                                    | (TRP134) pi-pi<br>interaction                               | 5.87 |                         | (GLU396)<br>OE2-C<br>(Ligand)                      | 3.68 |
|                                    | (PHE62) pi-pi<br>interaction                                | 4.66 |                         | (TYR392) Pi-<br>Alkyl -C<br>(Ligand)               | 4.98 |
|                                    | (PHE62) pi-pi<br>interaction                                | 4.36 |                         | (VAL158)<br>Alkyl-C<br>(Ligand)                    | 5.34 |
|                                    | (TYR15) Pi-<br>Alkyl<br>interaction                         | 5.47 |                         | (LYS515) Pi-<br>Alkyl<br>interaction               | 4.34 |
|                                    | (TYR15)<br>phenyl ring-<br>CC (Ligand)<br>Pi- interaction   | 5.11 |                         | (LYS515) Pi-<br>Alkyl<br>interaction               | 4.66 |
|                                    | (LYS24) - C<br>(Ligand) Pi<br>alkyl<br>interaction          | 3.85 |                         | (TYR513) O-H<br>(Ligand)                           | 2.95 |
| <b>1T2P-<br/>Pyropheophorbidea</b> | (LYS136) NZ-<br>Pi interaction                              | 4.94 | <b>1X0U-Terminaline</b> | (ILE446)<br>Alkyl-Alkyl<br>interaction<br>(Ligand) | 4.82 |
|                                    | (ASP125) OD2-<br>Pi interaction                             | 3.76 |                         | (GLY411) CA-<br>O (Ligand)                         | 3.30 |
|                                    | (ASP126) OD2-<br>HN (Ligand)                                | 2.33 |                         | (GLY412) HN-<br>O (Ligand)                         | 2.43 |

|                   |                                                      |      |                         |                              |      |
|-------------------|------------------------------------------------------|------|-------------------------|------------------------------|------|
|                   | (ASP126) OD2-HN (Ligand)                             | 2.33 | <b>1X0U-Thalidasine</b> | (GLY412) HN-O (Ligand)       | 2.11 |
|                   | (ASP126) OD2-HN (Ligand)                             | 2.18 |                         | (GLU204) OE1-C (Ligand)      | 3.56 |
|                   | (ASP126) OD2-H (Ligand)                              | 2.56 |                         | (MET159) Alkyl-C (Ligand)    | 4.17 |
|                   | (ASP126) OD1-Pi interaction                          | 3.72 |                         | (TYR513) Pi-Alkyl-C (Ligand) | 4.97 |
|                   | (ASP64) HN-O (Ligand)                                | 2.61 |                         | (LYS420) O-C (Ligand)        | 3.78 |
|                   | (ILE63) HN-O (Ligand)                                | 2.34 |                         | (GLU120) OE1-Pi interaction  | 4.67 |
|                   | (ARG65) HH12-O (Ligand)                              | 2.42 |                         | (GLU120) OE1-C (Ligand)      | 3.68 |
|                   | (PHE62) phenyl ring-CC (Ligand) Pi-Sigma interaction | 3.89 |                         | (GLU120) OE1- Pi interaction | 4.12 |
| <b>1T2P-Rutin</b> | (ARG65) HH21-O (Ligand)                              | 2.32 | <b>1X0U-Trilobolide</b> | (GLY442) CA-O (Ligand)       | 3.51 |
|                   | (ARG65) HH21-H (Ligand)                              | 2.66 |                         | (TYR196) Pi-Alkyl-C (Ligand) | 5.24 |
|                   | (TYR68) HH-H (Ligand)                                | 2.39 |                         | (PHE199) Pi-Alkyl-C (Ligand) | 4.90 |
|                   | (ASN38) HD22-O (Ligand)                              | 2.70 |                         | (PHE216) Pi-Alkyl-C (Ligand) | 4.56 |
|                   | (ASN38) HD21-H (Ligand)                              | 1.01 |                         | (ALA175) Alkyl-C (Ligand)    | 3.99 |
|                   | (GLU129) OE1-Pi interaction                          | 4.59 |                         | (THR438) HG1-O (Ligand)      | 2.56 |
|                   | (LYS146) OXT-HC (Ligand)                             | 2.43 |                         | (TYR372) HN-O (Ligand)       | 2.24 |
|                   | (TYR127) CB-Pi-Sigma interaction                     | 3.63 |                         | (GLY371) CA-O (Ligand)       | 3.12 |

|                           |                             |      |                                |                                    |      |
|---------------------------|-----------------------------|------|--------------------------------|------------------------------------|------|
|                           | (ASP126) HN-O (Ligand)      | 3.09 | <b>3FHU-Pheophorbide a</b>     | (ALA63) O-H (Ligand)               | 2.44 |
|                           | (ASP126) OD2-H (Ligand)     | 2.46 |                                | (THR40) CB-O (Ligand)              | 3.57 |
|                           | (ASP64) OD1-H (Ligand)      | 1.96 |                                | (TRP66) Pi-Pi interaction (Ligand) | 5.40 |
|                           | (ASP125) OD1-H (Ligand)     | 2.13 |                                | (TRP66) Pi-Alkyl interaction       | 4.94 |
| <b>1T2P-Sciadopitysin</b> | (ASN38) HD21-O (Ligand)     | 1.85 |                                | (GLN72) HE22-O (Ligand)            | 2.40 |
|                           | (ARG65) HH21-H (Ligand)     | 2.03 |                                | (GLN72) OE1-H (Ligand)             | 2.31 |
|                           | (PHE62) Pi-Pi interaction   | 5.46 |                                | (GLN72) OE1-HN (Ligand)            | 2.31 |
|                           | (PHE62) CA - O (Ligand)     | 3.10 |                                | (GLN72) OE1-Pi interaction         | 2.00 |
|                           | (ILE63) HN-O (Ligand)       | 2.54 |                                | (GLN72) OE1-HN (Ligand)            | 2.16 |
|                           | (ASP125) OD1-Pi interaction | 3.89 |                                | (GLN72) OE1-HN (Ligand)            | 2.29 |
|                           | (ASP125) OD1-Pi interaction | 4.63 |                                | (VAL74) Pi-Alkyl interaction       | 5.02 |
|                           | (ASP125) OD2-H (Ligand)     | 2.41 |                                | (LYS95) Alkyl-C (Ligand)           | 4.30 |
|                           | (TYR15) Pi-Pi interaction   | 5.90 | <b>3FHU-Pyropheophorbide a</b> | (ALA76) Alkyl-C (Ligand)           | 3.69 |
|                           | (TYR15) Pi-Pi interaction   | 5.56 |                                | (VAL74) Alkyl-C (Ligand)           | 3.96 |
|                           | (ASP126) OD2-Pi interaction | 4.86 |                                | (THR92) HG1-Pi interaction         | 3.10 |
|                           | (ASP126) OD2-Pi interaction | 4.00 |                                | (VAL151) Alkyl-C (Ligand)          | 4.73 |
|                           | (PRO26) Alkyl-C (Ligand)    | 4.36 |                                | (ASN94) OD1-H (Ligand)             | 2.96 |
|                           | (LYS85) HZ3-O (Ligand)      | 2.29 |                                | (THR149)HG1 (Ligand)               | 3.11 |
| <b>1T2P-Thalidasine</b>   |                             |      |                                |                                    |      |

|                                              |                               |      |                                                    |                                    |      |
|----------------------------------------------|-------------------------------|------|----------------------------------------------------|------------------------------------|------|
|                                              | (TYR15) HH-O (Ligand)         | 2.79 | <b>3FHU-<br/>Sciadopitysin</b>                     | (THR149) OG1-H (Ligand)            | 1.74 |
|                                              | (TYR15) Pi-Sigma-CC (Ligand)  | 3.75 |                                                    | (GLY81) HN-O (Ligand)              | 2.89 |
|                                              | (LYS24) Alkyl-CC (Ligand)     | 4.66 |                                                    | (GLY84) O-H (Ligand)               | 2.14 |
|                                              | (LYS24) Pi-Alkyl Interaction  | 5.48 |                                                    | (ASN86) HD22- Pi interaction       | 2.37 |
|                                              | (PRO26) Pi-Alkyl Interaction  | 4.83 |                                                    | (ASP78) OD2-H (Ligand)             | 2.50 |
|                                              | (TYR15) Pi-Pi interaction     | 5.50 |                                                    | (VAL151) CG1- Pi interaction       | 3.82 |
| <b>1X0U-1,4-Dimethoxyglucobras<br/>sicin</b> | (GLY412) HN-O (Ligand)        | 2.10 |                                                    | (VAL151) CG2- Pi-Sigma interaction | 3.57 |
|                                              | (GLY412) HN-O (Ligand)        | 2.12 |                                                    | (LYS118) Alkyl-C (Ligand)          | 4.94 |
|                                              | (THR438) OG1-OC (Ligand)      | 2.96 |                                                    | (ASN120) O-C (Ligand)              | 3.78 |
|                                              | (GLY439) HN-O (Ligand)        | 2.17 |                                                    | (THR92) HG1-H (Ligand)             | 1.30 |
|                                              | (GLU204) OE2-C (Ligand)       | 3.68 |                                                    | (THR92) HG1-O (Ligand)             | 2.37 |
|                                              | (GLU204) OE2-Pi interaction   | 3.56 | <b>3SY7-<br/>Artomunoxanthent<br/>rioneepoxide</b> |                                    |      |
|                                              | (ALA175) Pi-Alkyl interaction | 5.18 |                                                    | (LYS114) NZ-Pi interaction         | 4.06 |
|                                              | (ALA175) Alkyl-C (Ligand)     | 4.16 |                                                    | (TYR68) HH-O (Ligand)              | 2.43 |
|                                              | (PHE216) Pi-AlkyL-C (Ligand)  | 4.97 |                                                    | (THR49) HG1-O (Ligand)             | 2.08 |
|                                              |                               |      |                                                    | (SER200) HG-Pi interaction         | 2.62 |

|                                            |                                   |      |                                                             |                               |      |
|--------------------------------------------|-----------------------------------|------|-------------------------------------------------------------|-------------------------------|------|
|                                            | (PHE199) Pi-Alkyl-C (Ligand)      | 4.95 | <b>3SY7-N-(6-Oxo-6H-dibenzo[b,d]pyran-3-yl)maleamicacid</b> | (PRO123) Pi-Alkyl interaction | 4.99 |
|                                            | (ILE446) Pi-Alkyl interaction     | 5.19 |                                                             | (ARG190) Pi-Alkyl interaction | 5.32 |
| <b>1X0U-3,4',5,6,8-Pentamethoxyflavone</b> | (TYR372) HN-O (Ligand)            | 2.41 |                                                             | (TYR214) HH-O (Ligand)        | 2.39 |
|                                            | (PRO370) Alkyl-C (Ligand)         | 5.03 |                                                             | (SER198) CB-O (Ligand)        | 3.53 |
|                                            | (ILE205) CG2-Pi-Sigma interaction | 3.63 |                                                             | (SER198) HN-O (Ligand)        | 2.70 |
|                                            | (ILE205) Pi-Alkyl interaction     | 4.42 |                                                             | (ASN218) OD1-H (Ligand)       | 2.20 |
|                                            | (ILE205) Alkyl-C (Ligand)         | 4.03 | <b>3SY7-Petasitenine</b>                                    | (PHE133) HN-O (Ligand)        | 2.23 |
|                                            | (ALA175) Alkyl-C (Ligand)         | 4.13 |                                                             | (LEU132) HN-H (Ligand)        | 2.50 |
|                                            | (THR201) OG1-O (Ligand)           | 2.90 |                                                             | (ASP96) O-C (Ligand)          | 3.76 |
| <b>1X0U-Afzelechin</b>                     | (GLU396) OE2-H (Ligand)           | 1.94 | <b>3SY7-Pheophorbidea</b>                                   | (ASN218) O-H (Ligand)         | 2.18 |
|                                            | (LYS515) O-H (Ligand)             | 2.66 |                                                             | (ASN218) HD21- Pi interaction | 3.18 |
|                                            | (LYS515) Pi-Alkyl interaction     | 4.12 |                                                             | (ALA259) Alkyl-C (Ligand)     | 3.74 |
|                                            | (LYS515) O-C (Ligand)             | 3.62 |                                                             | (PHE298) Pi-Alkyl-C (Ligand)  | 4.86 |
|                                            | (LYS515) Pi-Alkyl interaction     | 4.34 |                                                             | (ASP232) OD2- Pi interaction  | 4.17 |
|                                            | (ARG512) Pi-Alkyl interaction     | 5.23 |                                                             | (ASP232) OD1- Pi interaction  | 3.17 |
| <b>1X0U-4-(3-Hydroxy-7-phenyl-6-</b>       | (GLU396) OE2-H (Ligand)           | 2.33 |                                                             | (ASP232) OD2- Pi interaction  | 4.88 |

|                                                             |                               |      |                                |                                           |      |
|-------------------------------------------------------------|-------------------------------|------|--------------------------------|-------------------------------------------|------|
| <b>heptenyl)-1,2-benzenediol</b>                            | (LYS515) O-H (Ligand)         | 2.65 | <b>3SY7-PyrafolineD</b>        | (SER200) HG-O (Ligand)                    | 2.32 |
|                                                             | (LYS515) NZ-Pi interaction    | 4.87 |                                | (PHE409) Pi-Pi interaction (Ligand)       | 5.60 |
|                                                             | (LYS515) HZ3-Pi interaction   | 2.81 |                                | (PHE409) Pi-Pi interaction (Ligand)       | 4.19 |
|                                                             | (ARG512) Pi-Alkyl interaction | 4.87 |                                | (PHE409) Pi-Pi interaction (Ligand)       | 3.82 |
| <b>1X0U-Artomunoxanthentri one epoxide</b>                  | (GLY411) CA-O (Ligand)        | 3.67 |                                | (PHE409) Pi-Alkyl interaction             | 5.32 |
| <b>1X0U-Lactucin</b>                                        | (GLY177) HN-O (Ligand)        | 2.57 |                                | (TYR27) Pi-Alkyl interaction              | 4.24 |
|                                                             | (GLY412) HN-O (Ligand)        | 2.36 |                                | (TYR27) Pi-Alkyl-C (Ligand)               | 4.92 |
|                                                             | (GLY137) CA-O (Ligand)        | 3.46 |                                | (LEU411) Alkyl-Alkyl interaction (Ligand) | 5.27 |
| <b>1X0U-LinifolinA</b>                                      | (ALA138) HN-O (Ligand)        | 2.22 |                                | (LEU411) Alkyl -C (Ligand)                | 4.94 |
|                                                             | (GLY177) HN-O (Ligand)        | 2.04 |                                | (TRP42) Pi-Sigma-C (Ligand)               | 3.79 |
|                                                             | (THR438) HG1-O (Ligand)       | 2.50 |                                | (TRP42) Pi-Alkyl-C (Ligand)               | 4.09 |
| <b>1X0U-N-(6-Oxo-6H-dibenzo[b,d]pyran-3-yl)maleamicacid</b> | (TYR392) HH-O (Ligand)        | 2.22 | <b>3SY7-Pyropheophorbide a</b> | (TRP42) Pi-Alkyl-C (Ligand)               | 4.45 |
|                                                             | (GLY518) HN-O (Ligand)        | 2.34 |                                | (GLN119) OE1-HN (Ligand)                  | 2.82 |
|                                                             | (HIS517) CA-O (Ligand)        | 3.35 |                                | (GLN119) OE1-HN (Ligand)                  | 2.54 |
|                                                             | (TYR513) O-H (Ligand)         | 2.78 |                                | (GLN119) OE1- Pi interaction (Ligand)     | 2.45 |

|                                              |                                      |      |                   |                                                        |      |
|----------------------------------------------|--------------------------------------|------|-------------------|--------------------------------------------------------|------|
|                                              | (LYS515) O-H<br>(Ligand)             | 2.29 |                   | (GLN119)<br>OE1-<br>HN(Ligand)                         | 2.64 |
|                                              | (LYS515) Pi-<br>Alkyl<br>interaction | 4.16 |                   | (GLN119)<br>OE1-<br>H(Ligand)                          | 2.68 |
|                                              | (LYS515) NZ-<br>Pi interaction       | 4.43 |                   | (LYS114)<br>HZ1-O<br>(Ligand)                          | 2.16 |
|                                              | (LYS515) NZ-<br>Pi interaction       | 3.62 |                   | (LEU22)<br>Alkyl-Alkyl<br>interaction<br>(Ligand)      | 5.22 |
|                                              | (ARG512) Pi-<br>Alkyl<br>interaction | 4.86 |                   | (LEU47)<br>Alkyl-Alkyl<br>interaction<br>(Ligand)      | 4.88 |
| <b>1X0U-N6-cis-p-<br/>Coumaroylserotonin</b> | (TYR392) HH-<br>O (Ligand)           | 2.66 |                   | (PRO134) Pi-<br>Alkyl<br>interaction                   | 4.12 |
|                                              | (LYS515) NZ-<br>Pi interaction       | 4.10 |                   | (PRO134)<br>Alkyl-Alkyl<br>interaction<br>(Ligand)     | 4.51 |
|                                              | (LYS515) Pi-<br>Alkyl<br>interaction | 4.62 | <b>3SY7-Rutin</b> | (TYR97) Pi-Pi<br>interaction<br>(Ligand)               | 5.04 |
|                                              | (ARG512) Pi-<br>Alkyl<br>interaction | 4.31 |                   | (TYR97) Pi-Pi<br>T-shaped<br>interaction<br>(Ligand)   | 5.00 |
|                                              | (LYS516) O-H<br>(Ligand)             | 2.36 |                   | (PHE133) Pi-<br>Pi T-shaped<br>interaction<br>(Ligand) | 4.83 |
|                                              | (LYS515) NZ-<br>Pi interaction       | 3.94 |                   | (PHE133) CB-<br>Pi- Sigma<br>interaction<br>(Ligand)   | 3.87 |
|                                              | (ARG512) Pi-<br>Alkyl<br>interaction | 4.95 |                   | (PHE133) HN-<br>O (Ligand)                             | 2.48 |
| <b>1X0U-Petasitenine</b>                     | (GLY439) HN-<br>O (Ligand)           | 2.97 |                   | (LEU132) Pi-<br>Alkyl<br>interaction<br>(Ligand)       | 5.23 |



|                           |                                         |      |                           |                                              |      |
|---------------------------|-----------------------------------------|------|---------------------------|----------------------------------------------|------|
|                           | (GLY411) CA-O (Ligand)                  | 3.44 |                           | (LEU132) HN-O (Ligand)                       | 2.82 |
|                           | (GLY202) HN-O (Ligand)                  | 2.07 |                           | (ARG131) HH22-O (Ligand)                     | 2.19 |
|                           | (THR201) CA-O (Ligand)                  | 3.35 |                           | (ARG131) HE-H (Ligand)                       | 1.92 |
|                           | (GLU204) OE1-C (Ligand)                 | 3.49 |                           | (ASP295) OD2-H (Ligand)                      | 2.39 |
| <b>1X0U-Pheophorbidea</b> | (PRO282) O-H (Ligand)                   | 1.94 |                           | (ARG410) HH11-O (Ligand)                     | 2.45 |
|                           | (ARG470) HE-O (Ligand)                  | 2.43 |                           | (GLY293) O-H (Ligand)                        | 2.49 |
|                           | (ARG470) HH22-O (Ligand)                | 2.21 |                           | (SER130) O-C (Ligand)                        | 3.49 |
|                           | (TYR477) Pi Alkyl-C (Ligand)            | 4.98 |                           | (ARG39) HH21-H (Ligand)                      | 2.53 |
|                           | (LEU11) Pi-Alkyl interaction            | 5.47 | <b>3SY7-Sciadopitysin</b> | (ALA300) O-C (Ligand)                        | 3.53 |
|                           | (LYS5) HT2- Pi interaction (Ligand)     | 3.12 |                           | (PHE298) Pi-Pi T-shaped interaction (Ligand) | 5.66 |
|                           | (LYS5) N- Pi interaction (Ligand)       | 3.88 |                           | (ASP232) OD1- Pi interaction (Ligand)        | 4.30 |
|                           | (LYS5) CO-(PRO6) N-Amide-Pi interaction | 4.74 |                           | (ASN218) HD22-O (Ligand)                     | 3.03 |
|                           | (PRO6) Pi-Alkyl interaction             | 4.84 |                           | (TYR214) HH-Pi interaction (Ligand)          | 3.12 |
|                           | (LYS471) Pi-Alkyl interaction           | 4.44 |                           | (PRO123) Alkyl-C (Ligand)                    | 4.23 |
|                           | (LYS471) Alkyl-C (Ligand)               | 3.65 |                           | (TYR202) Pi-Alkyl-C (Ligand)                 | 4.93 |

|                                |                               |      |                                |                                        |      |
|--------------------------------|-------------------------------|------|--------------------------------|----------------------------------------|------|
|                                | (ASP284) OD1-C (Ligand)       | 3.53 |                                | (ALA259) Alkyl-C (Ligand)              | 3.81 |
|                                | (ASN283) CA-O (Ligand)        | 3.52 |                                | (ALA259) Pi-Alkyl interaction (Ligand) | 5.21 |
| <b>1X0U-PyrafolineD</b>        | (VAL158) Alkyl-C (Ligand)     | 5.23 |                                | (ALA257) Alkyl-C (Ligand)              | 4.25 |
|                                | (MET159) Alkyl-C (Ligand)     | 5.43 |                                | (ALA257) Pi-Alkyl interaction (Ligand) | 4.69 |
|                                | (TYR392) HH-O (Ligand)        | 2.62 |                                | (ARG319) NH1- Pi interaction (Ligand)  | 4.08 |
|                                | (ARG512) Pi-Alkyl interaction | 4.94 |                                | (ARG319) HH21-O (Ligand)               | 2.05 |
|                                | (ARG512) Pi-Alkyl interaction | 5.19 | <b>3SY7-Thalidasine</b>        | (GLY293) O-C (Ligand)                  | 3.74 |
|                                | (ARG512) Pi-Alkyl interaction | 5.22 |                                | (PHE28) Pi-Alkyl-C (Ligand)            | 4.15 |
|                                | (LYS515) NZ-Pi interaction    | 3.70 |                                | (TYR26) Pi-Sigma-C (Ligand)            | 3.90 |
|                                | (LYS515) Pi-Alkyl interaction | 4.17 |                                | (LEU132) Alkyl-C (Ligand)              | 3.82 |
|                                | (LYS515) Pi-Alkyl interaction | 4.70 |                                | (ASP41) OD2-C (Ligand)                 | 3.27 |
|                                | LYS516) Alkyl-C (Ligand)      | 4.03 |                                | (ASP41) OD2-Pi interaction (Ligand)    | 4.44 |
|                                | ARG512) Alkyl-C (Ligand)      | 3.69 |                                | (TYR97) Pi-Pi interaction (Ligand)     | 4.06 |
| <b>1X0U-Pyropheophorbide a</b> | VAL209) Pi-Alkyl interaction  | 4.72 | <b>1X0U-Pyropheophorbide a</b> | PRO334) O-H (Ligand)                   | 2.37 |

|  |                                 |      |  |                                                      |      |
|--|---------------------------------|------|--|------------------------------------------------------|------|
|  | VAL209) Pi-Alkyl interaction    | 5.14 |  | ARG407) HH12-O (Ligand)                              | 2.37 |
|  | ILE205) Alkyl-Alkyl interaction | 4.97 |  | LYS408) HZ1-O (Ligand)                               | 2.07 |
|  | PRO370) Pi-Alkyl interaction    | 4.89 |  | PHE337) C,O;(GLY338) N-Amide Pi interaction (Ligand) | 4.21 |
|  | PRO370) Pi-Alkyl interaction    | 4.51 |  | PHE337) Pi-Alkyl- C (Ligand)                         | 5.33 |
|  | PRO370) Pi-Alkyl interaction    | 4.95 |  | VAL373) Alkyl-C (Ligand)                             | 3.68 |
