# Supplementary material for: Anti-Adhesion and Antibiofilm Activity of Eruca sativa Miller Extract Targeting Cell Adhesion Proteins of Food-Borne Bacteria as a Potential Mechanism: Combined In Vitro-In Silico Approach
Source: MDPI journal article supplement (doi:10.3390/plants11050610), 2022-02-24
Supplement: s1 [file s1]

## Positive Analysis

Qualitative Compound Report

1. (+/-)-3-[(2-methyl-3-furyl)thio]-2-butanone

| Compound Label                                     | Name                                        | m/z      | RT    | Algorithm  | Mass     |
|----------------------------------------------------|---------------------------------------------|----------|-------|------------|----------|
| Cpd 1: (+/-)-3-[(2-methyl-3-furyl)thio]-2-butanone | (+/-)-3-[(2-methyl-3-furyl)thio]-2-butanone | 185.0649 | 0.816 | Auto MS/MS | 184.0576 |

MS Spectrum

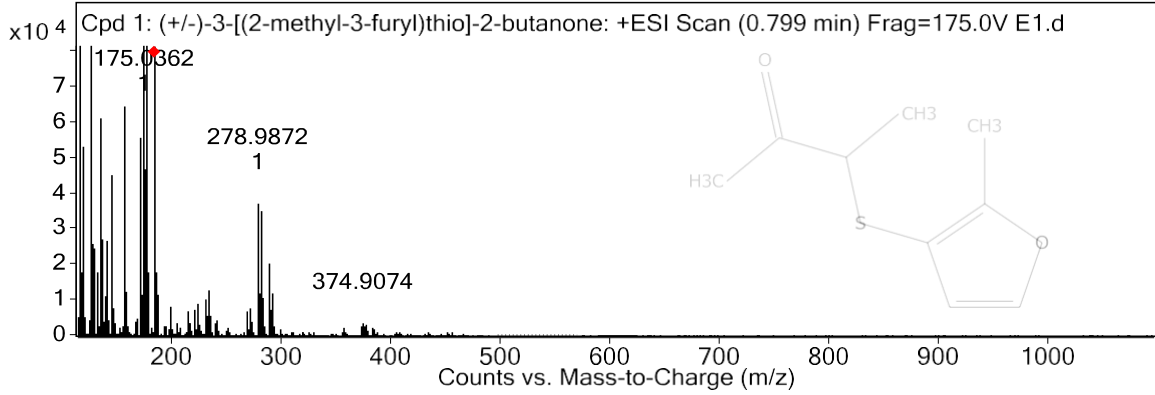

MS Zoomed Spectrum

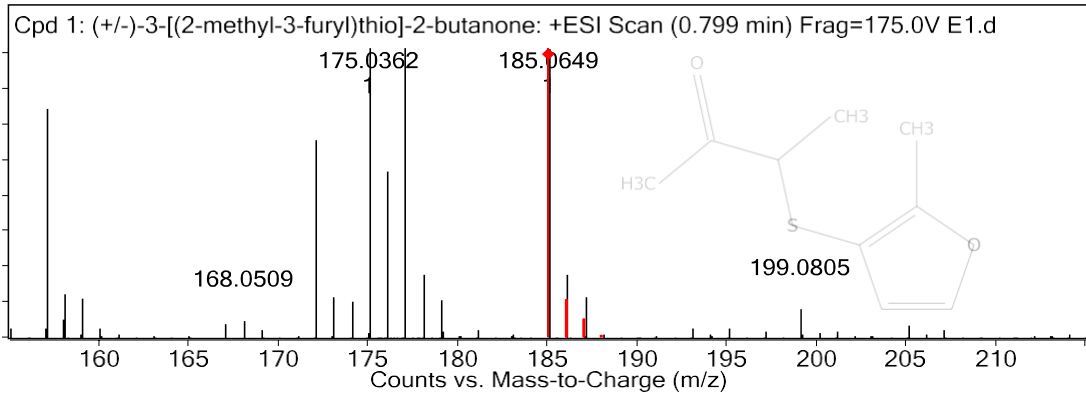

MS Spectrum Peak List

| m/z      | Calc m/z | Diff(ppm) | z | Abund     | Formula     | Ion    |
|----------|----------|-----------|---|-----------|-------------|--------|
| 116.9947 |          |           | 1 | 110012.21 |             |        |
| 127.0232 |          |           | 1 | 158665.36 |             |        |
| 135.005  |          |           | 1 | 61114.48  |             |        |
| 157.0701 |          |           | 1 | 64821.2   |             |        |
| 175.0362 |          |           | 1 | 209358.02 |             |        |
| 177.0334 |          |           | 1 | 111970.17 |             |        |
| 185.0649 | 185.0631 | -9.94     | 1 | 81394.4   | C9 H12 O2 S | (M+H)+ |
| 186.0666 | 186.0662 | -2.07     | 1 | 17901.9   | C9 H12 O2 S | (M+H)+ |
| 187.0636 | 187.0605 | -16.45    | 1 | 11618.34  | C9 H12 O2 S | (M+H)+ |
| 188.0677 | 188.0633 | -23.31    | 1 | 861.09    | C9 H12 O2 S | (M+H)+ |

MSMS Spectrum

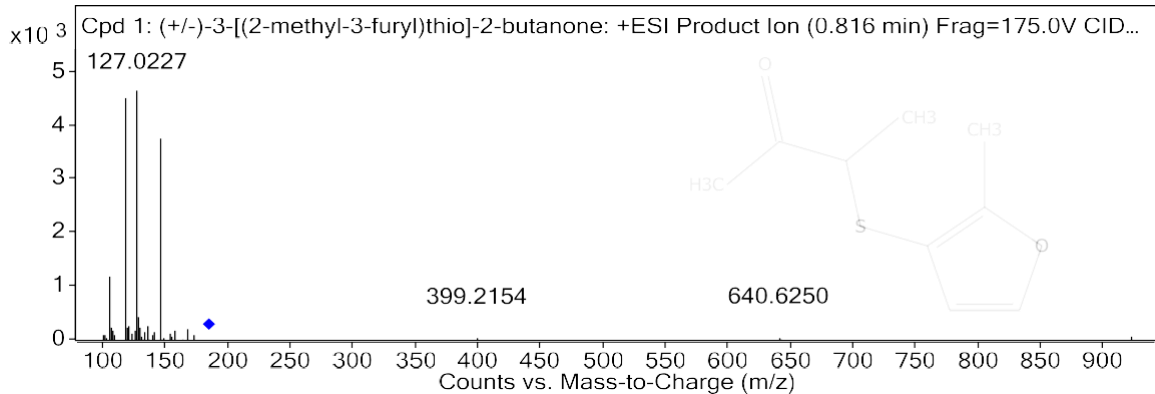

MS/MS Spectrum Peak List

| m/z      | z | Abund   |
|----------|---|---------|
| 105.0023 | 1 | 1196.47 |
| 117.039  | 1 | 4526.39 |
| 118.041  | 1 | 620.45  |
| 119.5702 |   | 267.18  |
| 127.0227 | 1 | 4663.13 |
| 128.0243 | 1 | 437.18  |
| 129.0214 | 1 | 256.6   |
| 135.0051 |   | 290.05  |
| 145.0336 | 1 | 3758.91 |
| 146.0345 | 1 | 312.31  |

Compound Structure

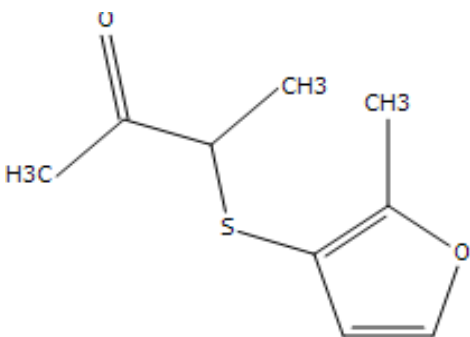

Qualitative Compound Report

2. Methyl N-methylantranilate

| Compound Label                    | Name                       | m/z      | RT   | Algorithm  | Mass    |
|-----------------------------------|----------------------------|----------|------|------------|---------|
| Cpd 8: Methyl N-methylantranilate | Methyl N-methylantranilate | 166.0852 | 2.06 | Auto MS/MS | 165.078 |

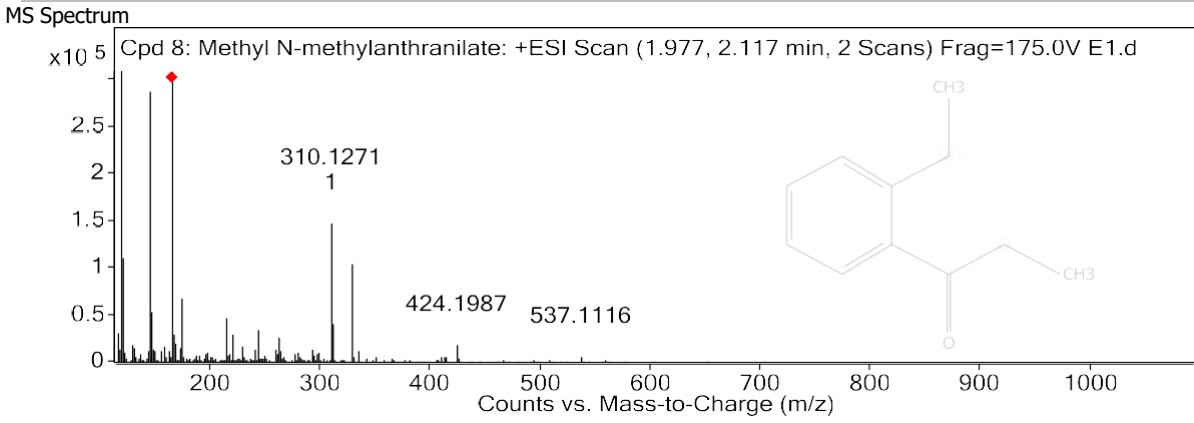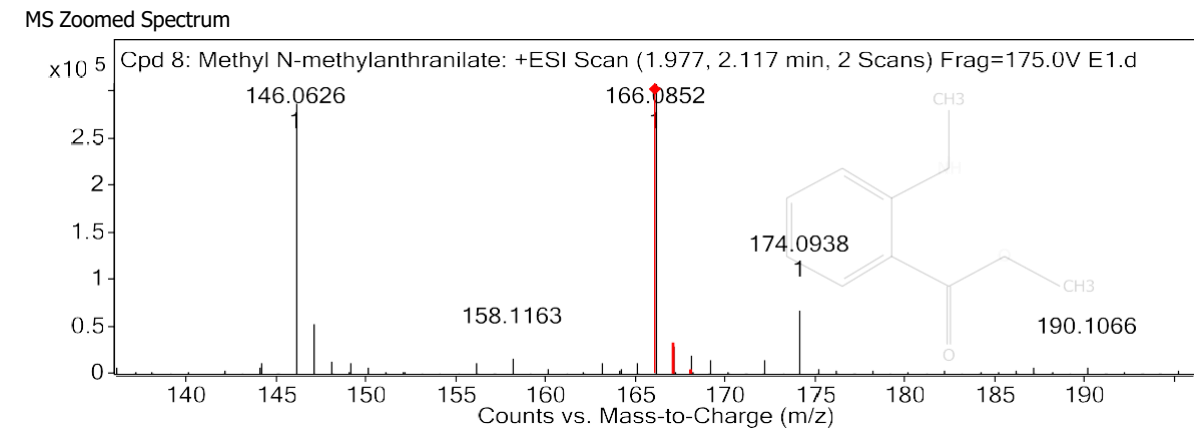

MS Spectrum Peak List

| MSMS Spectrum |          |           |   |           |             |        | MS/MS Spectrum Peak List |   |         |
|---------------|----------|-----------|---|-----------|-------------|--------|--------------------------|---|---------|
| m/z           | Calc m/z | Diff(ppm) | z | Abund     | Formula     | Ion    | m/z                      | z | Abund   |
| 119.0518      |          |           |   | 56329.89  |             |        | 103.0536                 | 1 | 362.83  |
| 120.0802      |          |           | 1 | 1174467.5 |             |        | 104.1058                 |   | 90.32   |
| 121.0835      |          |           | 1 | 111715.97 |             |        | 120.0799                 | 1 | 3076.68 |
| 146.0626      |          |           | 1 | 288672.16 |             |        | 121.083                  | 1 | 329.44  |
| 166.0852      | 166.0863 | 6.32      | 1 | 308575.47 | C9 H11 N O2 | (M+H)+ | 146.063                  |   | 266.01  |
| 167.0886      | 167.0894 | 4.93      | 1 | 30060.38  | C9 H11 N O2 | (M+H)+ | 147.0478                 |   | 146.39  |
| 168.0931      | 168.0916 | -8.76     | 1 | 3461.47   | C9 H11 N O2 | (M+H)+ | 156.0992                 | 1 | 83.49   |
| 174.0938      |          |           | 1 | 67972.09  |             |        | 163.0855                 |   | 82.34   |
| 310.1271      |          |           | 1 | 147865.09 |             |        | 166.0835                 |   | 319.03  |
| 328.1377      |          |           | 1 | 105372.38 |             |        | 708.2548                 |   | 88.55   |

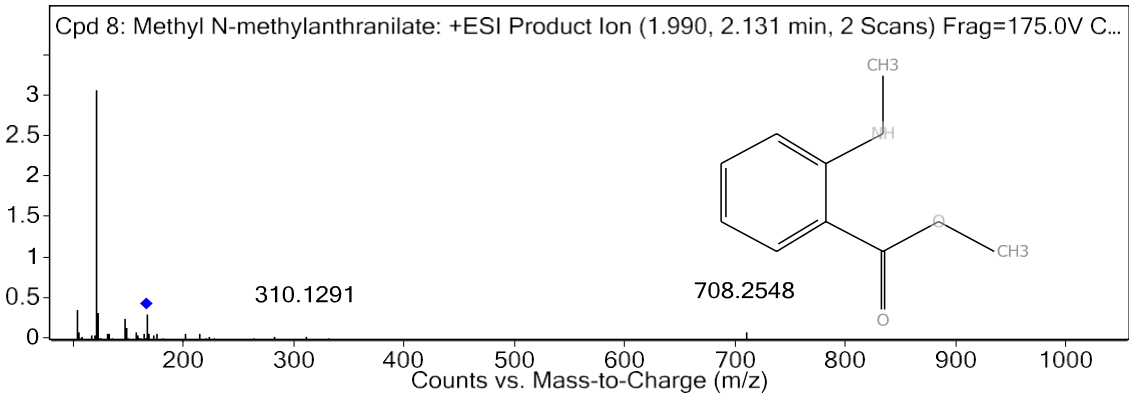

Compound Structure

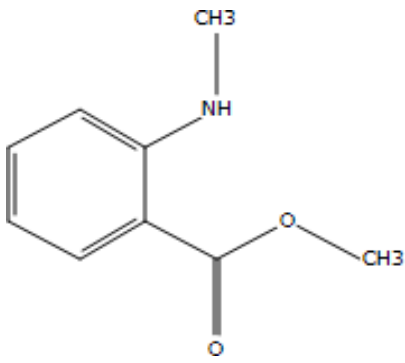

Qualitative Compound Report

3. Indoleacrylic acid

|                            |                    |          |       |            |          |
|----------------------------|--------------------|----------|-------|------------|----------|
| Cpd 12: Indoleacrylic acid | Indoleacrylic acid | 188.0696 | 3.189 | Auto MS/MS | 187.0623 |
| Compound Label             | Name               | m/z      | RT    | Algorithm  | Mass     |

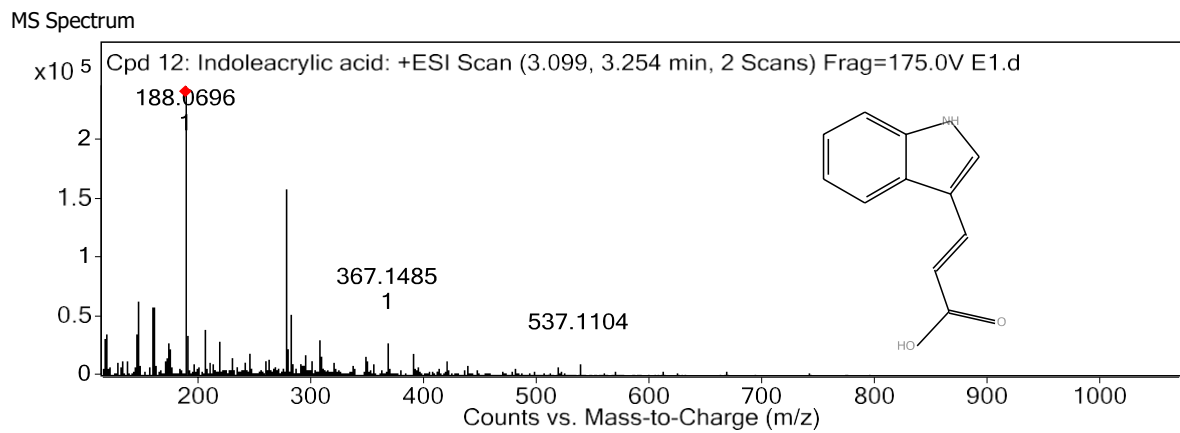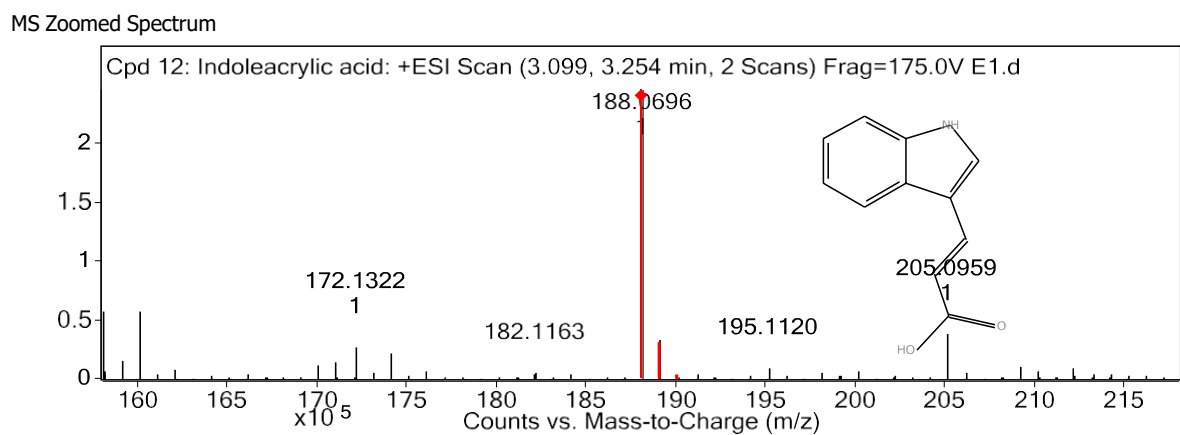

MS Spectrum Peak List

| m/z      | Calc m/z | Diff(ppm) | z | Abund     | Formula     | Ion    |
|----------|----------|-----------|---|-----------|-------------|--------|
| 146.0599 |          |           | 1 | 63107.44  |             |        |
| 158.0802 |          |           | 1 | 58685.86  |             |        |
| 160.0779 |          |           | 1 | 58120.28  |             |        |
| 188.0696 | 188.0706 | 5.31      | 1 | 245927.19 | C11 H9 N O2 | (M+H)+ |
| 189.0724 | 189.0738 | 7.46      | 1 | 33734.57  | C11 H9 N O2 | (M+H)+ |
| 190.0769 | 190.0762 | -3.65     | 1 | 2726.04   | C11 H9 N O2 | (M+H)+ |
| 205.0959 |          |           | 1 | 38747.41  |             |        |
| 277.1203 |          |           | 1 | 158999.75 |             |        |
| 277.1557 |          |           | 1 | 76581.17  |             |        |
| 281.159  |          |           | 1 | 52007.66  |             |        |

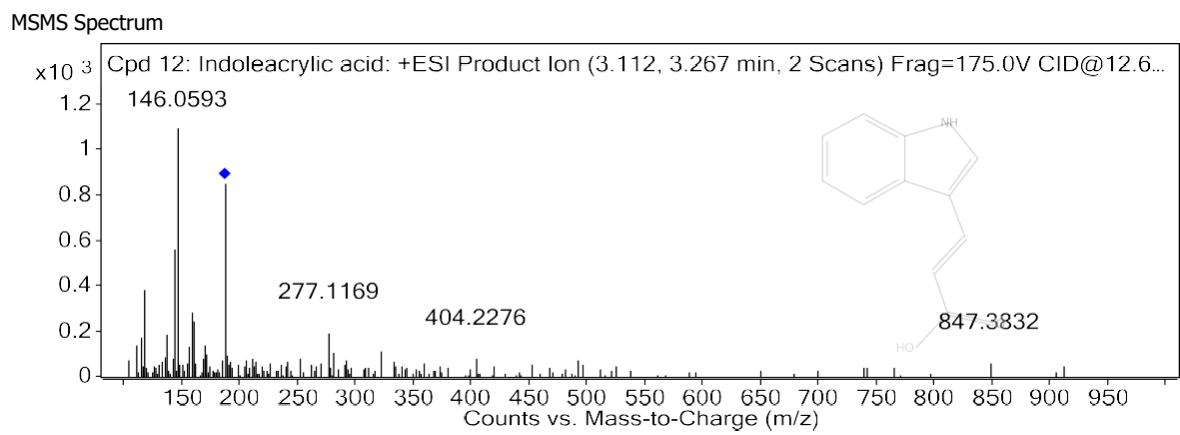

MS/MS Spectrum Peak List

| m/z      | z | Abund   |
|----------|---|---------|
| 115.0519 |   | 180.68  |
| 118.0642 |   | 388.08  |
| 137.105  |   | 193.65  |
| 143.0726 |   | 235.59  |
| 144.0793 |   | 565.64  |
| 146.0593 | 1 | 1102.29 |
| 158.0803 |   | 292.75  |
| 160.0726 | 1 | 247.65  |
| 188.0688 | 1 | 858.54  |
| 277.1169 |   | 198.72  |

Compound Structure

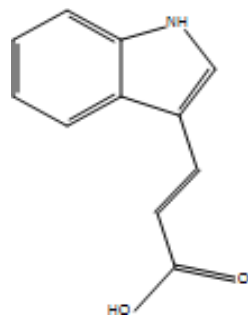



Qualitative Compound Report

4. Pyrafoline D

| Compound Label       | Name         | m/z      | RT    | Algorithm  | Mass     |
|----------------------|--------------|----------|-------|------------|----------|
| Cpd 15: Pyrafoline D | Pyrafoline D | 348.2001 | 3.705 | Auto MS/MS | 347.1928 |

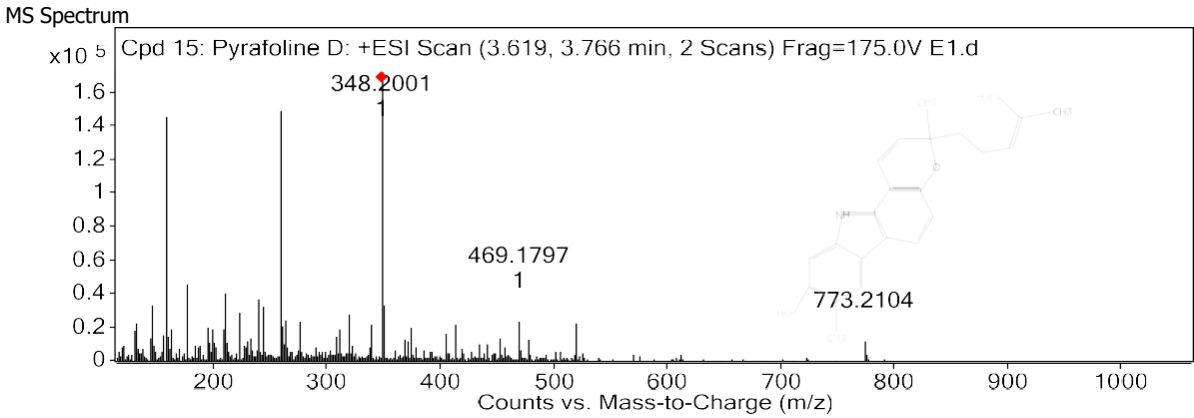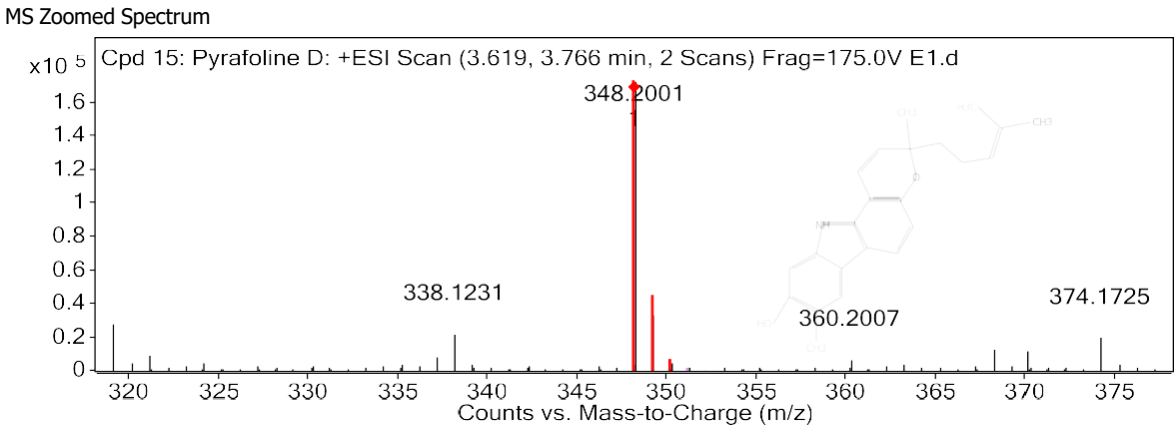

MS Spectrum Peak List

| m/z      | Calc m/z | Diff(ppm) | z | Abund     | Formula      | Ion    |
|----------|----------|-----------|---|-----------|--------------|--------|
| 146.0604 |          |           |   | 33641.77  |              |        |
| 158.0805 |          |           | 1 | 146882.72 |              |        |
| 176.0695 |          |           |   | 46682.13  |              |        |
| 210.1112 |          |           |   | 41401.32  |              |        |
| 240.071  |          |           |   | 37430.91  |              |        |
| 244.153  |          |           |   | 33074.08  |              |        |
| 259.1096 |          |           | 1 | 149736.44 |              |        |
| 348.2001 | 348.1958 | -12.45    | 1 | 173245.17 | C23 H25 N O2 | (M+H)+ |
| 349.2035 | 349.1991 | -12.5     | 1 | 34117.08  | C23 H25 N O2 | (M+H)+ |
| 350.2029 | 350.2021 | -2.1      | 1 | 5685.56   | C23 H25 N O2 | (M+H)+ |

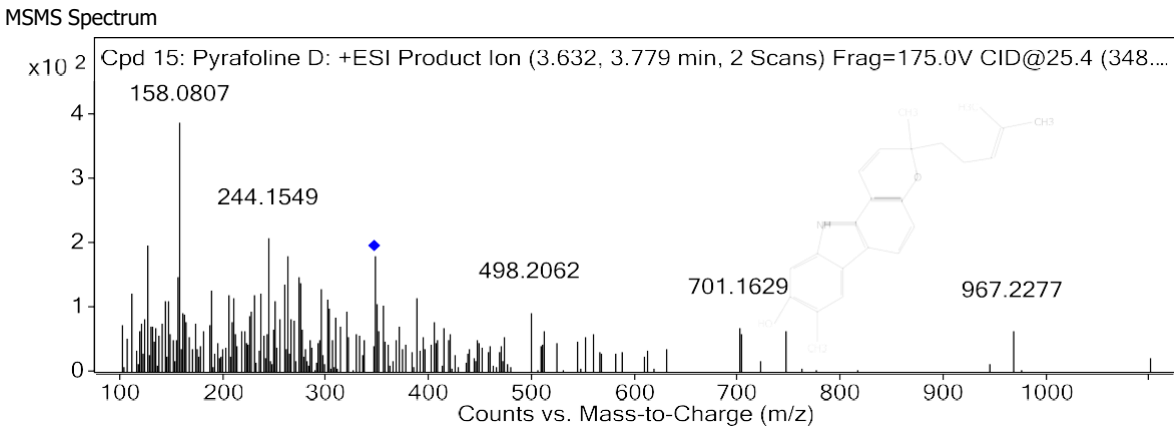

MS/MS Spectrum Peak List

| m/z      | Abund  |
|----------|--------|
| 127.0379 | 196.93 |
| 156.1001 | 149.07 |
| 158.0807 | 388.59 |
| 244.1549 | 208.11 |
| 259.1114 | 137.2  |
| 263.1368 | 180.15 |
| 273.1203 | 148.49 |
| 275.1368 | 139.65 |
| 295.1375 | 129.33 |
| 348.1976 | 180.69 |

Compound Structure

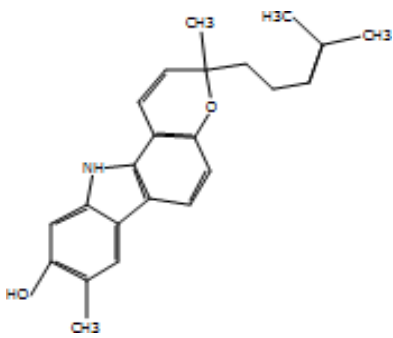

Qualitative Compound Report

5. Petasitenine

| Compound Label       | Name         | m/z      | RT    | Algorithm  | Mass     |
|----------------------|--------------|----------|-------|------------|----------|
| Cpd 20: Petasitenine | Petasitenine | 382.1846 | 4.232 | Auto MS/MS | 381.1773 |

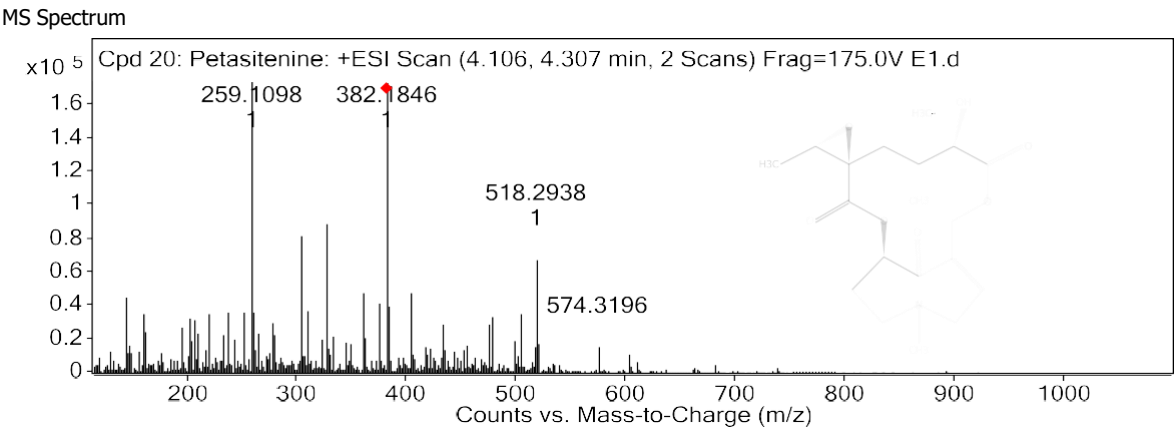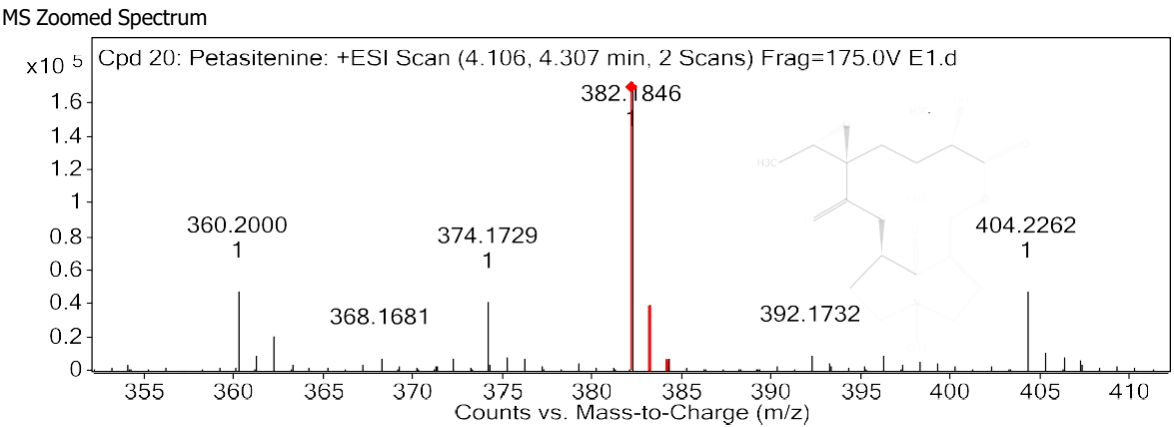

MS Spectrum Peak List

| m/z      | Calc m/z | Diff(ppm) | z | Abund     | Formula      | Ion    |
|----------|----------|-----------|---|-----------|--------------|--------|
| 144.0797 |          |           |   | 45903.2   |              |        |
| 259.1098 |          |           | 1 | 242151.56 |              |        |
| 303.1326 |          |           | 1 | 82336.95  |              |        |
| 327.1029 |          |           | 1 | 89596.5   |              |        |
| 360.2    |          |           | 1 | 48061.79  |              |        |
| 382.1846 | 382.186  | 3.77      | 1 | 173587.88 | C19 H27 N O7 | (M+H)+ |
| 383.1878 | 383.1893 | 3.93      | 1 | 40120.95  | C19 H27 N O7 | (M+H)+ |
| 384.19   | 384.1917 | 4.53      | 1 | 8303.24   | C19 H27 N O7 | (M+H)+ |
| 404.2262 |          |           | 1 | 47920.5   |              |        |
| 518.2938 |          |           | 1 | 68385.55  |              |        |

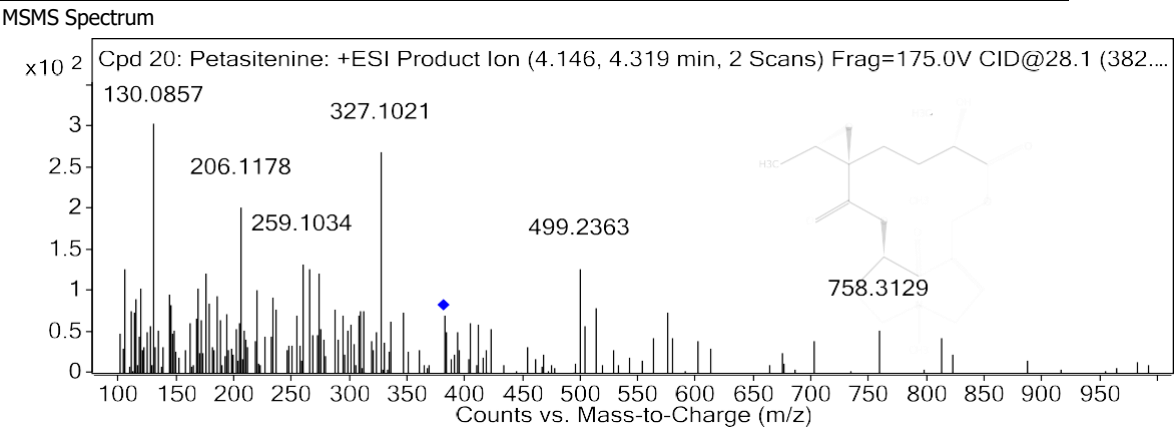

MS/MS Spectrum Peak List

| m/z      | Abund  |
|----------|--------|
| 105.0698 | 128.07 |
| 130.0857 | 304.6  |
| 168.1006 | 103.73 |
| 175.0748 | 121.44 |
| 206.1178 | 201.29 |
| 259.1034 | 132.65 |
| 264.1551 | 128.11 |
| 273.1219 | 121.65 |
| 327.1021 | 268.63 |
| 499.2363 | 127.54 |

Compound Structure

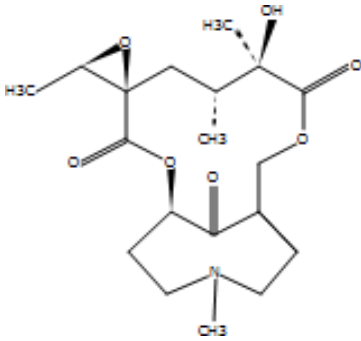

Qualitative Compound Report

6. Nopaline

| Compound Label   | Name     | m/z     | RT   | Algorithm  | Mass     |
|------------------|----------|---------|------|------------|----------|
| Cpd 23: Nopaline | Nopaline | 305.152 | 5.05 | Auto MS/MS | 304.1444 |

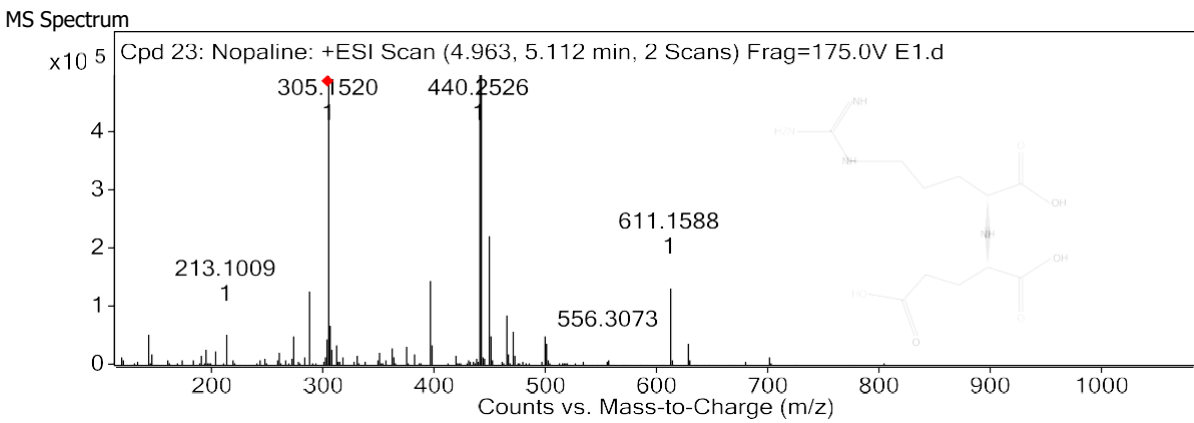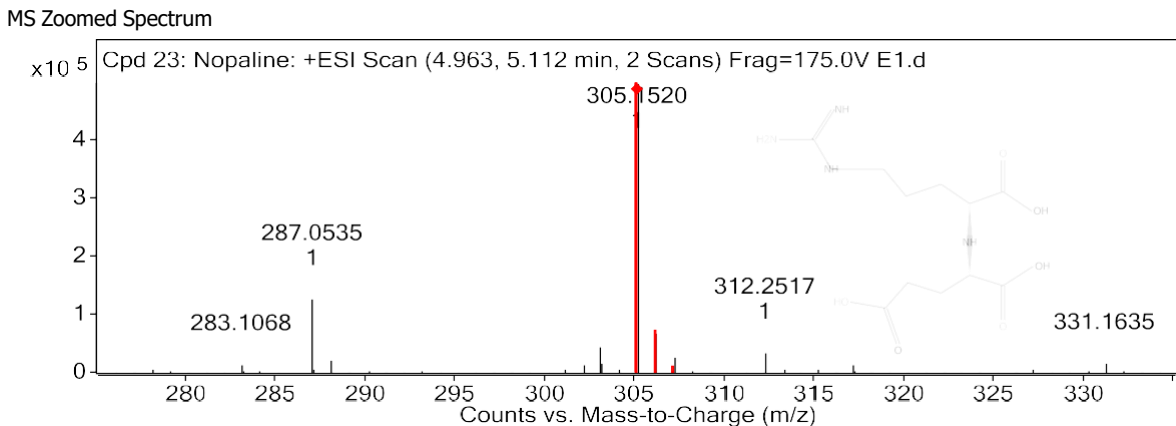

MS Spectrum Peak List

| m/z      | Calc m/z | Diff(ppm) | z | Abund     | Formula       | Ion    |
|----------|----------|-----------|---|-----------|---------------|--------|
| 287.0535 |          |           | 1 | 128043.7  |               |        |
| 305.152  | 305.1456 | -20.99    | 1 | 497112.03 | C11 H20 N4 O6 | (M+H)+ |
| 306.1546 | 306.1483 | -20.44    | 1 | 69755.84  | C11 H20 N4 O6 | (M+H)+ |
| 307.1505 | 307.1503 | -0.68     | 1 | 27771.19  | C11 H20 N4 O6 | (M+H)+ |
| 396.1999 |          |           | 1 | 145300.48 |               |        |
| 440.2526 |          |           | 1 | 2542112   |               |        |
| 441.2558 |          |           | 1 | 684534.38 |               |        |
| 442.2592 |          |           | 1 | 108497.92 |               |        |
| 449.1061 |          |           | 1 | 224013.75 |               |        |
| 611.1588 |          |           | 1 | 134280.39 |               |        |

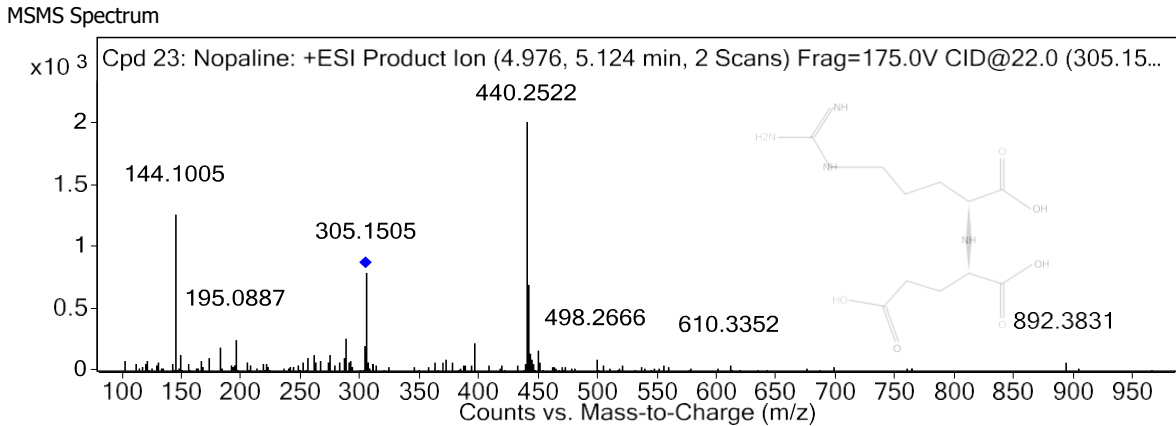

MS/MS Spectrum Peak List

| m/z      | z | Abund   |
|----------|---|---------|
| 144.1005 |   | 1259.69 |
| 182.1536 |   | 193.97  |
| 195.0887 |   | 254.36  |
| 287.0534 |   | 268.14  |
| 304.0525 |   | 202.63  |
| 305.1505 | 1 | 796.83  |
| 396.1993 |   | 232.85  |
| 440.2522 | 1 | 2015.27 |
| 441.2547 | 1 | 695.31  |
| 449.1042 | 1 | 167.43  |

Compound Structure

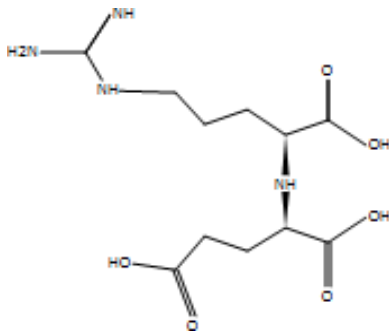

Qualitative Compound Report

7. Serinyl-Hydroxyproline

| Compound Label                 | Name                   | m/z      | RT    | Algorithm  | Mass     |
|--------------------------------|------------------------|----------|-------|------------|----------|
| Cpd 25: Serinyl-Hydroxyproline | Serinyl-Hydroxyproline | 219.0974 | 5.443 | Auto MS/MS | 218.0894 |

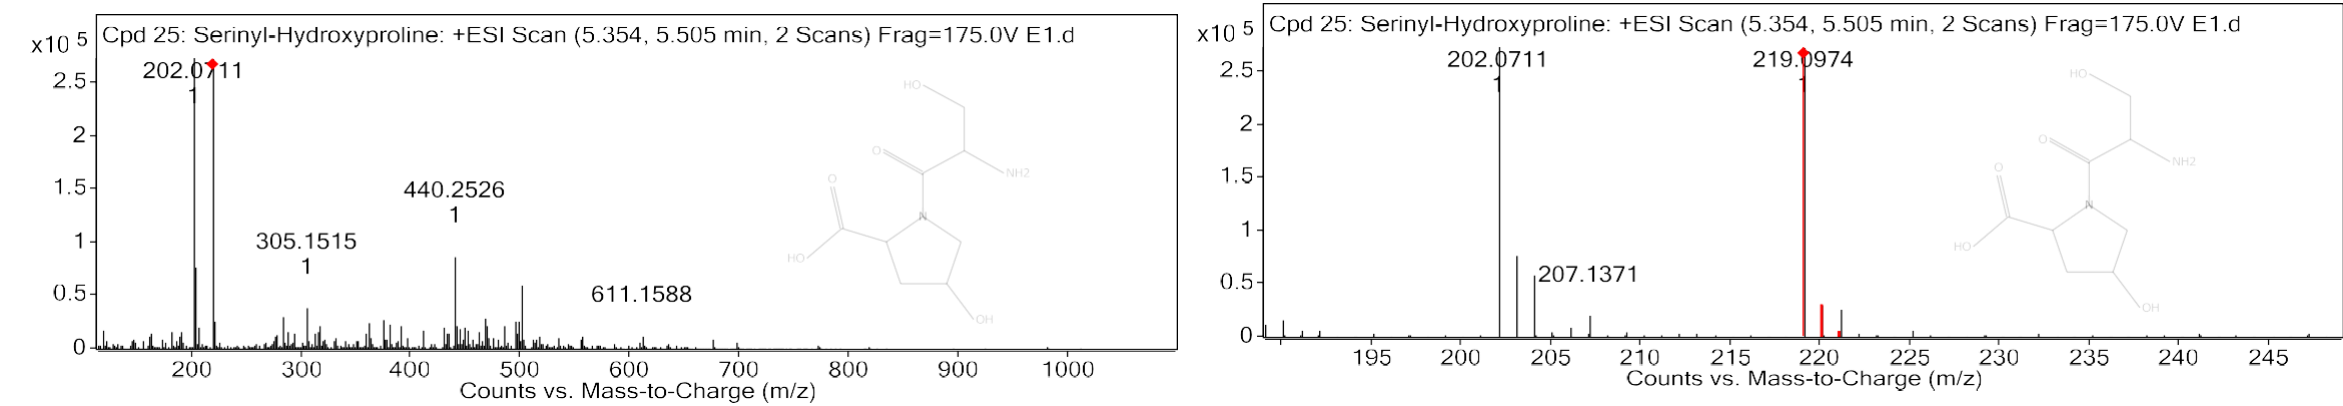

MS Spectrum

MS Zoomed Spectrum

MS Spectrum Peak List

| m/z      | Calc m/z | Diff(ppm) | z | Abund     | Formula      | Ion    |
|----------|----------|-----------|---|-----------|--------------|--------|
| 202.0711 |          |           | 1 | 671245.63 |              |        |
| 203.0739 |          |           | 1 | 77077.11  |              |        |
| 204.0669 |          |           | 1 | 58465.06  |              |        |
| 219.0974 | 219.0975 | 0.68      | 1 | 272534.03 | C8 H14 N2 O5 | (M+H)+ |
| 220.1003 | 220.1005 | 0.84      | 1 | 31596.74  | C8 H14 N2 O5 | (M+H)+ |
| 221.0936 | 221.1023 | 39.2      | 1 | 26596.18  | C8 H14 N2 O5 | (M+H)+ |
| 222.0971 | 222.1049 | 35.19     | 1 | 3723.83   | C8 H14 N2 O5 | (M+H)+ |
| 305.1515 |          |           | 1 | 38970.19  |              |        |
| 440.2526 |          |           | 1 | 87439.47  |              |        |
| 500.2837 |          |           | 1 | 60787.64  |              |        |

MSMS Spectrum

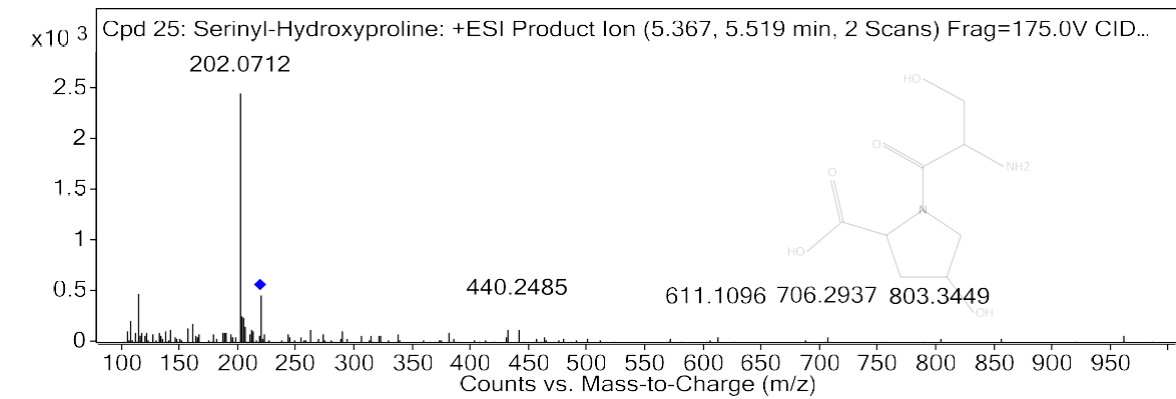

MS/MS Spectrum Peak List

| m/z      | z | Abund   |
|----------|---|---------|
| 107.084  |   | 214.26  |
| 114.0366 |   | 484.46  |
| 156.0822 |   | 144.5   |
| 160.0228 |   | 183.58  |
| 202.0712 | 1 | 2452.78 |
| 203.0746 | 1 | 263.33  |
| 204.0657 | 1 | 249.74  |
| 206.0781 |   | 156.23  |
| 219.0993 |   | 475.83  |
| 261.1173 |   | 138.41  |

Compound Structure

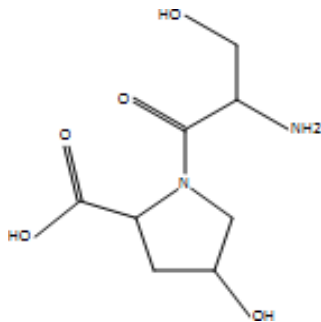

Qualitative Compound Report

8. Afzelechin

| Compound Label     | Name       | m/z      | RT    | Algorithm  | Mass    |
|--------------------|------------|----------|-------|------------|---------|
| Cpd 27: Afzelechin | Afzelechin | 275.0873 | 6.004 | Auto MS/MS | 274.079 |

MS Spectrum

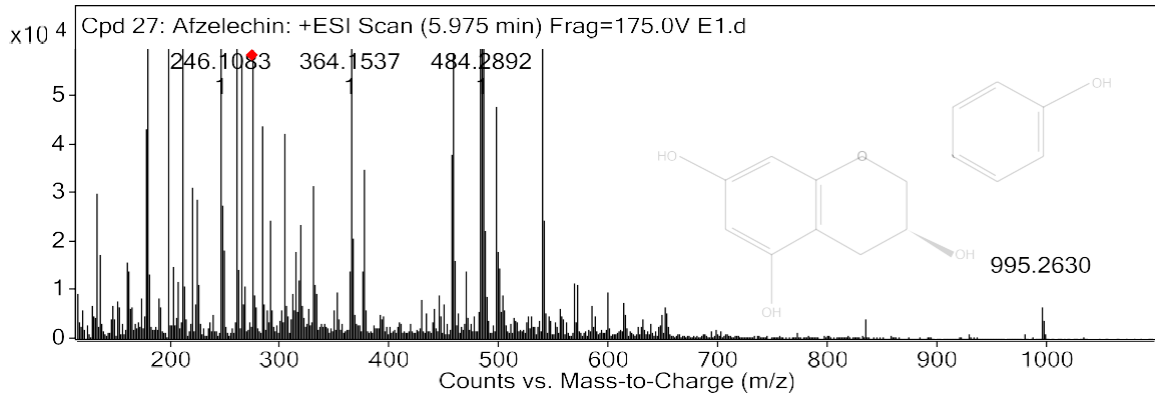

MS Zoomed Spectrum

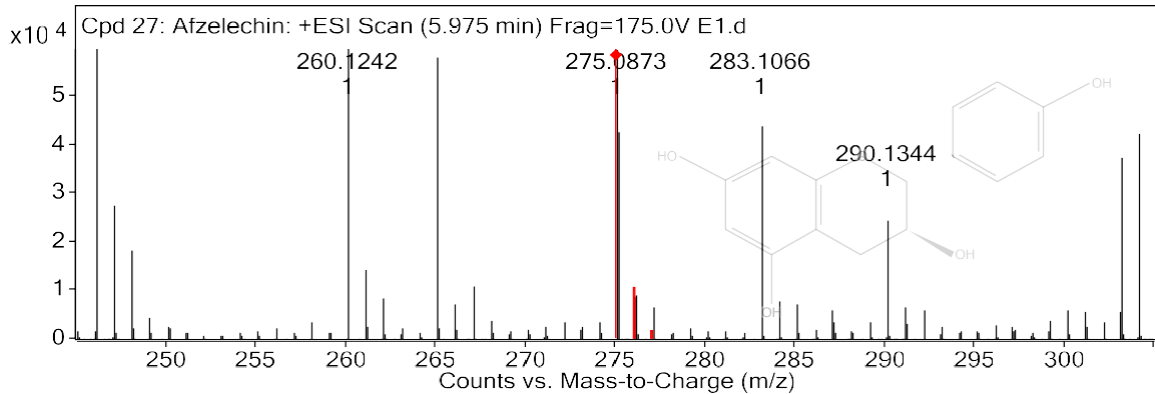

MS Spectrum Peak List

| m/z      | Calc m/z | Diff(ppm) | z | Abund     | Formula    | Ion    |
|----------|----------|-----------|---|-----------|------------|--------|
| 197.1164 |          |           | 1 | 218860.67 |            |        |
| 246.1083 |          |           | 1 | 231836.08 |            |        |
| 275.0873 | 275.0914 | 14.82     | 1 | 59687     | C15 H14 O5 | (M+H)+ |
| 276.0902 | 276.0948 | 16.56     | 1 | 8943.13   | C15 H14 O5 | (M+H)+ |
| 277.0827 | 277.0971 | 51.81     | 1 | 6801.76   | C15 H14 O5 | (M+H)+ |
| 364.1537 |          |           | 1 | 145810.13 |            |        |
| 482.2733 |          |           | 1 | 253623.7  |            |        |
| 484.2892 |          |           | 1 | 402137.13 |            |        |
| 485.2924 |          |           | 1 | 112582.14 |            |        |
| 538.2994 |          |           | 1 | 157812.19 |            |        |

MSMS Spectrum

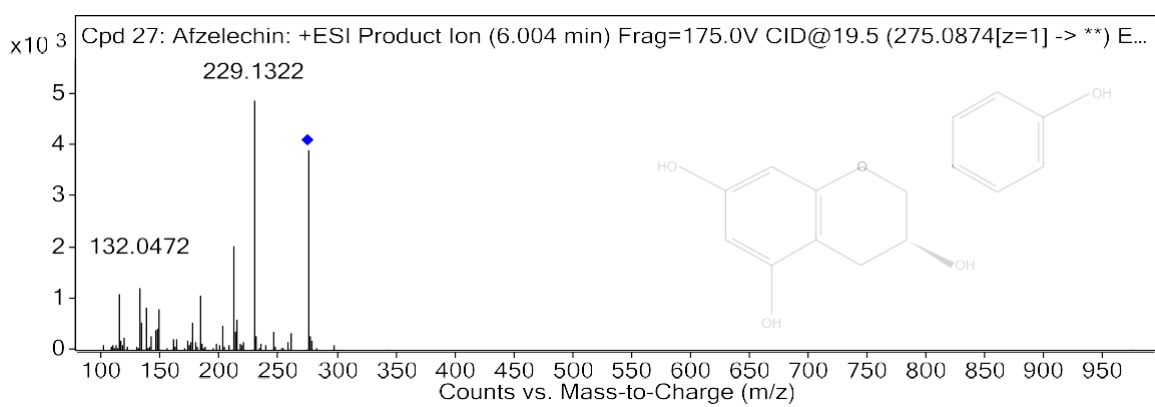

MS/MS Spectrum Peak List

| m/z      | z | Abund   |
|----------|---|---------|
| 114.0359 | 1 | 1101.94 |
| 132.0472 |   | 1223.56 |
| 137.0594 |   | 842.76  |
| 148.0734 |   | 824.45  |
| 176.0701 | 1 | 568.87  |
| 183.0936 |   | 1090.31 |
| 211.0878 | 1 | 2052.14 |
| 214.1088 |   | 616.13  |
| 229.1322 | 1 | 4885.18 |
| 275.1378 | 2 | 3902.95 |

Compound Structure

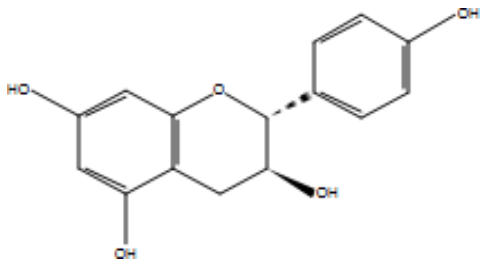

Qualitative Compound Report

9. N-trans-Feruloyl-4-O- methyl dopamine

| Compound Label                               | Name                                 | m/z     | RT   | Algorithm  | Mass     |
|----------------------------------------------|--------------------------------------|---------|------|------------|----------|
| Cpd 31: N-trans-Feruloyl-4-O-methyl dopamine | N-trans-Feruloyl-4-O-methyl dopamine | 344.145 | 6.22 | Auto MS/MS | 343.1368 |

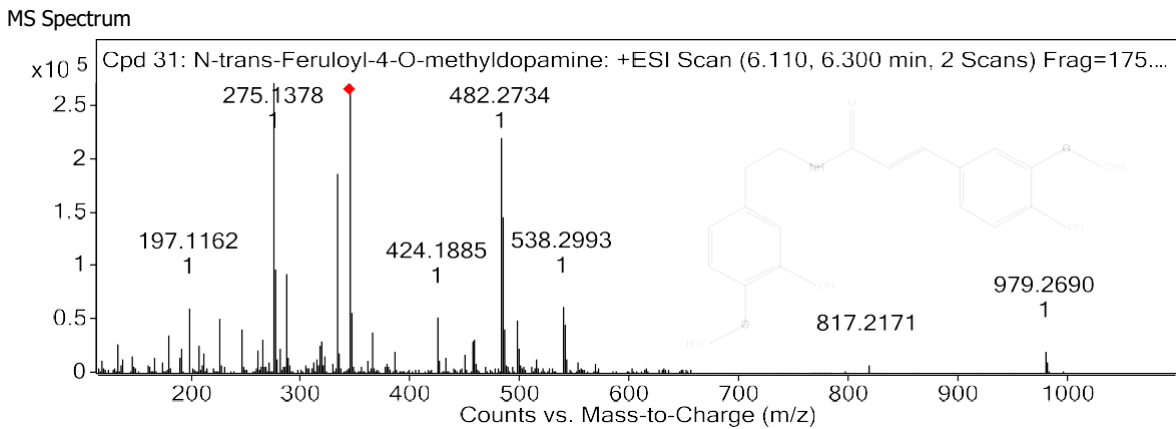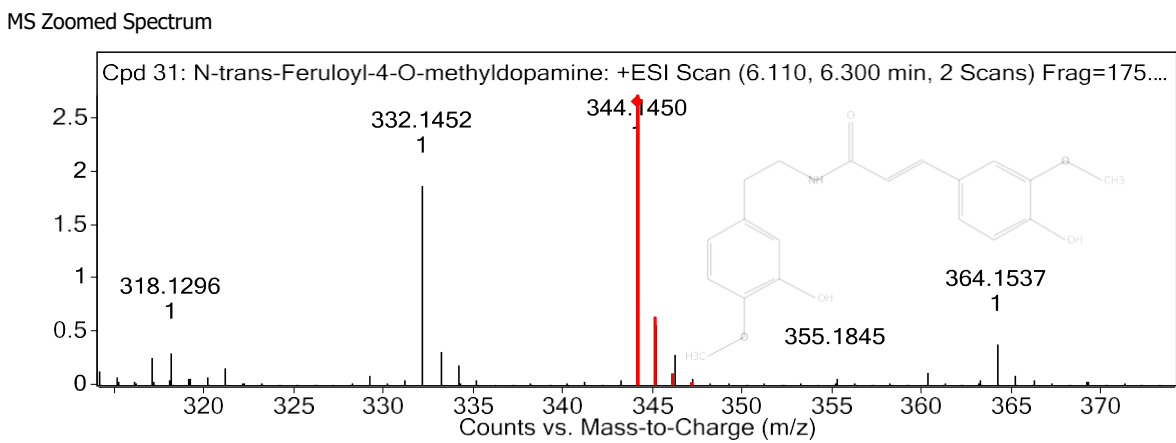

MS Spectrum Peak List

| m/z      | Calc m/z | Diff(ppm) | z | Abund     | Formula      | Ion    |
|----------|----------|-----------|---|-----------|--------------|--------|
| 275.1378 |          |           | 1 | 571047.75 |              |        |
| 276.1412 |          |           | 1 | 97709.88  |              |        |
| 287.0537 |          |           | 1 | 93658.8   |              |        |
| 332.1452 |          |           | 1 | 186949.41 |              |        |
| 344.145  | 344.1492 | 12.27     | 1 | 270902.28 | C19 H21 N O5 | (M+H)+ |
| 345.1478 | 345.1525 | 13.86     | 1 | 56634.5   | C19 H21 N O5 | (M+H)+ |
| 346.1423 | 346.1551 | 36.78     | 1 | 29624.39  | C19 H21 N O5 | (M+H)+ |
| 347.1467 | 347.1577 | 31.56     | 1 | 6722.36   | C19 H21 N O5 | (M+H)+ |
| 482.2734 |          |           | 1 | 220230.81 |              |        |
| 484.2887 |          |           | 1 | 146356.28 |              |        |

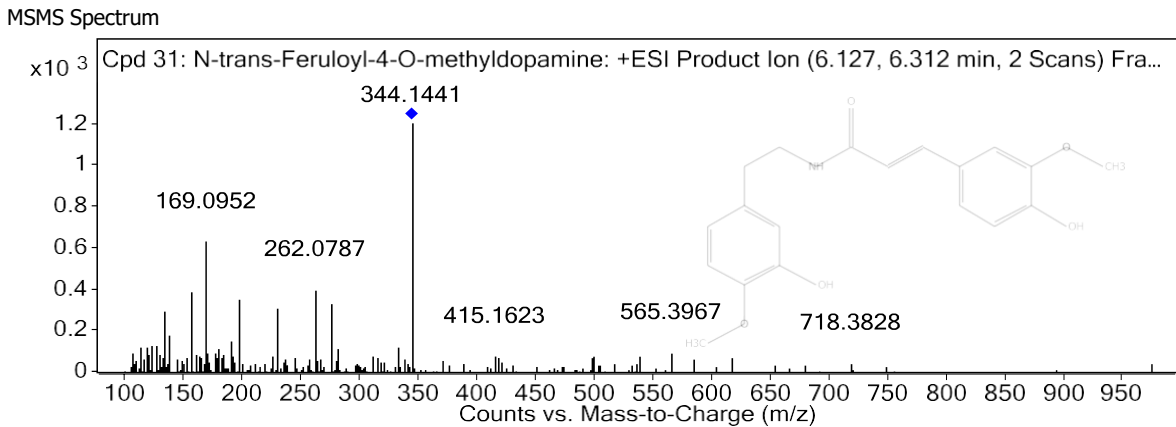

MS/MS Spectrum Peak List

| m/z      | z | Abund  |
|----------|---|--------|
| 133.101  |   | 298.63 |
| 137.0937 | 1 | 176.7  |
| 156.0867 |   | 389.06 |
| 169.0952 | 1 | 631.5  |
| 197.1251 |   | 354.49 |

| m/z      | z | Abund   |
|----------|---|---------|
| 229.0977 |   | 312.37  |
| 262.0787 | 1 | 399.99  |
| 275.136  | 1 | 328.15  |
| 344.1441 | 2 | 1205.86 |
| 345.1472 | 2 | 234.76  |

Compound Structure

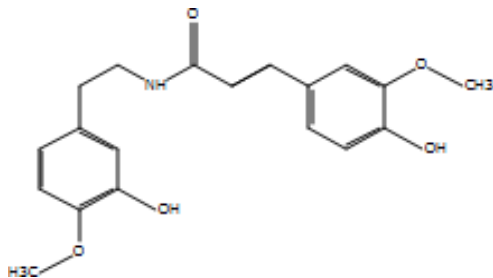

Qualitative Compound Report

10.(±)-Rollipyrrole

| Compound Label           | Name             | m/z      | RT    | Algorithm  | Mass     |
|--------------------------|------------------|----------|-------|------------|----------|
| Cpd 34: (±)-Rollipyrrole | (±)-Rollipyrrole | 289.1536 | 6.853 | Auto MS/MS | 288.1463 |

MS Spectrum

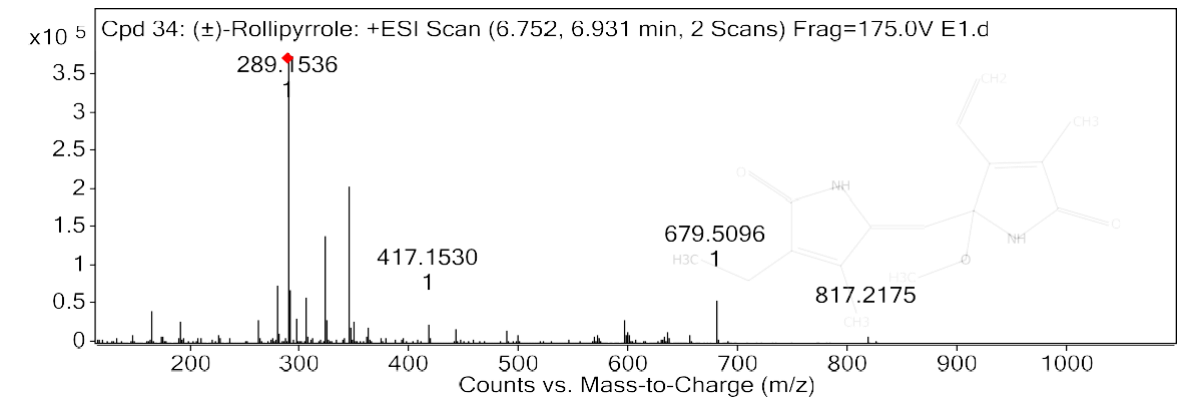

MS Zoomed Spectrum

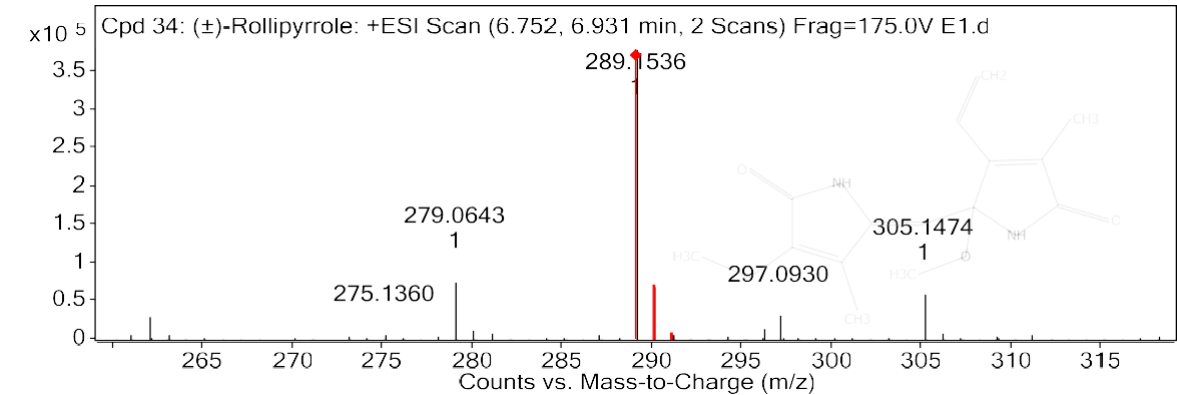

MS Spectrum Peak List

| m/z      | Calc m/z | Diff(ppm) | z | Abund     | Formula       | Ion    |
|----------|----------|-----------|---|-----------|---------------|--------|
| 164.0189 |          |           |   | 43488.3   |               |        |
| 279.0643 |          |           | 1 | 76725     |               |        |
| 289.1536 | 289.1547 | 3.84      | 1 | 380285.22 | C16 H20 N2 O3 | (M+H)+ |
| 290.1567 | 290.1578 | 3.69      | 1 | 71316.08  | C16 H20 N2 O3 | (M+H)+ |
| 291.1585 | 291.1604 | 6.57      | 1 | 8650.25   | C16 H20 N2 O3 | (M+H)+ |
| 305.1474 |          |           | 1 | 61204.59  |               |        |
| 323.1377 |          |           | 1 | 141345.27 |               |        |
| 344.1448 |          |           | 1 | 205775.28 |               |        |
| 345.1477 |          |           | 1 | 38102.88  |               |        |
| 679.5096 |          |           | 1 | 56228.59  |               |        |

MSMS Spectrum

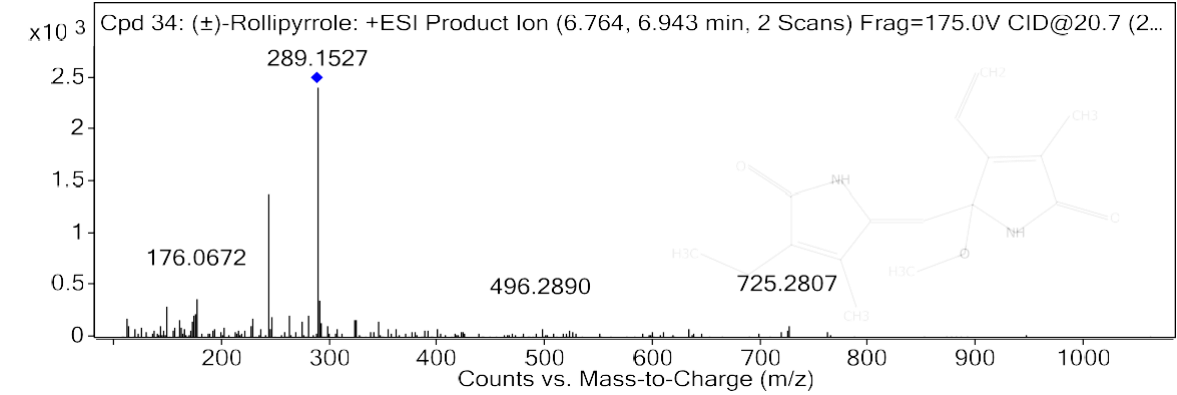

MS/MS Spectrum Peak List

| m/z      | z | Abund   |
|----------|---|---------|
| 148.0745 |   | 297.49  |
| 174.0526 |   | 211.85  |
| 175.0853 |   | 235.96  |
| 176.0672 |   | 368.08  |
| 243.1479 | 1 | 1381.61 |
| 245.0875 | 1 | 199.73  |
| 262.1033 |   | 218.4   |
| 279.0594 |   | 222.05  |
| 289.1527 | 1 | 2409.6  |
| 290.157  | 1 | 356.01  |

Compound Structure

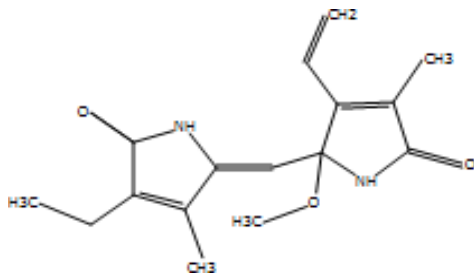



Qualitative Compound Report

11.N6-cis-p- Coumaroylserotonin

| Compound Label                      | Name | m/z      | RT    | Algorithm  | Mass     |
|-------------------------------------|------|----------|-------|------------|----------|
| Cpd 36: N6-cis-p-Coumaroylserotonin |      | 323.1379 | 7.024 | Auto MS/MS | 322.1306 |

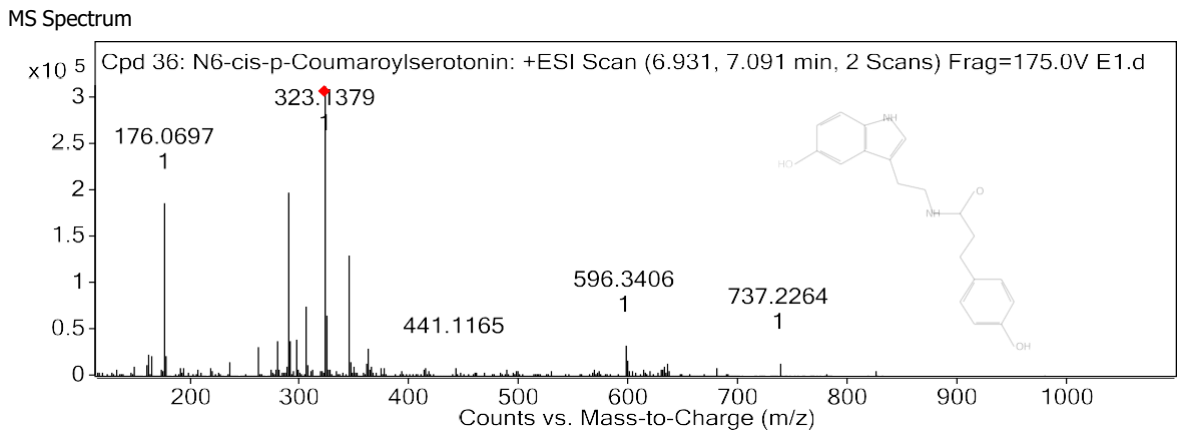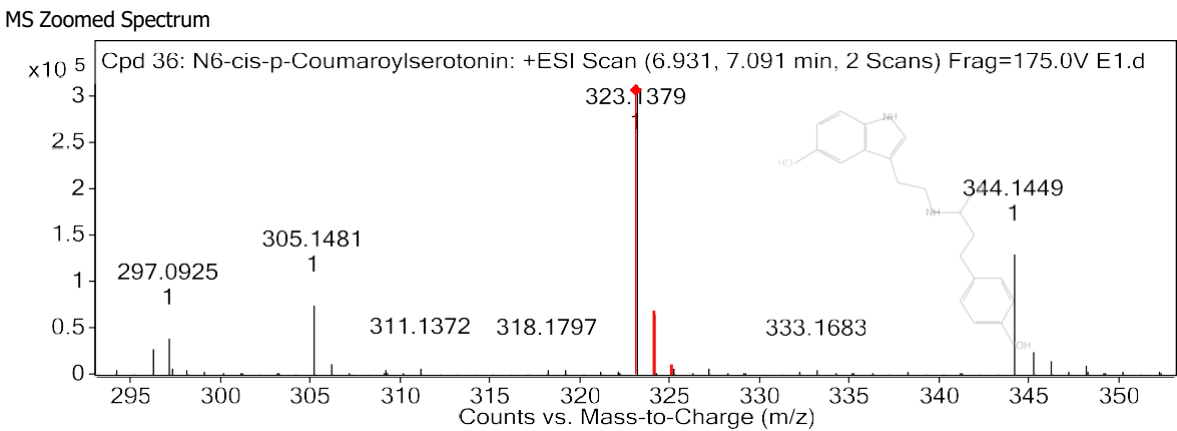

MS Spectrum Peak List

| m/z      | Calc m/z | Diff(ppm) | z | Abund     | Formula       | Ion    |
|----------|----------|-----------|---|-----------|---------------|--------|
| 176.0697 |          |           | 1 | 187442.75 |               |        |
| 279.0644 |          |           | 1 | 38416.14  |               |        |
| 289.1536 |          |           | 1 | 198736.88 |               |        |
| 290.1566 |          |           | 1 | 38135.68  |               |        |
| 297.0925 |          |           | 1 | 39906.24  |               |        |
| 305.1481 |          |           | 1 | 75507.7   |               |        |
| 323.1379 | 323.139  | 3.57      | 1 | 313297.84 | C19 H18 N2 O3 | (M+H)+ |
| 324.1408 | 324.1422 | 4.39      | 1 | 66862.52  | C19 H18 N2 O3 | (M+H)+ |
| 325.1439 | 325.1449 | 3.08      | 1 | 8663.55   | C19 H18 N2 O3 | (M+H)+ |
| 344.1449 |          |           | 1 | 130385.67 |               |        |

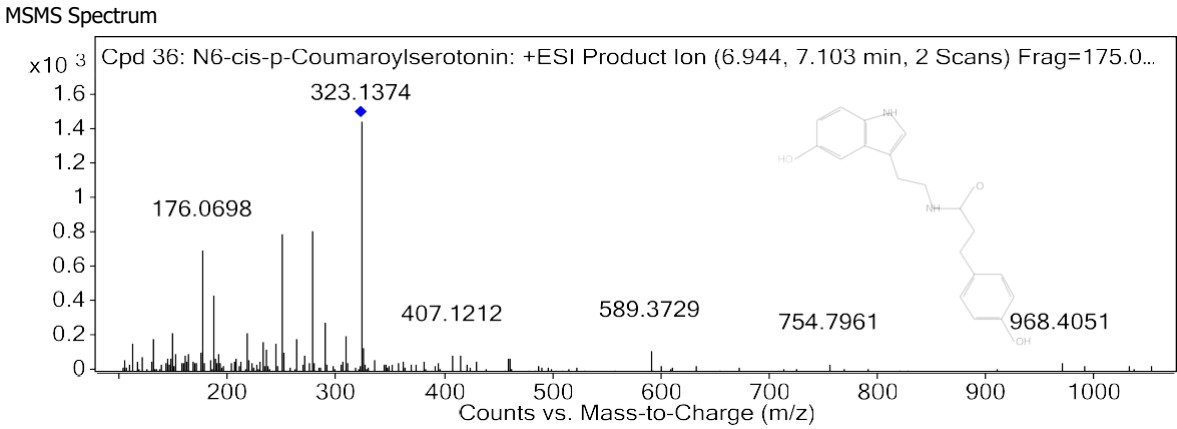

MS/MS Spectrum Peak List

| m/z      | z | Abund   |
|----------|---|---------|
| 130.0639 |   | 194.98  |
| 148.074  |   | 222.42  |
| 176.0698 |   | 703.97  |
| 186.0792 | 1 | 444.4   |
| 217.0598 | 1 | 222.92  |
| 250.1206 | 1 | 800.58  |
| 277.1309 | 1 | 814.05  |
| 289.1553 | 1 | 290.36  |
| 308.1156 |   | 209.24  |
| 323.1374 | 1 | 1451.81 |

Compound Structure

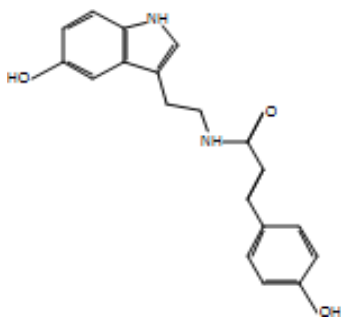



Qualitative Compound Report

12. 1-Methoxy-1H-indole- 3-carboxaldehyde

| Compound Label                               | Name                                 | m/z      | RT   | Algorithm  | Mass     |
|----------------------------------------------|--------------------------------------|----------|------|------------|----------|
| Cpd 37: 1-Methoxy-1H-indole-3-carboxaldehyde | 1-Methoxy-1H-indole-3-carboxaldehyde | 176.0697 | 7.09 | Auto MS/MS | 175.0625 |

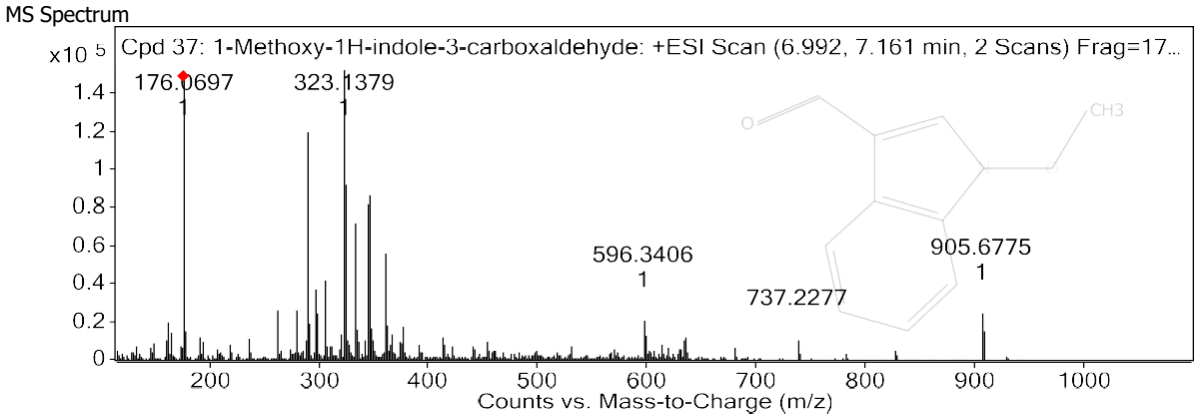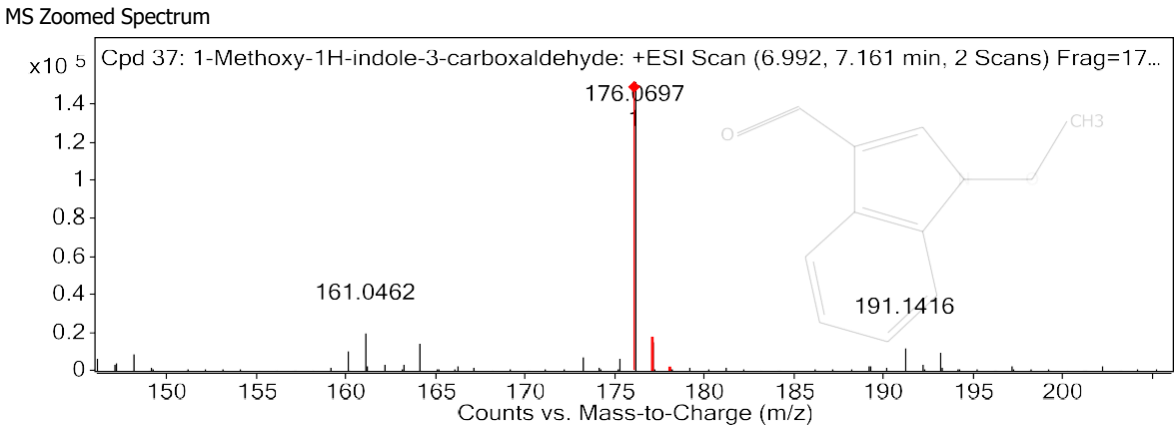

MS Spectrum Peak List

| m/z      | Calc m/z | Diff(ppm) | z | Abund     | Formula     | Ion    |
|----------|----------|-----------|---|-----------|-------------|--------|
| 176.0697 | 176.0706 | 4.87      | 1 | 152657.19 | C10 H9 N O2 | (M+H)+ |
| 177.0728 | 177.0738 | 5.73      | 1 | 15654.78  | C10 H9 N O2 | (M+H)+ |
| 178.0773 | 178.0761 | -6.98     | 1 | 1771.43   | C10 H9 N O2 | (M+H)+ |
| 289.1535 |          |           | 1 | 120112.23 |             |        |
| 323.1379 |          |           | 1 | 448656.88 |             |        |
| 324.1411 |          |           | 1 | 92780.34  |             |        |
| 333.1651 |          |           | 1 | 72210.33  |             |        |
| 344.145  |          |           | 1 | 82523.17  |             |        |
| 346.1603 |          |           | 1 | 87347.2   |             |        |
| 360.2155 |          |           | 1 | 56769.48  |             |        |

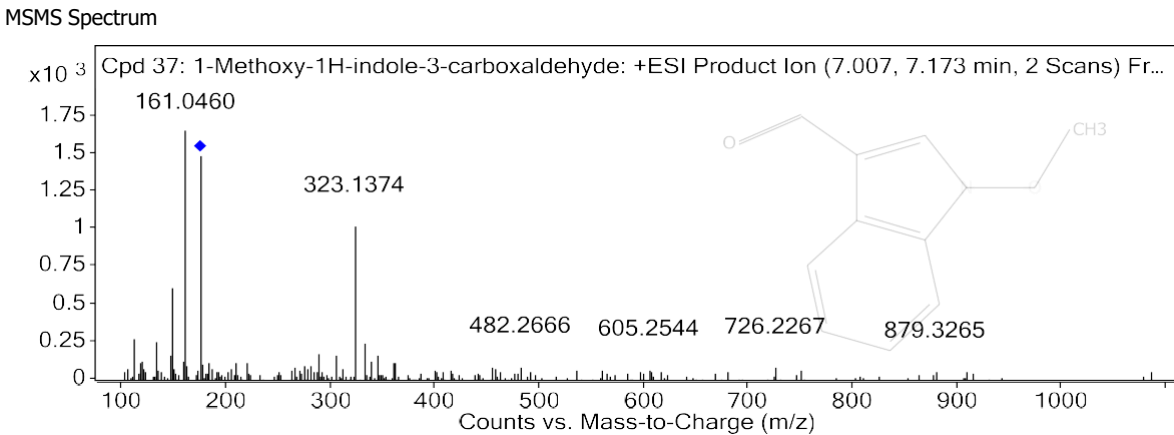

MS/MS Spectrum Peak List

| m/z      | z | Abund   |
|----------|---|---------|
| 111.0429 |   | 279.72  |
| 133.052  | 1 | 261.78  |
| 146.0623 |   | 173.42  |
| 148.0743 | 1 | 617.08  |
| 160.0384 |   | 474.19  |
| 161.046  | 1 | 1658.19 |
| 176.0691 | 1 | 1490.61 |
| 289.1558 |   | 180.66  |
| 323.1374 | 1 | 1024.93 |
| 333.1673 |   | 249.48  |

Compound Structure

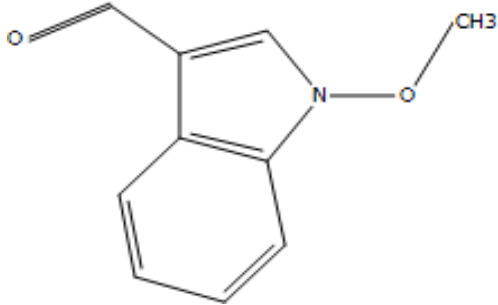

Qualitative Compound Report

13.(10Z,14E,16E)- 10,14,16-Octadecatrien-12- ynoic acid

| Compound Label                                             | Name                                               | m/z      | RT    | Algorithm  | Mass    |
|------------------------------------------------------------|----------------------------------------------------|----------|-------|------------|---------|
| Cpd 41: (10Z,14E,16E)-10,14,16-Octadecatrien-12-ynoic acid | (10Z,14E,16E)-10,14,16-Octadecatrien-12-ynoic acid | 275.1991 | 8.672 | Auto MS/MS | 274.192 |

MS Spectrum

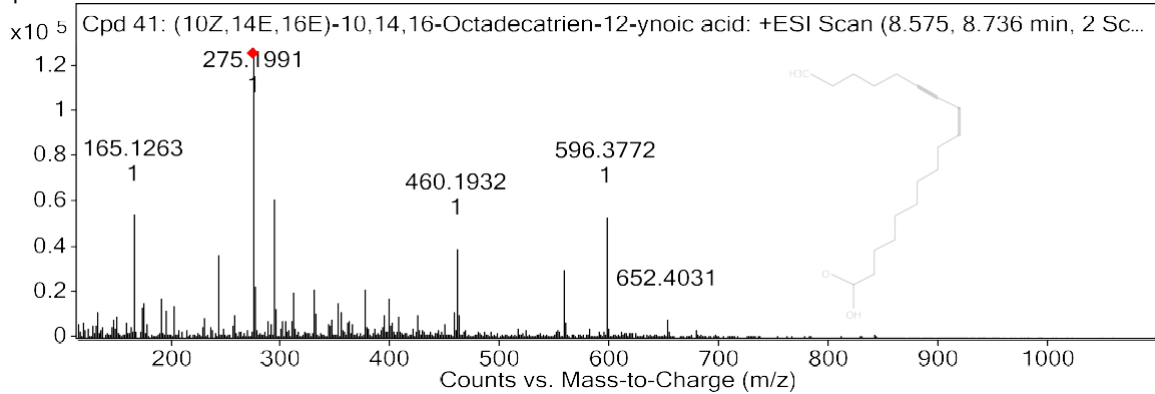

MS Zoomed Spectrum

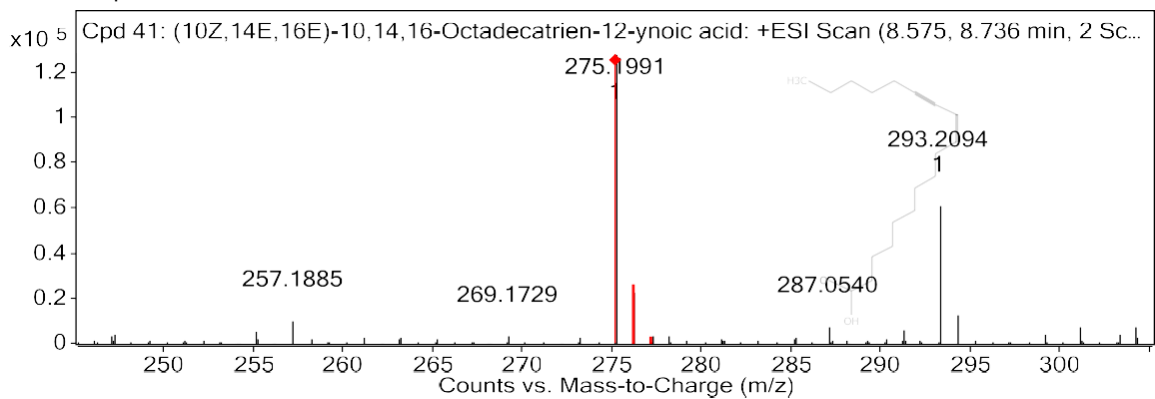

MS Spectrum Peak List

| m/z      | Calc m/z | Diff(ppm) | z | Abund     | Formula    | Ion    |
|----------|----------|-----------|---|-----------|------------|--------|
| 165.1263 |          |           | 1 | 54683.75  |            |        |
| 242.2828 |          |           | 1 | 37290.71  |            |        |
| 275.1991 | 275.2006 | 5.32      | 1 | 128396.67 | C18 H26 O2 | (M+H)+ |
| 276.2027 | 276.204  | 4.51      | 1 | 23482.82  | C18 H26 O2 | (M+H)+ |
| 277.2097 | 277.2069 | -10.14    | 1 | 3975.47   | C18 H26 O2 | (M+H)+ |
| 293.2094 |          |           | 1 | 61671.11  |            |        |
| 376.1166 |          |           | 1 | 22008.62  |            |        |
| 460.1932 |          |           | 1 | 39823.35  |            |        |
| 557.1457 |          |           | 1 | 30466.36  |            |        |
| 596.3772 |          |           | 1 | 53871.45  |            |        |

MSMS Spectrum

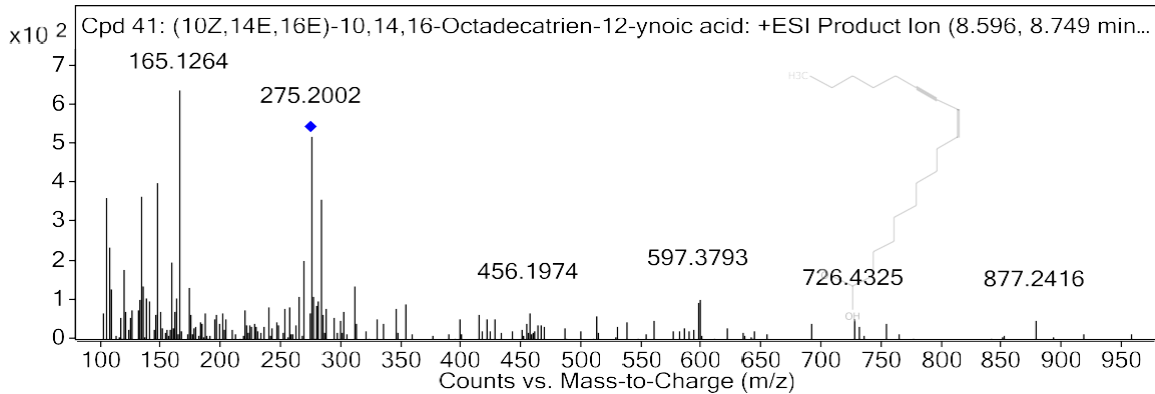

MS/MS Spectrum Peak List

| m/z      | z | Abund  |
|----------|---|--------|
| 105.0697 |   | 362.65 |
| 107.0846 |   | 236.65 |
| 119.0838 |   | 179.48 |
| 133.1001 |   | 366.1  |
| 147.1165 |   | 402.09 |
| 159.1155 |   | 198.02 |
| 165.1264 |   | 638.17 |
| 268.0705 |   | 203.78 |
| 275.2002 | 1 | 518.97 |
| 283.094  | 1 | 359.94 |

Compound Structure

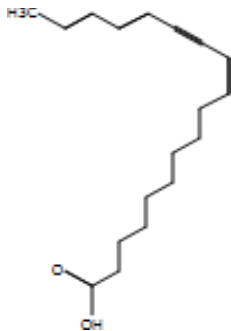

Qualitative Compound Report

14.3,4',5,6,8- Pentamethoxyflavone

| Compound Label                         | Name                           | m/z      | RT     | Algorithm  | Mass     |
|----------------------------------------|--------------------------------|----------|--------|------------|----------|
| Cpd 47: 3,4',5,6,8-Pentamethoxyflavone | 3,4',5,6,8-Pentamethoxyflavone | 373.1264 | 11.085 | Auto MS/MS | 372.1191 |

MS Spectrum

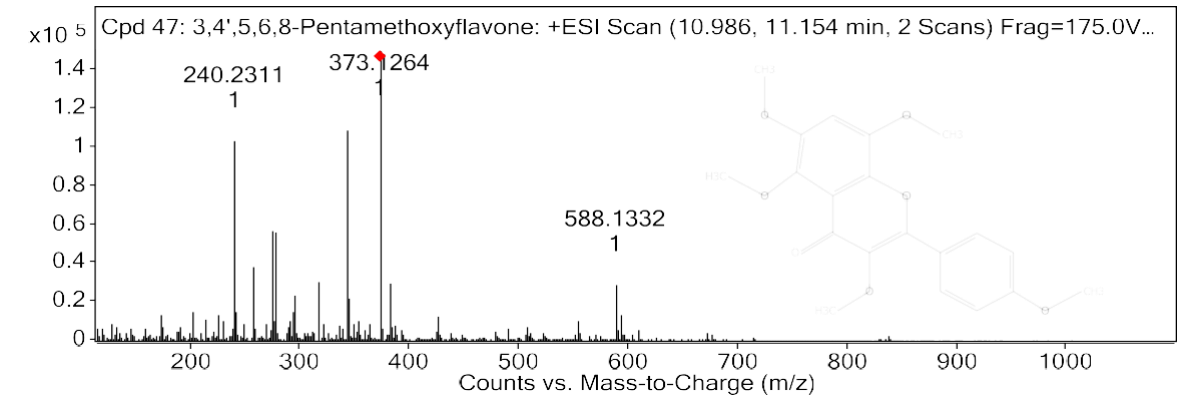

MS Zoomed Spectrum

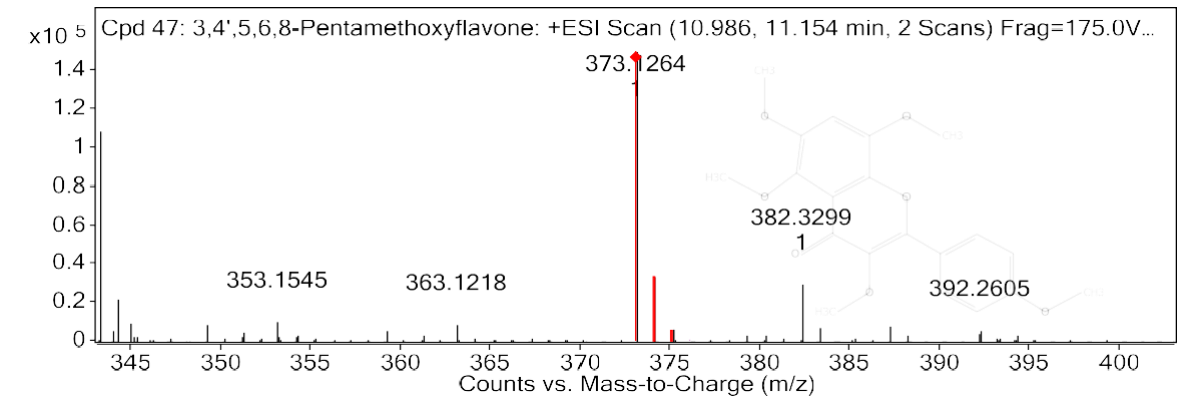

MS Spectrum Peak List

| m/z      | Calc m/z | Diff(ppm) | z | Abund     | Formula    | Ion    |
|----------|----------|-----------|---|-----------|------------|--------|
| 240.2311 |          |           | 1 | 103634.71 |            |        |
| 257.1887 |          |           | 1 | 38998.97  |            |        |
| 275.1988 |          |           | 1 | 57326.45  |            |        |
| 277.2144 |          |           | 1 | 56825.9   |            |        |
| 316.2828 |          |           | 1 | 30835.76  |            |        |
| 343.0076 |          |           | 1 | 39962.27  |            |        |
| 343.2939 |          |           | 1 | 108983.25 |            |        |
| 373.1264 | 373.1282 | 4.86      | 1 | 150299.31 | C20 H20 O7 | (M+H)+ |
| 374.1296 | 374.1316 | 5.36      | 1 | 34222.18  | C20 H20 O7 | (M+H)+ |
| 375.1334 | 375.134  | 1.54      | 1 | 7030.86   | C20 H20 O7 | (M+H)+ |

MSMS Spectrum

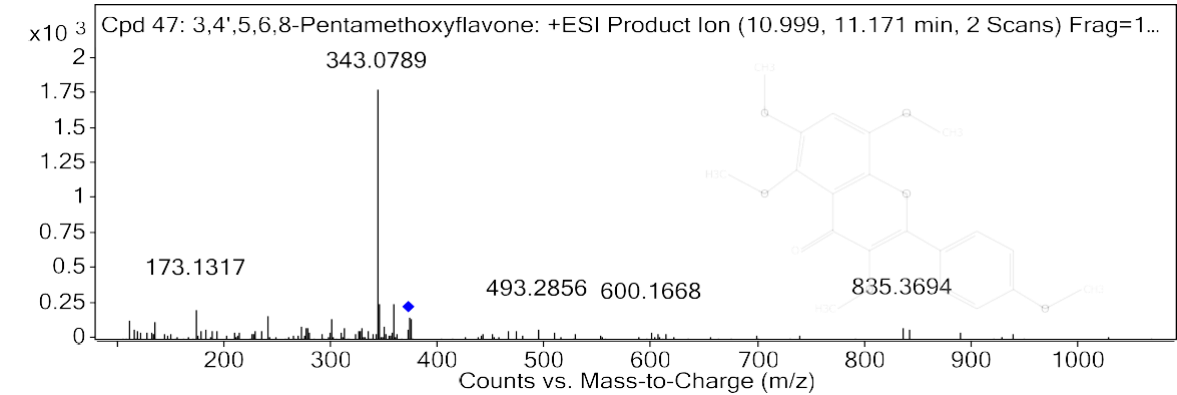

MS/MS Spectrum Peak List

| m/z      | z | Abund   |
|----------|---|---------|
| 111.0802 |   | 144.01  |
| 135.1156 |   | 130.71  |
| 173.1317 |   | 218.86  |
| 240.2287 |   | 174.64  |
| 300.0633 |   | 152.52  |
| 343.0789 | 1 | 1786.33 |
| 344.0843 | 1 | 261.44  |
| 358.101  |   | 254.49  |
| 373.1273 |   | 163.04  |
| 374.1289 |   | 144.27  |

Compound Structure

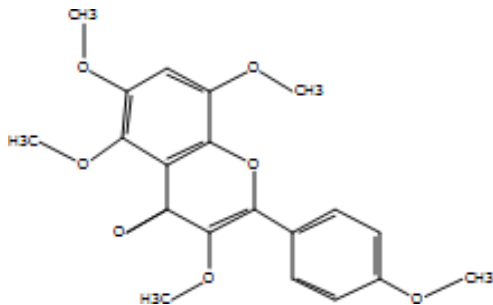

Qualitative Compound Report

15. Terminaline

| Compound Label      | Name        | m/z      | RT     | Algorithm  | Mass     |
|---------------------|-------------|----------|--------|------------|----------|
| Cpd 48: Terminaline | Terminaline | 364.3195 | 12.545 | Auto MS/MS | 363.3122 |

MS Spectrum

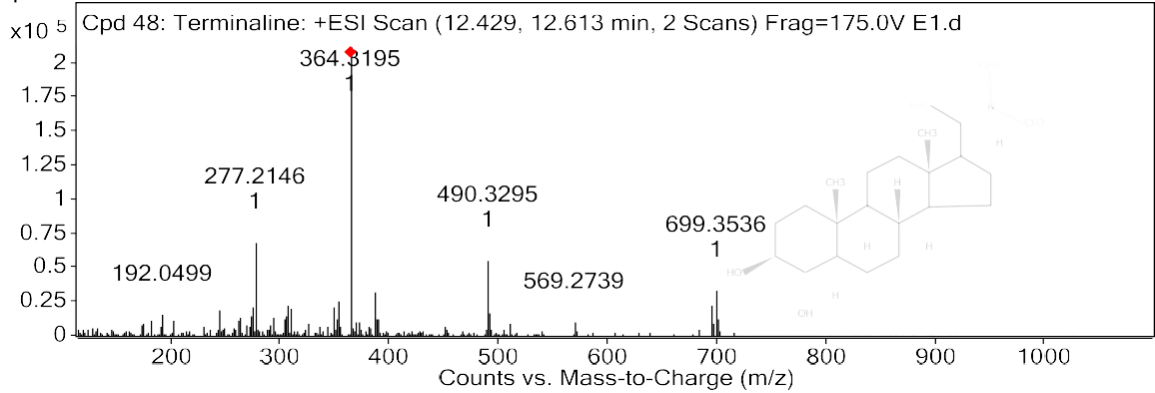

MS Zoomed Spectrum

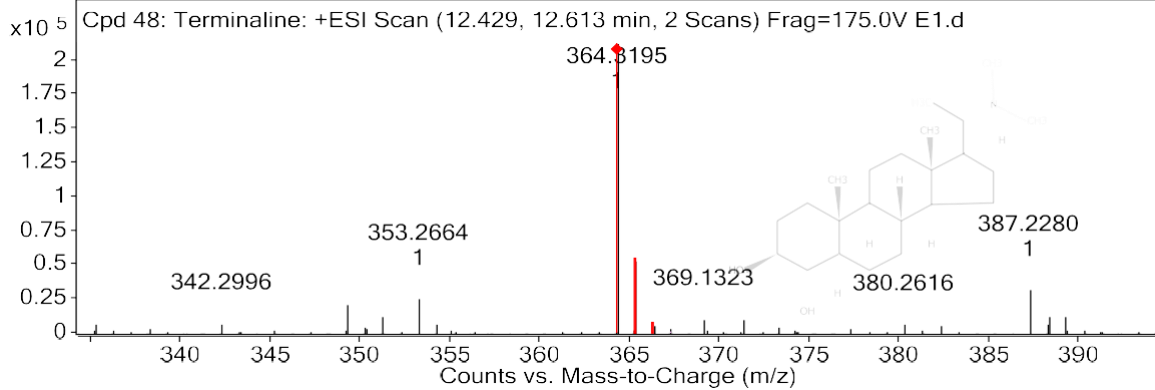

MS Spectrum Peak List

| m/z      | Calc m/z | Diff(ppm) | z | Abund     | Formula      | Ion    |
|----------|----------|-----------|---|-----------|--------------|--------|
| 277.2146 |          |           | 1 | 69223.59  |              |        |
| 307.0951 |          |           |   | 23004.31  |              |        |
| 353.2664 |          |           | 1 | 25965.64  |              |        |
| 364.3195 | 364.321  | 4.2       | 1 | 212781.45 | C23 H41 N O2 | (M+H)+ |
| 365.3228 | 365.3243 | 4.07      | 1 | 53703.81  | C23 H41 N O2 | (M+H)+ |
| 366.3256 | 366.3274 | 4.82      | 1 | 6519.13   | C23 H41 N O2 | (M+H)+ |
| 387.228  |          |           | 1 | 32502.81  |              |        |
| 490.3295 |          |           | 1 | 55913.27  |              |        |
| 694.3981 |          |           | 1 | 22894.61  |              |        |
| 699.3536 |          |           | 1 | 33799.69  |              |        |

MSMS Spectrum

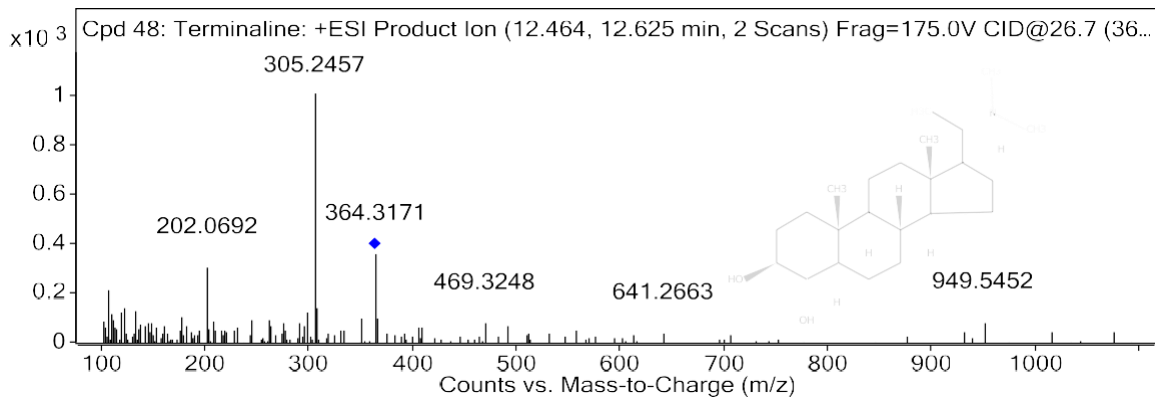

MS/MS Spectrum Peak List

| m/z      | z | Abund   |
|----------|---|---------|
| 107.0851 |   | 217.03  |
| 109.0626 |   | 121.84  |
| 119.0843 |   | 128.35  |
| 121.0946 |   | 143     |
| 133.1011 |   | 135.12  |
| 202.0692 |   | 309.36  |
| 298.2733 |   | 128.07  |
| 305.2457 | 1 | 1014.99 |
| 306.2541 | 1 | 146.23  |
| 364.3171 | 1 | 363.77  |

Compound Structure

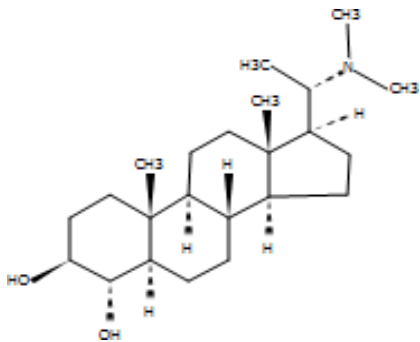

Qualitative Compound Report

16.Palmitic amide

| Compound Label         | Name           | m/z      | RT     | Algorithm  | Mass     |
|------------------------|----------------|----------|--------|------------|----------|
| Cpd 69: Palmitic amide | Palmitic amide | 256.2627 | 16.877 | Auto MS/MS | 255.2554 |

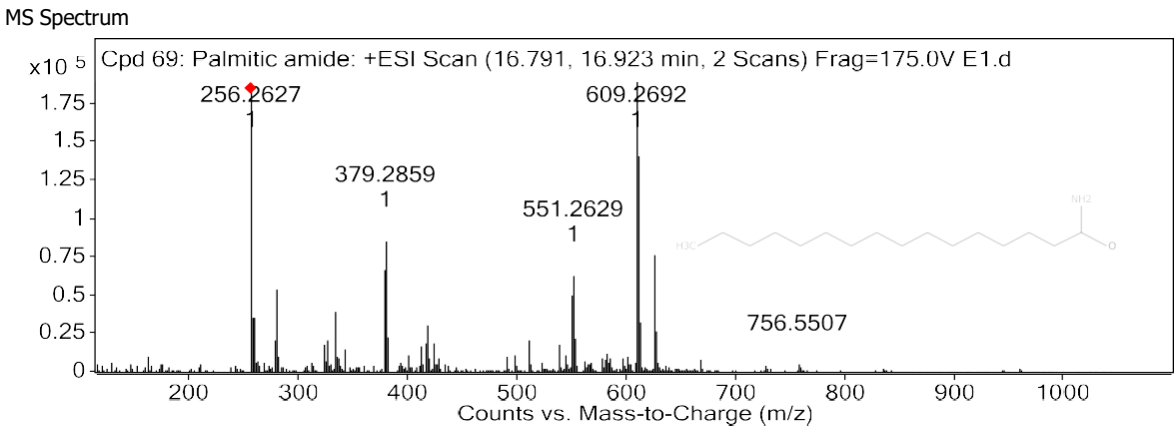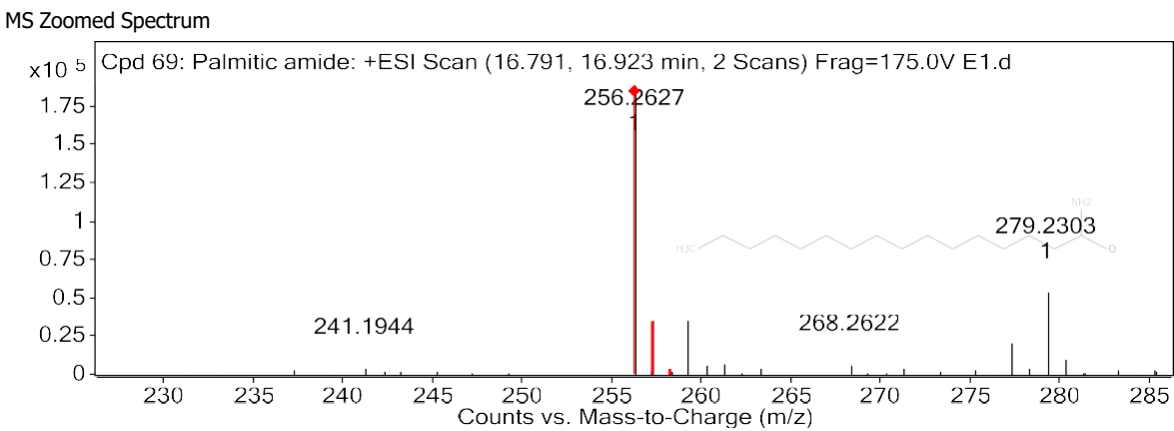

MS Spectrum Peak List

| m/z      | Calc m/z | Diff(ppm) | z | Abund     | Formula     | Ion    |
|----------|----------|-----------|---|-----------|-------------|--------|
| 256.2627 | 256.2635 | 3.15      | 1 | 189479.02 | C16 H33 N O | (M+H)+ |
| 257.266  | 257.2668 | 3.03      | 1 | 35867.96  | C16 H33 N O | (M+H)+ |
| 258.2691 | 258.2698 | 2.75      | 1 | 3374.17   | C16 H33 N O | (M+H)+ |
| 279.2303 |          |           | 1 | 54571.22  |             |        |
| 378.2984 |          |           |   | 67069.73  |             |        |
| 379.2859 |          |           | 1 | 86364.88  |             |        |
| 551.2629 |          |           | 1 | 63690.75  |             |        |
| 609.2692 |          |           | 1 | 372537.75 |             |        |
| 610.2721 |          |           | 1 | 141414.7  |             |        |
| 625.2639 |          |           | 1 | 77114.96  |             |        |

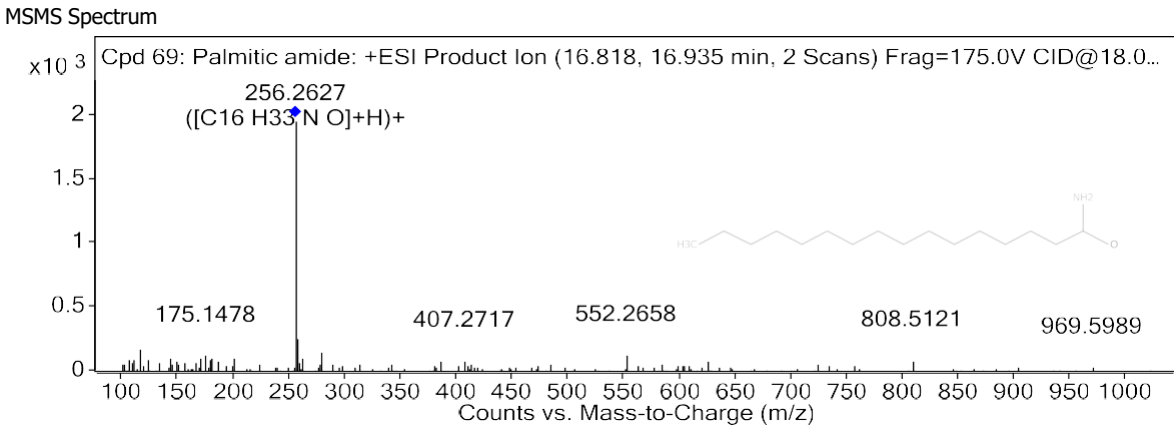

MS/MS Spectrum Peak List

| m/z      | Calc m/z | Diff (ppm) | z | Abund   | Formula     | Ion    |
|----------|----------|------------|---|---------|-------------|--------|
| 117.0695 |          |            |   | 180.95  |             |        |
| 143.0816 |          |            |   | 101.38  |             |        |
| 175.1478 |          |            |   | 123.04  |             |        |
| 181.1167 |          |            |   | 104.46  |             |        |
| 201.1615 |          |            |   | 103.02  |             |        |
| 256.2627 | 256.2635 | 3.19       | 1 | 1953.54 | C16 H33 N O | (M+H)+ |
| 257.2666 |          |            | 1 | 261.55  |             |        |
| 261.2145 |          |            |   | 104.45  |             |        |
| 279.2341 |          |            |   | 151.07  |             |        |
| 552.2658 |          |            |   | 128.32  |             |        |

Compound Structure

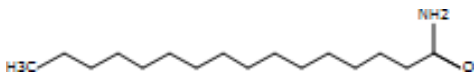

## 17.Oleamide

| Compound Label   | Name     | m/z      | RT     | Algorithm  | Mass     |
|------------------|----------|----------|--------|------------|----------|
| Cpd 71: Oleamide | Oleamide | 282.2778 | 17.242 | Auto MS/MS | 281.2705 |

MS Spectrum

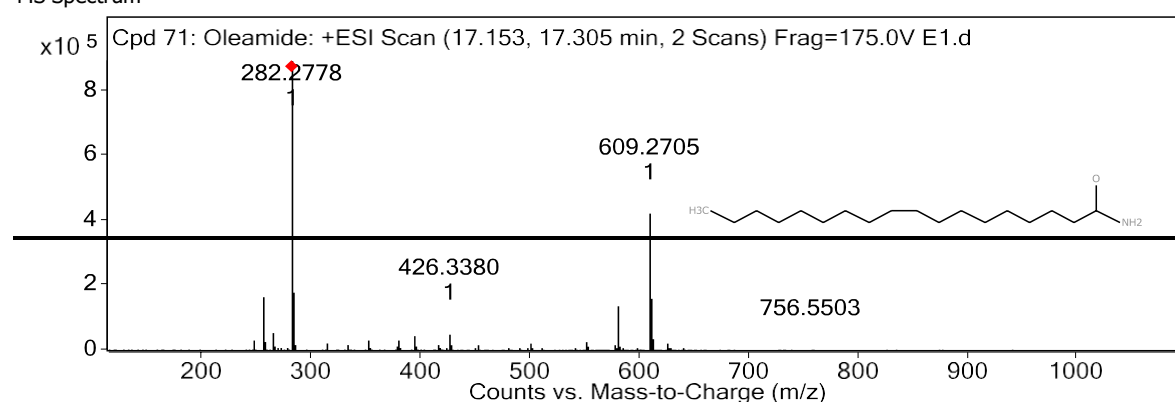

MS Zoomed Spectrum

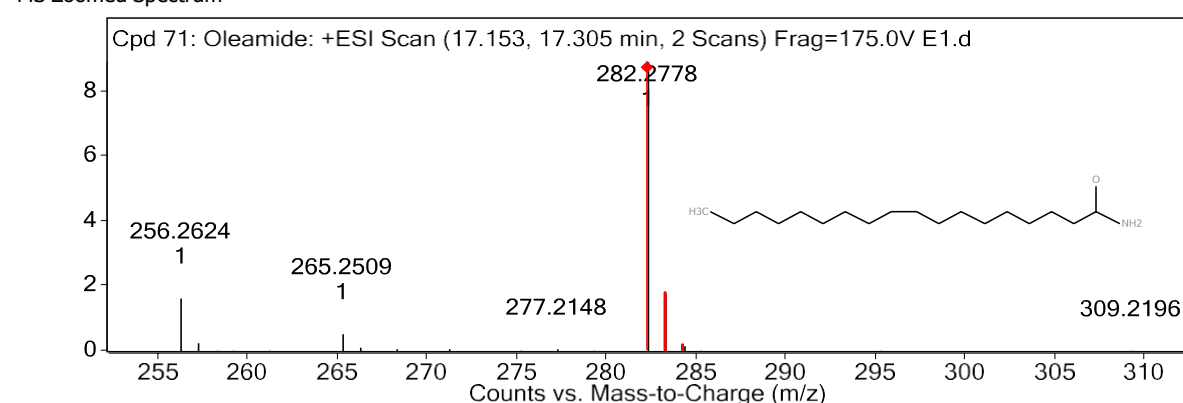

### MS Spectrum Peak List

| m/z      | Calc m/z | Diff(ppm) | z | Abund     | Formula     | Ion    |
|----------|----------|-----------|---|-----------|-------------|--------|
| 256.2624 |          |           | 1 | 167086.52 |             |        |
| 265.2509 |          |           | 1 | 57173.25  |             |        |
| 282.2778 | 282.2791 | 4.84      | 1 | 889493.5  | C18 H35 N O | (M+H)+ |
| 283.2813 | 283.2824 | 3.96      | 1 | 177573.92 | C18 H35 N O | (M+H)+ |
| 284.2847 | 284.2855 | 2.8       | 1 | 18589.79  | C18 H35 N O | (M+H)+ |
| 426.338  |          |           | 1 | 52614.42  |             |        |
| 579.2945 |          |           | 1 | 137876.38 |             |        |
| 580.2973 |          |           | 1 | 52851.59  |             |        |
| 609.2705 |          |           | 1 | 422861.88 |             |        |
| 610.2732 |          |           | 1 | 162752.48 |             |        |

MSMS Spectrum

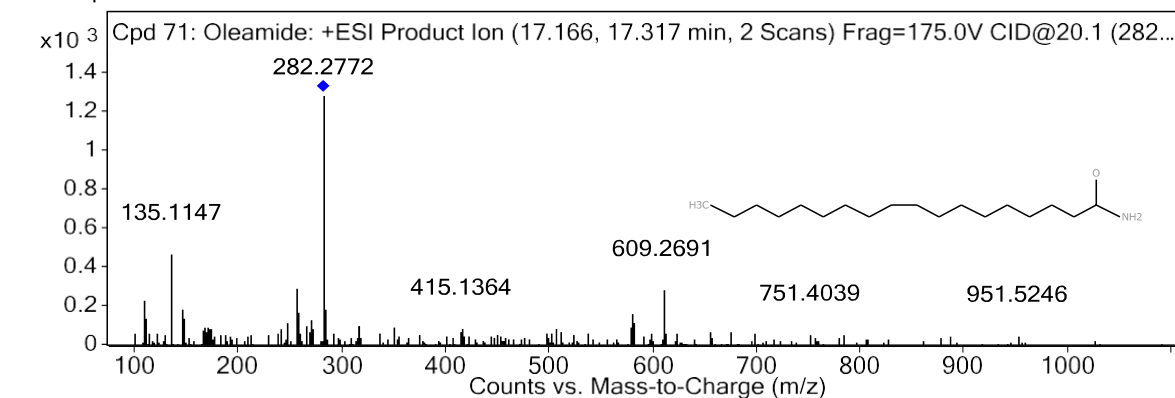

### MS/MS Spectrum Peak List

| $m/z$    | $z$ | Abund   |
|----------|-----|---------|
| 109.1005 |     | 233.63  |
| 135.1147 |     | 470.83  |
| 145.1005 |     | 187.43  |
| 256.2627 |     | 293.62  |
| 257.2685 |     | 170.13  |
| 282.2772 | 1   | 1284.93 |
| 283.2797 | 1   | 182.72  |
| 579.2953 | 1   | 164.03  |
| 609.2691 |     | 284.43  |
| 610.2661 |     | 214.43  |

Compound Structure

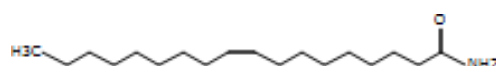

Qualitative Compound Report

18.Pheophorbide a

| Compound Label         | Name           | m/z      | RT     | Algorithm  | Mass     |
|------------------------|----------------|----------|--------|------------|----------|
| Cpd 73: Pheophorbide a | Pheophorbide a | 593.2738 | 17.474 | Auto MS/MS | 592.2665 |

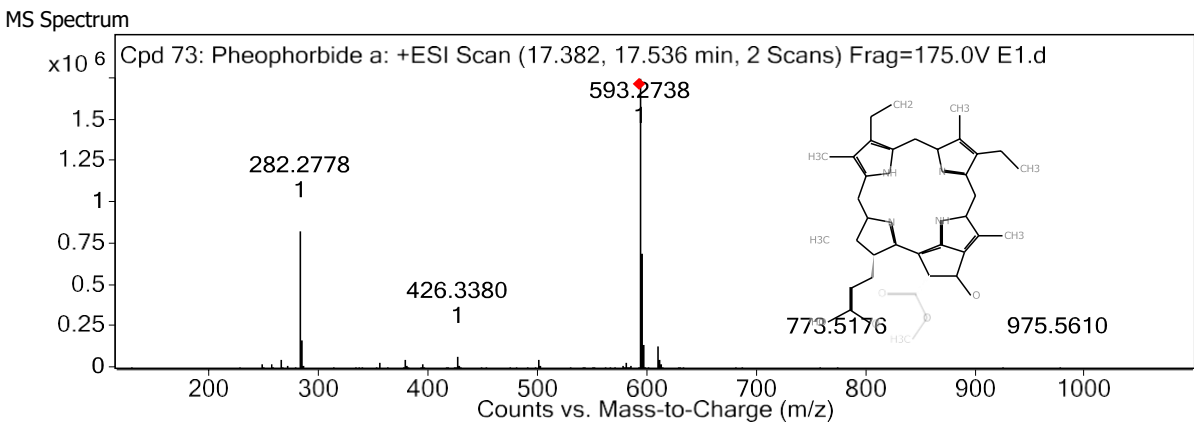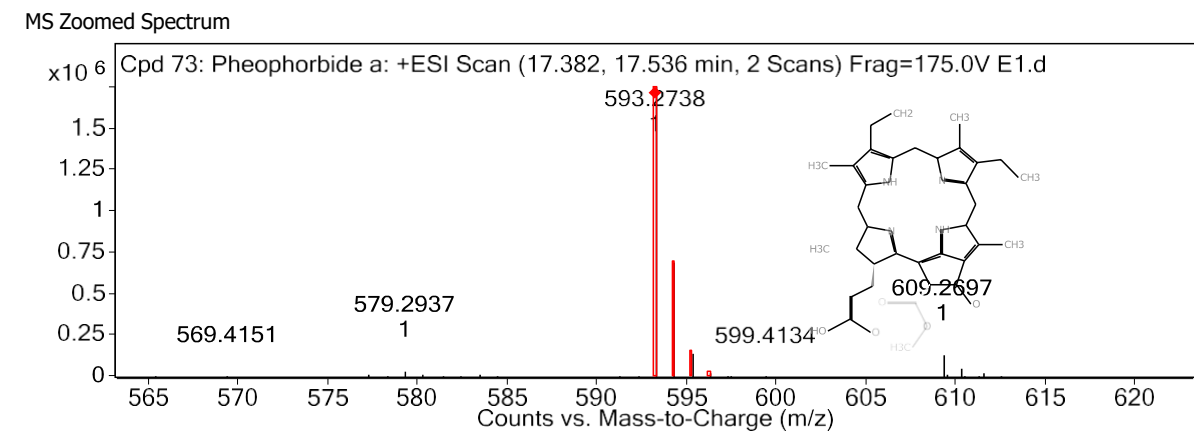

MS Spectrum Peak List

| m/z      | Calc m/z | Diff(ppm) | z | Abund      | Formula       | Ion    |
|----------|----------|-----------|---|------------|---------------|--------|
| 282.2778 |          |           | 1 | 830542.13  |               |        |
| 283.2812 |          |           | 1 | 173045.11  |               |        |
| 378.3348 |          |           | 1 | 55495.14   |               |        |
| 426.338  |          |           | 1 | 69321.65   |               |        |
| 500.4441 |          |           | 1 | 57623.04   |               |        |
| 593.2738 | 593.2758 | 3.49      | 1 | 1750006.63 | C35 H36 N4 O5 | (M+H)+ |
| 594.2768 | 594.279  | 3.65      | 1 | 692155     | C35 H36 N4 O5 | (M+H)+ |
| 595.2802 | 595.2819 | 2.86      | 1 | 140096.31  | C35 H36 N4 O5 | (M+H)+ |
| 596.284  | 596.2847 | 1.19      | 1 | 24364.79   | C35 H36 N4 O5 | (M+H)+ |
| 609.2697 |          |           | 1 | 138188.14  |               |        |

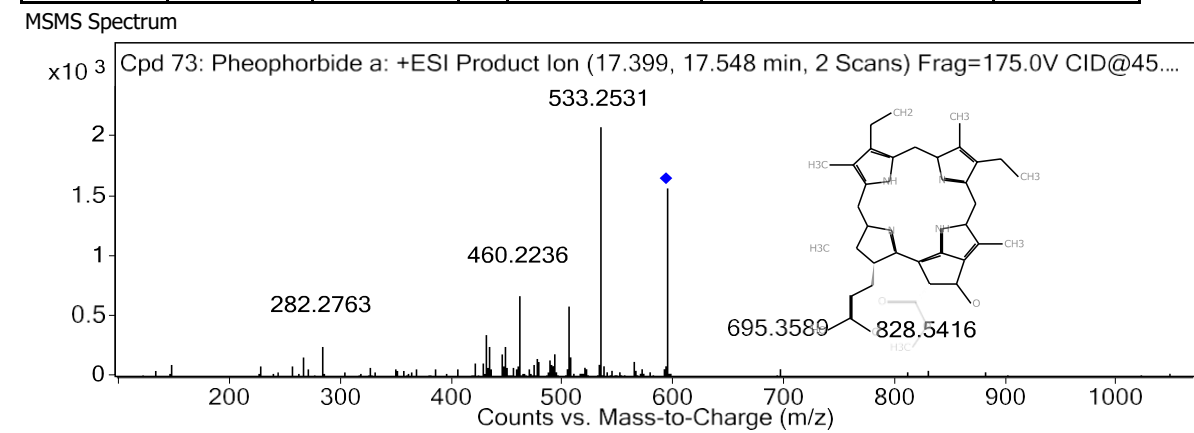

MS/MS Spectrum Peak List

| m/z      | z | Abund   |
|----------|---|---------|
| 282.2763 |   | 254.82  |
| 431.1817 | 1 | 348.57  |
| 433.2377 | 1 | 244.44  |
| 447.2127 |   | 249.51  |
| 460.2236 |   | 667.9   |
| 461.2307 |   | 434.85  |
| 505.2187 |   | 588.91  |
| 533.2531 | 1 | 2081.81 |
| 593.2724 | 1 | 1570.28 |
| 594.2767 | 1 | 193.14  |

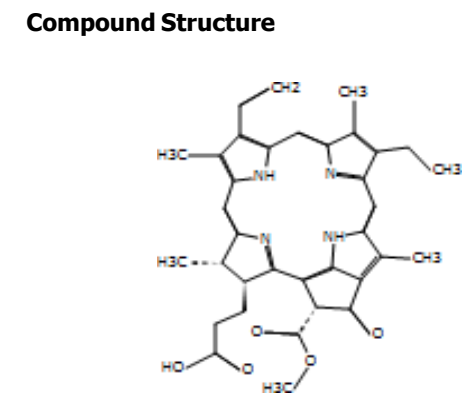



## 19. Pyropheophorbide a

| Compound Label             | Name                      | m/z      | RT     | Algorithm  | Mass     |
|----------------------------|---------------------------|----------|--------|------------|----------|
| Cpd 76: Pyropheophorbide a | <b>Pyropheophorbide a</b> | 535.2688 | 17.918 | Auto MS/MS | 534.2615 |

MS Spectrum

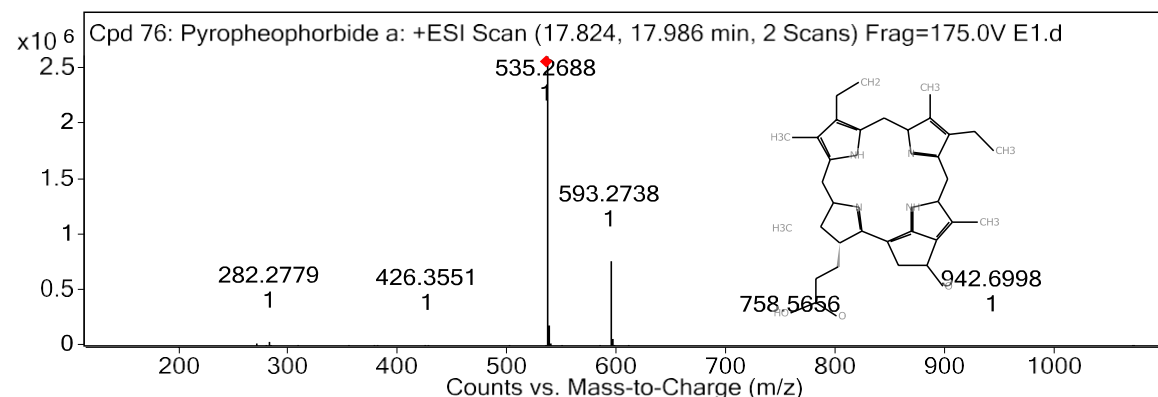

MS Zoomed Spectrum

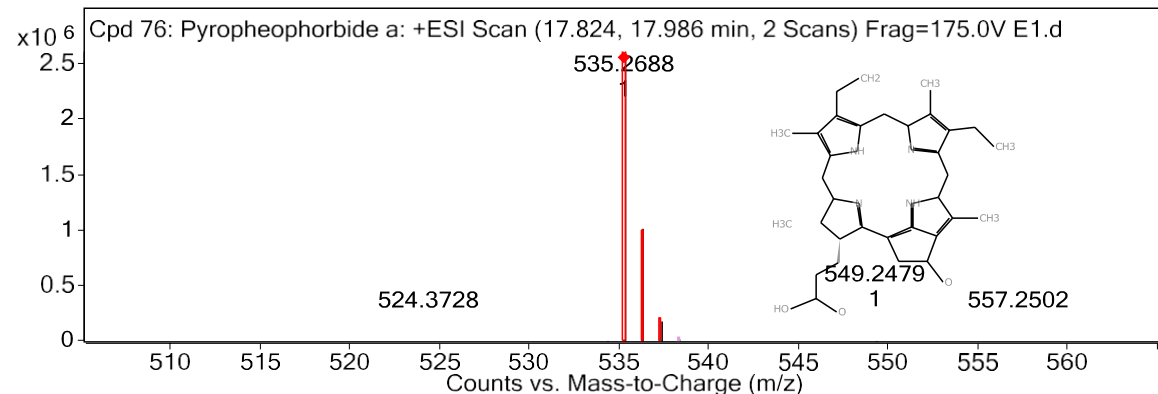

### MS Spectrum Peak List

| m/z      | Calc m/z | Diff(ppm) | z | Abund      | Formula       | Ion    |
|----------|----------|-----------|---|------------|---------------|--------|
| 270.2776 |          |           | 1 | 22432.38   |               |        |
| 282.2779 |          |           | 1 | 39346.35   |               |        |
| 500.4437 |          |           | 1 | 18362.78   |               |        |
| 535.2688 | 535.2704 | 2.88      | 1 | 2610777.5  | C33 H34 N4 O3 | (M+H)+ |
| 536.2717 | 536.2735 | 3.44      | 1 | 1026844.75 | C33 H34 N4 O3 | (M+H)+ |
| 537.2751 | 537.2765 | 2.59      | 1 | 188548.89  | C33 H34 N4 O3 | (M+H)+ |
| 538.2777 |          |           | 1 | 25045.81   |               |        |
| 593.2738 |          |           | 1 | 773113.69  |               |        |
| 594.2775 |          |           | 1 | 300161.22  |               |        |
| 595.2804 |          |           | 1 | 62518.8    |               |        |

MSMS Spectrum

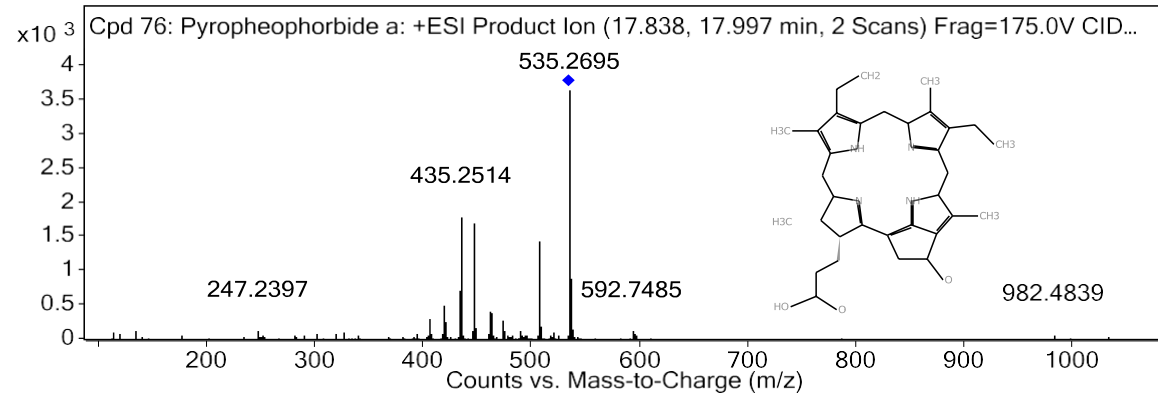

### MS/MS Spectrum Peak List

| m/z      | z | Abund   |
|----------|---|---------|
| 419.2234 | 1 | 511.17  |
| 433.1992 | 1 | 712.74  |
| 433.2335 |   | 425.71  |
| 434.2451 |   | 899.33  |
| 435.2514 | 1 | 1802.99 |
| 447.216  | 1 | 1709.91 |
| 461.2314 | 1 | 423.19  |
| 507.2728 | 1 | 1454.36 |
| 535.2695 | 1 | 3658.77 |
| 536.2718 | 1 | 905.38  |

### Compound Structure

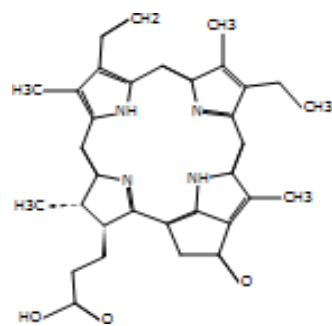



## Negative Analysis

Qualitative Compound Report

20.Glucoraphanin

| Compound Label       | Name          | m/z      | RT    | Algorithm  | Mass     |
|----------------------|---------------|----------|-------|------------|----------|
| Cpd 2: Glucoraphanin | Glucoraphanin | 436.0367 | 1.124 | Auto MS/MS | 437.0439 |

MS Spectrum

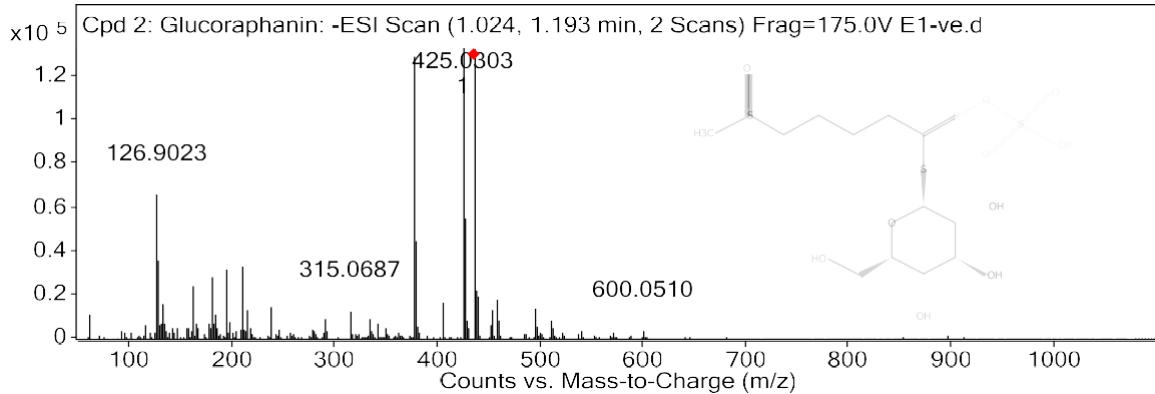

MS Zoomed Spectrum

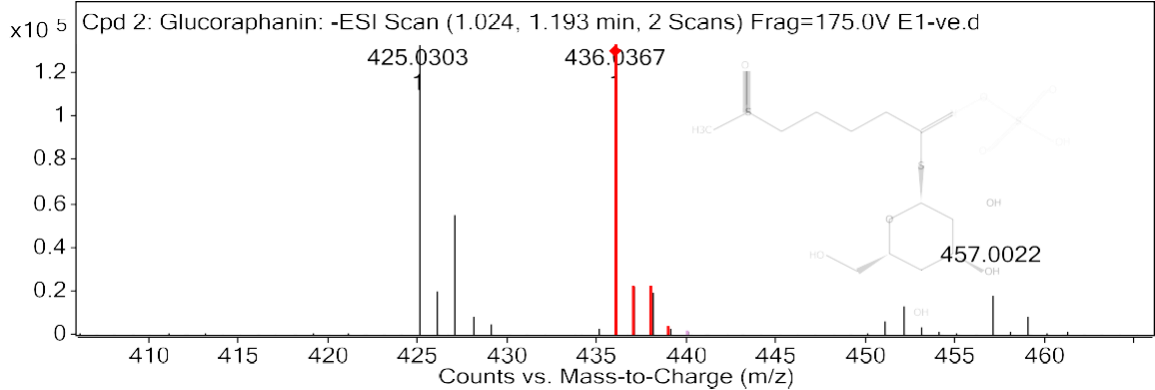

MS Spectrum Peak List

| m/z      | Calc m/z | Diff(ppm) | z | Abund     | Formula          | Ion    |
|----------|----------|-----------|---|-----------|------------------|--------|
| 126.9023 |          |           |   | 66650.58  |                  |        |
| 128.0328 |          |           |   | 36052.26  |                  |        |
| 377.0812 |          |           | 1 | 129898.73 |                  |        |
| 379.0791 |          |           | 1 | 45399.72  |                  |        |
| 425.0303 |          |           | 1 | 134423.22 |                  |        |
| 427.0273 |          |           | 1 | 55857.03  |                  |        |
| 436.0367 | 436.0411 | 10.18     | 1 | 133187.59 | C12 H23 N O10 S3 | (M-H)- |
| 437.0388 | 437.0438 | 11.51     | 1 | 22653.03  | C12 H23 N O10 S3 | (M-H)- |
| 438.0339 | 438.0387 | 10.84     | 1 | 20003.11  | C12 H23 N O10 S3 | (M-H)- |
| 439.0378 | 439.0411 | 7.67      | 1 | 3646.8    | C12 H23 N O10 S3 | (M-H)- |

MSMS Spectrum

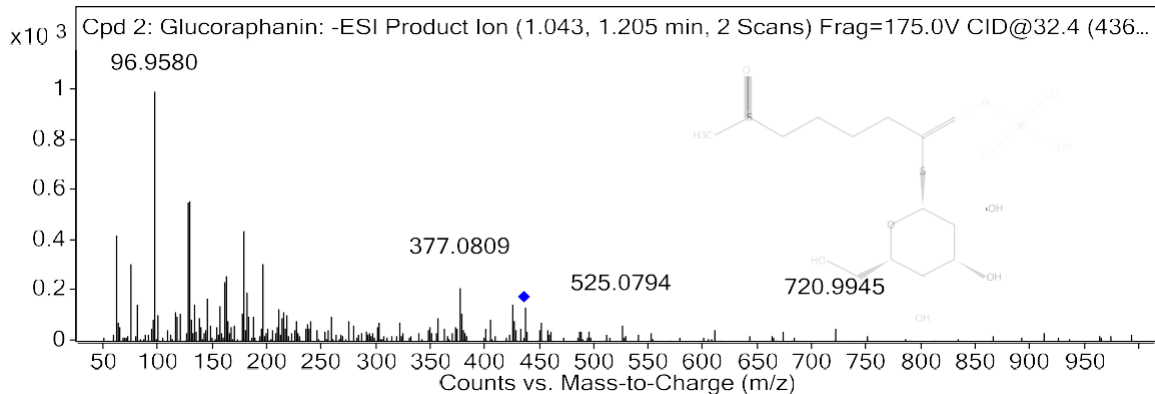

MS/MS Spectrum Peak List

| m/z      | z | Abund  |
|----------|---|--------|
| 61.9856  |   | 420.4  |
| 74.9894  |   | 311.93 |
| 95.9485  |   | 459.41 |
| 96.958   |   | 995.19 |
| 126.9015 |   | 555.99 |
| 128.032  |   | 557.71 |
| 161.0436 |   | 235.41 |
| 162.0201 | 1 | 264.12 |
| 178.0128 | 1 | 442.75 |
| 195.0461 |   | 311.4  |

Compound Structure

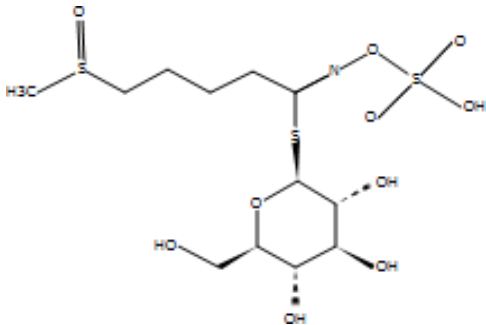

Qualitative Compound Report

21.(S)-2-(Hydroxymethyl)glutar ate

| Compound Label                        | Name                           | m/z      | RT    | Algorithm  | Mass     |
|---------------------------------------|--------------------------------|----------|-------|------------|----------|
| Cpd 3: (S)-2-(Hydroxymethyl)glutarate | (S)-2-(Hydroxymethyl)glutarate | 161.0429 | 1.202 | Auto MS/MS | 162.0501 |

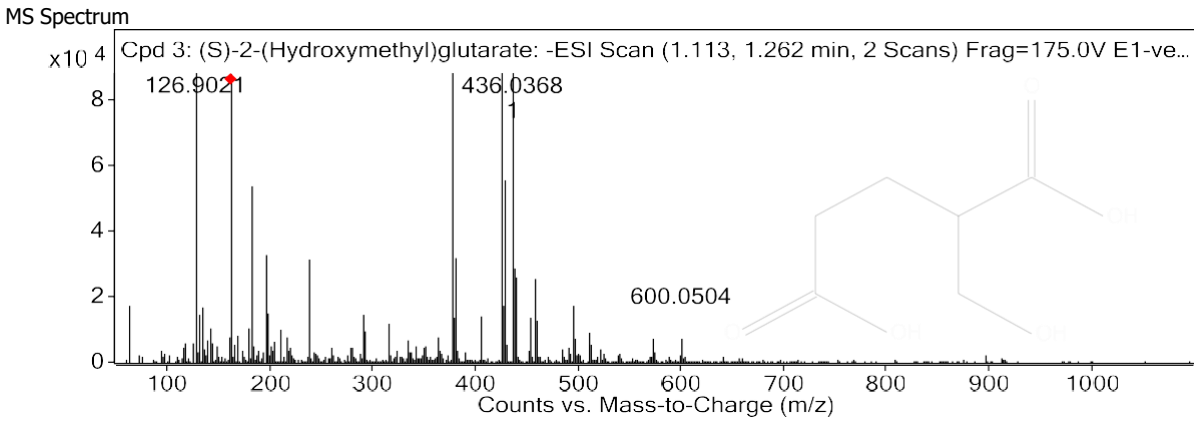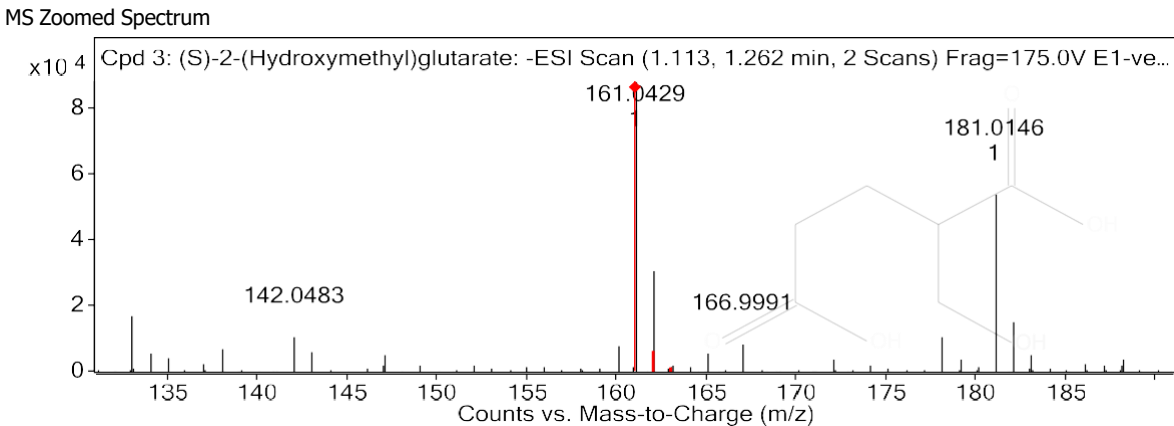

MS Spectrum Peak List

| m/z      | Calc m/z | Diff(ppm) | z | Abund     | Formula   | Ion    |
|----------|----------|-----------|---|-----------|-----------|--------|
| 126.9021 |          |           |   | 99789.22  |           |        |
| 128.0328 |          |           | 1 | 59425.54  |           |        |
| 161.0429 | 161.0455 | 16.2      | 1 | 88201.73  | C6 H10 O5 | (M-H)- |
| 162.0449 | 162.049  | 24.98     | 1 | 7235.87   | C6 H10 O5 | (M-H)- |
| 163.0461 | 163.0502 | 25.05     | 1 | 2053.09   | C6 H10 O5 | (M-H)- |
| 181.0146 |          |           | 1 | 54181.4   |           |        |
| 377.0814 |          |           | 1 | 93757.94  |           |        |
| 425.0301 |          |           | 1 | 125552.94 |           |        |
| 427.0272 |          |           | 1 | 55959.16  |           |        |
| 436.0368 |          |           | 1 | 179343.88 |           |        |

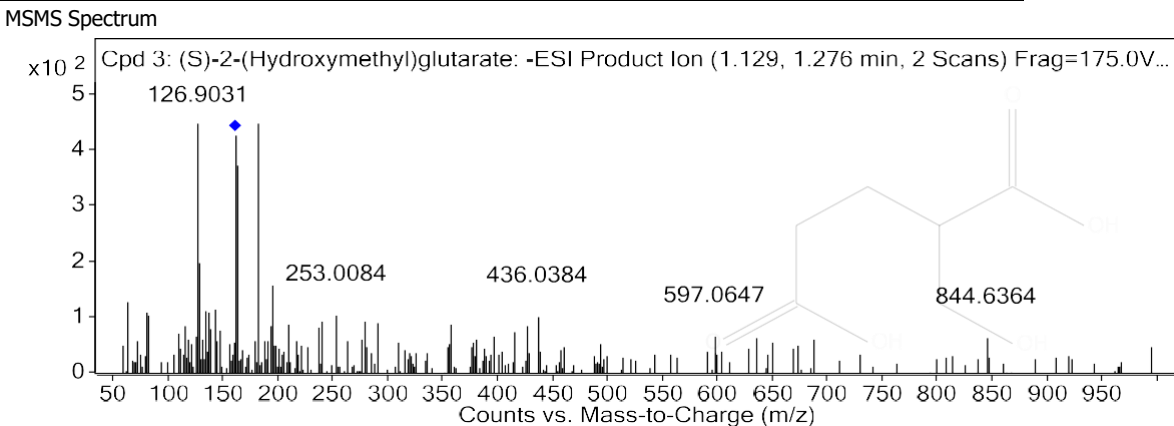

MS/MS Spectrum Peak List

| m/z      | z | Abund  |
|----------|---|--------|
| 61.9864  |   | 127.81 |
| 126.9031 |   | 449.42 |
| 128.0326 |   | 198.91 |
| 134.0441 |   | 112.95 |
| 142.0449 |   | 115.21 |
| 161.0423 |   | 426.26 |
| 162.0216 |   | 372.88 |
| 162.0431 |   | 142    |
| 181.0157 | 1 | 448.17 |
| 195.0462 |   | 158.81 |

Compound Structure

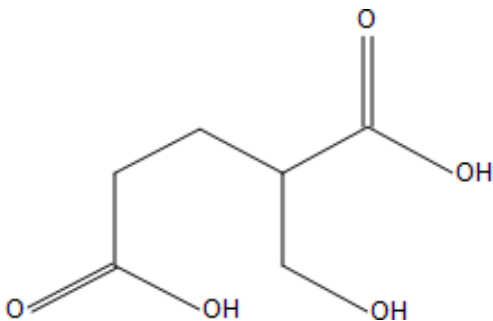

Qualitative Compound Report

22. 2-Deoxy-scylo- inosose

| Compound Label               | Name                  | m/z      | RT    | Algorithm  | Mass     |
|------------------------------|-----------------------|----------|-------|------------|----------|
| Cpd 5: 2-Deoxy-scylo-inosose | 2-Deoxy-scylo-inosose | 161.0431 | 1.485 | Auto MS/MS | 162.0502 |

MS Spectrum

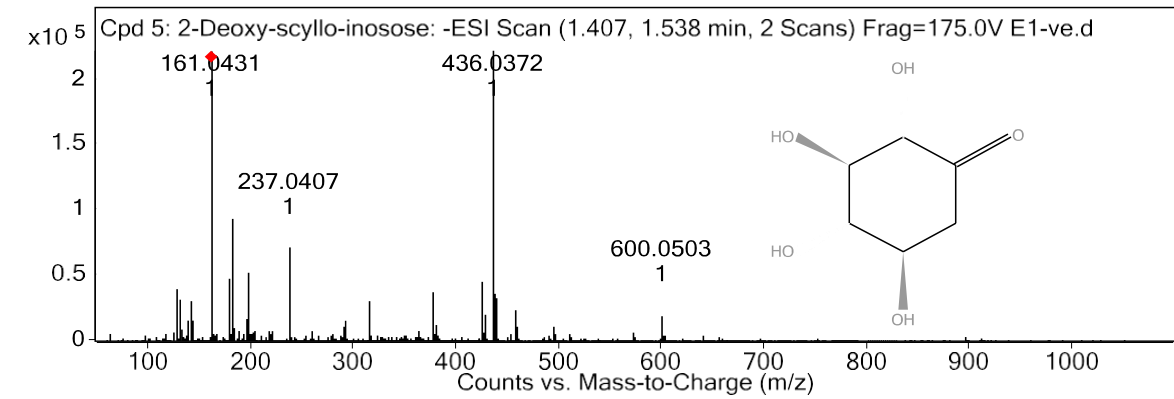

MS Zoomed Spectrum

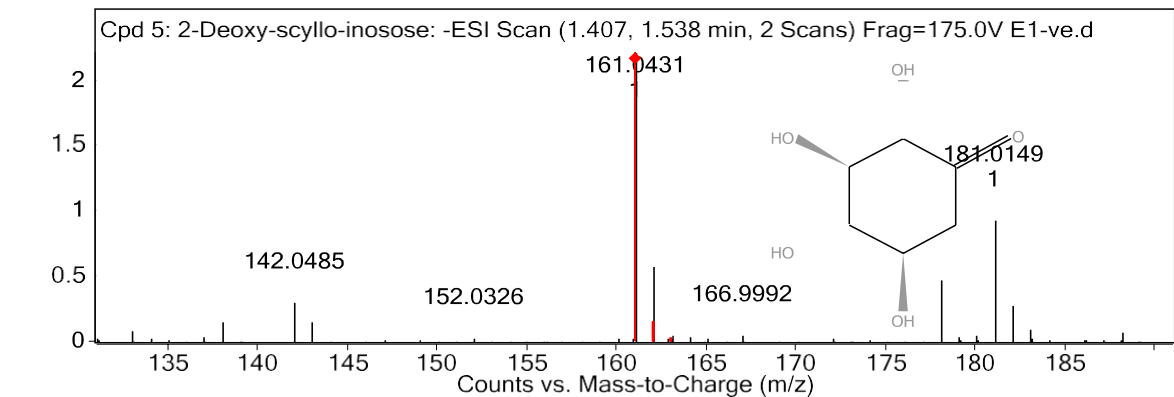

MS Spectrum Peak List

| m/z      | Calc m/z | Diff(ppm) | z | Abund     | Formula   | Ion    |
|----------|----------|-----------|---|-----------|-----------|--------|
| 161.0431 | 161.0455 | 15.32     | 1 | 221169.16 | C6 H10 O5 | (M-H)- |
| 162.0206 |          |           | 1 | 58622.91  |           |        |
| 162.0455 | 162.049  | 21.26     | 1 | 15831.35  | C6 H10 O5 | (M-H)- |
| 163.0449 | 163.0502 | 32.86     | 1 | 5208.62   | C6 H10 O5 | (M-H)- |
| m/z      | Calc m/z | Diff(ppm) | z | Abund     | For       | Ion    |
| 177.9974 |          |           | 1 | 48121.68  |           |        |
| 181.0149 |          |           | 1 | 93657.05  |           |        |
| 196.992  |          |           |   | 52145.2   |           |        |
| 237.0407 |          |           | 1 | 71376.71  |           |        |
| 425.0307 |          |           | 1 | 45480.8   |           |        |
| 436.0372 |          |           | 1 | 226115.59 |           |        |

MSMS Spectrum

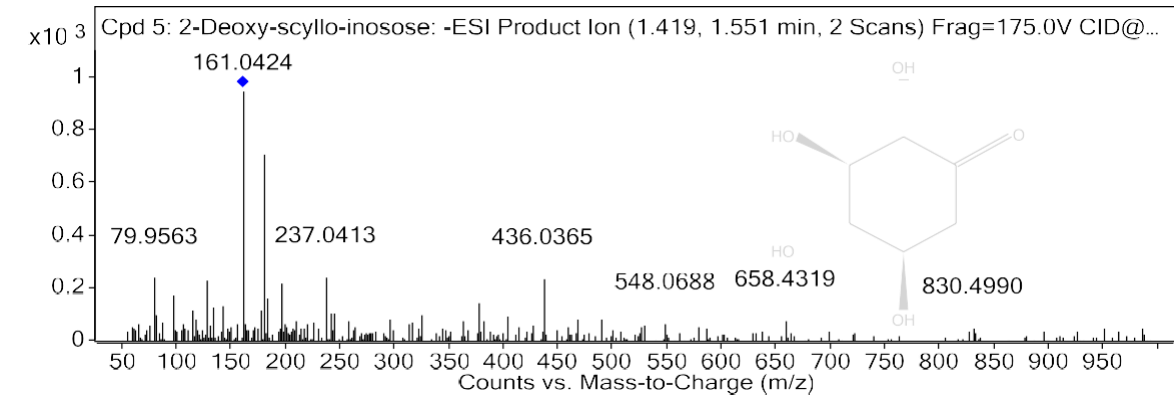

MS/MS Spectrum Peak List

| m/z      | z | Abund  |
|----------|---|--------|
| 79.9563  |   | 242.11 |
| 96.9582  |   | 175.65 |
| 128.031  |   | 229.99 |
| 161.0424 | 1 | 948.92 |
| 162.0189 |   | 480.26 |
| 181.0151 |   | 708.62 |
| 183.0251 |   | 165.56 |
| 196.9927 |   | 218.9  |
| 237.0413 |   | 246.77 |
| 436.0365 | 1 | 239.92 |

Compound Structure

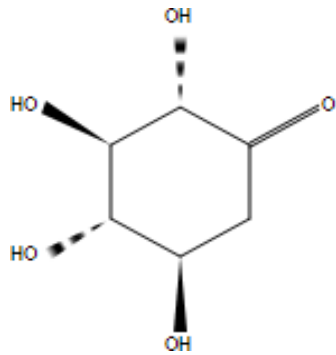

Qualitative Compound Report

23.Artemunoxanthentrione epoxide

| Compound Label                              | Name                             | m/z      | RT    | Algorithm  | Mass     |
|---------------------------------------------|----------------------------------|----------|-------|------------|----------|
| Cpd 11:<br>Artemunoxanthentrione<br>epoxide | Artemunoxanthentrione<br>epoxide | 461.1265 | 3.084 | Auto MS/MS | 462.1337 |

MS Spectrum

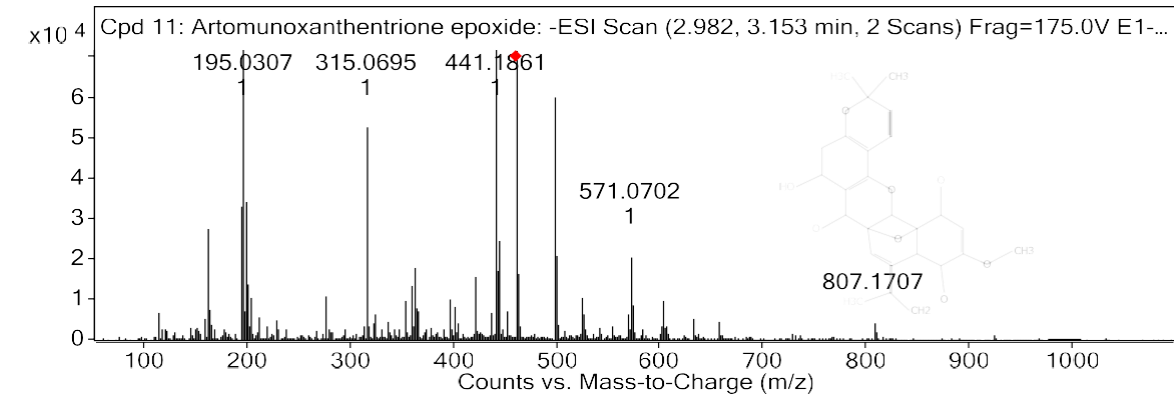

MS Zoomed Spectrum

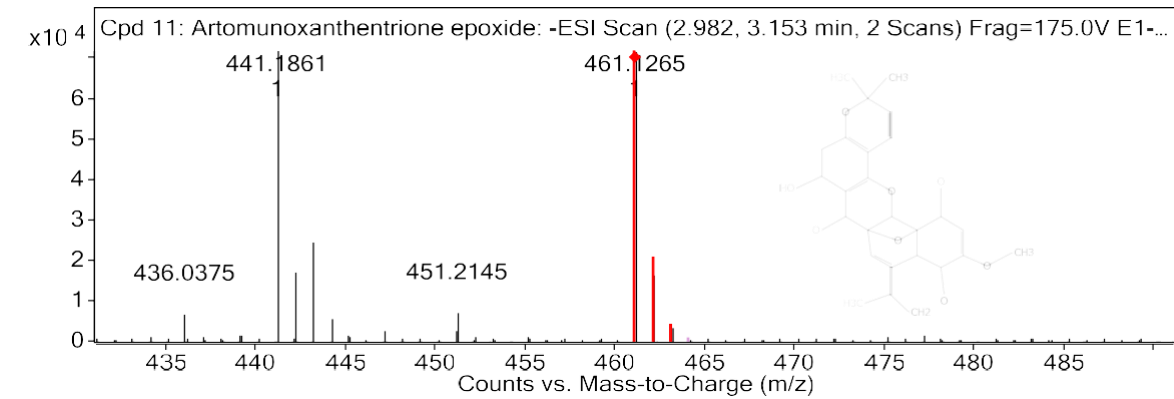

MS Spectrum Peak List

| m/z      | Calc m/z | Diff(ppm) | z | Abund    | Formula                                        | Ion                |
|----------|----------|-----------|---|----------|------------------------------------------------|--------------------|
| 161.0795 |          |           |   | 27804.68 |                                                |                    |
| 193.9928 |          |           | 1 | 33198.33 |                                                |                    |
| 195.0307 |          |           | 1 | 85880.09 |                                                |                    |
| 197.8056 |          |           |   | 34383.05 |                                                |                    |
| 315.0695 |          |           | 1 | 52939.7  |                                                |                    |
| 441.1861 |          |           | 1 | 77303.88 |                                                |                    |
| 461.1265 | 461.1242 | -5.11     | 1 | 71648.73 | C <sub>26</sub> H <sub>22</sub> O <sub>8</sub> | (M-H) <sup>-</sup> |
| 462.1294 | 462.1276 | -4        | 1 | 16556.97 | C <sub>26</sub> H <sub>22</sub> O <sub>8</sub> | (M-H) <sup>-</sup> |
| 463.132  | 463.1302 | -3.74     | 1 | 3725.32  | C <sub>26</sub> H <sub>22</sub> O <sub>8</sub> | (M-H) <sup>-</sup> |
| 497.1027 |          |           | 1 | 60200.13 |                                                |                    |

MSMS Spectrum

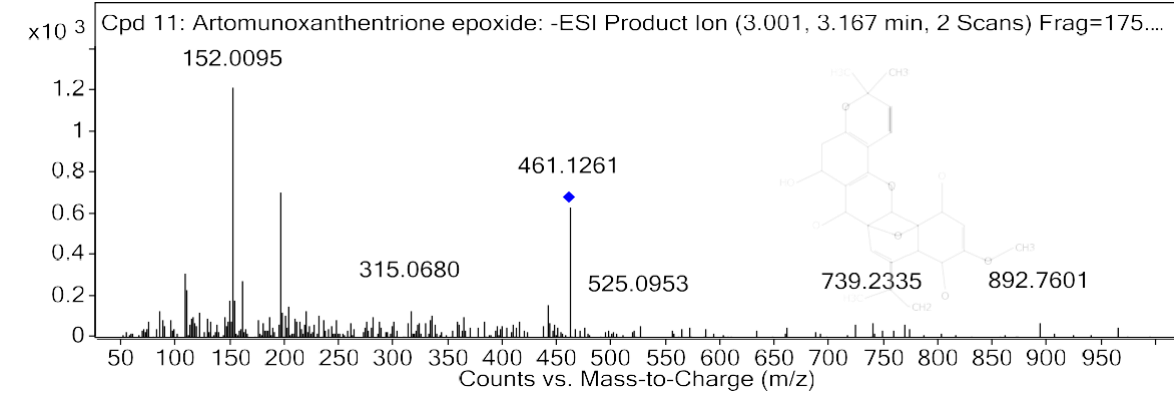

MS/MS Spectrum Peak List

| m/z      | z | Abund   |
|----------|---|---------|
| 108.02   |   | 312.27  |
| 109.0276 |   | 232.95  |
| 148.9893 |   | 181.53  |
| 152.0095 | 1 | 1216.47 |
| 153.0168 | 1 | 182.41  |
| 161.0785 |   | 275.94  |
| 195.0314 |   | 708.16  |
| 203.0803 |   | 152.62  |
| 441.1832 |   | 162.6   |
| 461.1261 |   | 634.62  |

Compound Structure

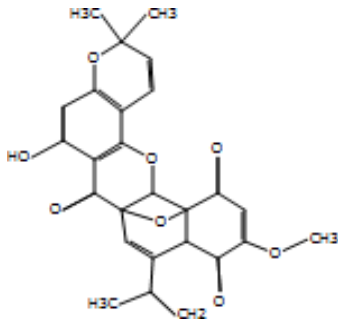

Qualitative Compound Report

24. Eletriptan

| Compound Label     | Name       | m/z     | RT    | Algorithm  | Mass     |
|--------------------|------------|---------|-------|------------|----------|
| Cpd 12: Eletriptan | Eletriptan | 441.186 | 3.307 | Auto MS/MS | 382.1715 |

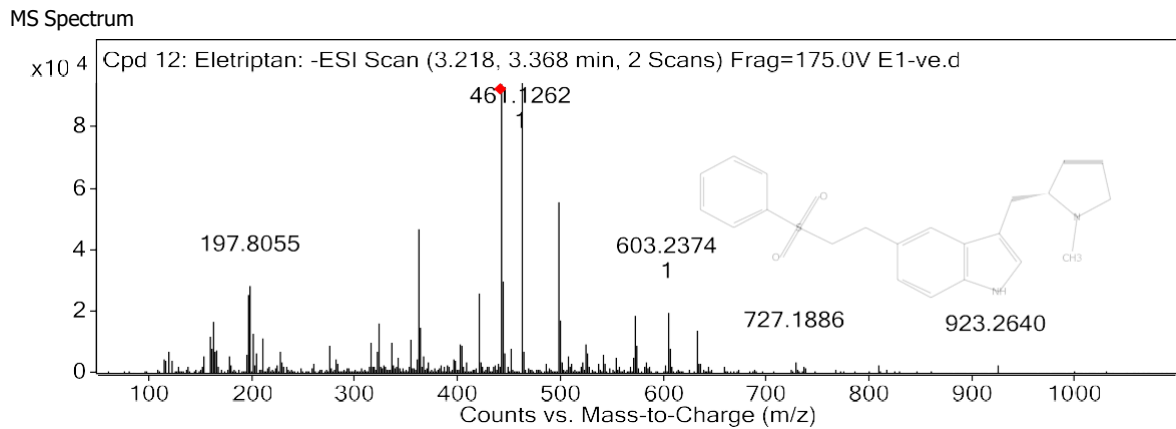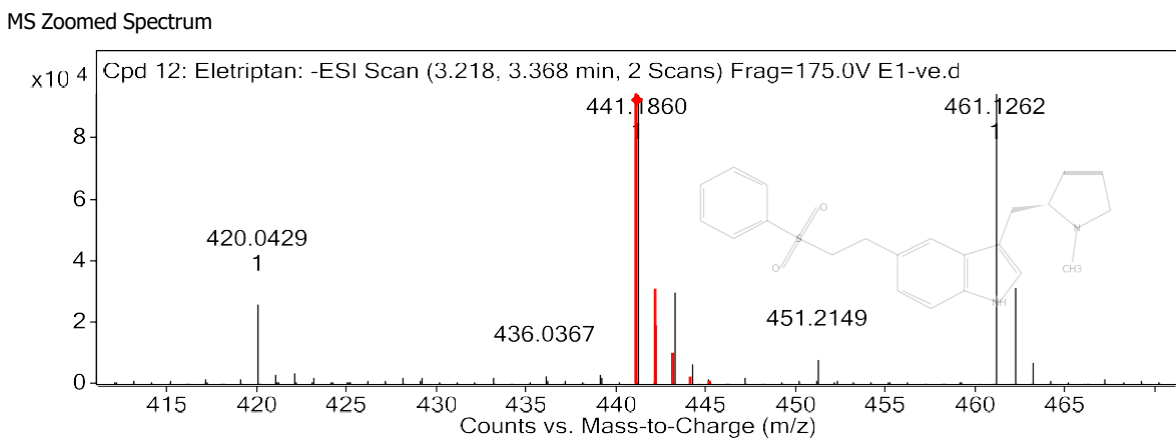

MS Spectrum Peak List

| m/z      | Calc m/z | Diff(ppm) | z | Abund     | Formula         | Ion         |
|----------|----------|-----------|---|-----------|-----------------|-------------|
| 197.8055 |          |           |   | 28861.24  |                 |             |
| 361.0664 |          |           | 1 | 46950.53  |                 |             |
| 441.186  | 441.1854 | -1.48     | 1 | 94318.3   | C22 H26 N2 O2 S | (M+CH3COO)- |
| 442.1893 | 442.1885 | -1.81     | 1 | 19301.6   | C22 H26 N2 O2 S | (M+CH3COO)- |
| 443.1842 | 443.1862 | 4.67      | 1 | 30365.72  | C22 H26 N2 O2 S | (M+CH3COO)- |
| 444.1862 | 444.1873 | 2.52      | 1 | 6751.78   | C22 H26 N2 O2 S | (M+CH3COO)- |
| 445.1878 | 445.1888 | 2.37      | 1 | 1541.24   | C22 H26 N2 O2 S | (M+CH3COO)- |
| 461.1262 |          |           | 1 | 147876.52 |                 |             |
| 462.1298 |          |           | 1 | 31671.24  |                 |             |
| 497.1029 |          |           | 1 | 56111.63  |                 |             |

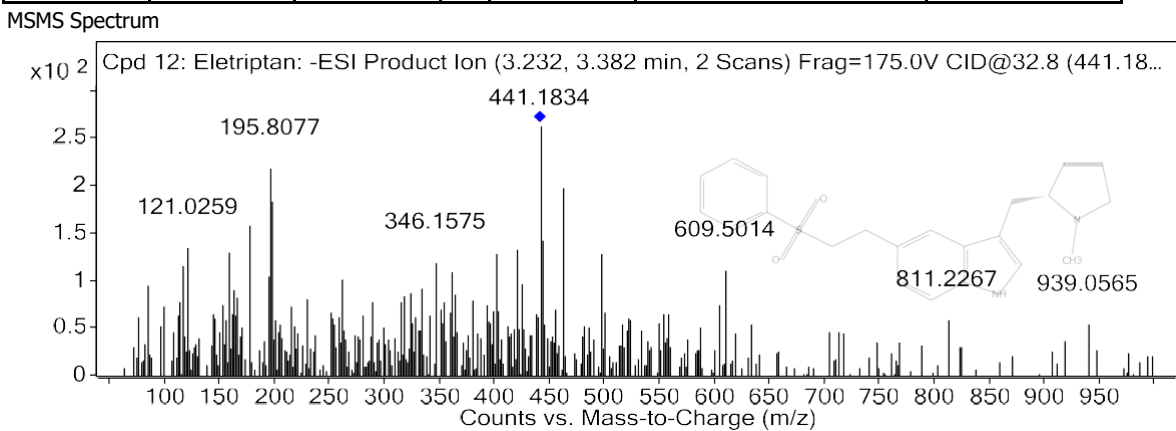

MS/MS Spectrum Peak List

| m/z      | z | Abund  |
|----------|---|--------|
| 121.0259 |   | 135.38 |
| 158.076  |   | 130.83 |
| 177.0182 |   | 159.63 |
| 195.8077 |   | 219.2  |
| 197.8064 |   | 185.07 |
| 420.0442 | 1 | 134.61 |
| 441.1834 | 1 | 263.74 |
| 442.1884 | 1 | 137.64 |
| 443.1732 | 1 | 142.77 |
| 461.1232 |   | 198.02 |

Compound Structure

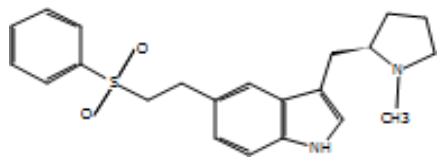

Qualitative Compound Report

25.Fraxidin

| Compound Label   | Name     | m/z      | RT    | Algorithm  | Mass     |
|------------------|----------|----------|-------|------------|----------|
| Cpd 14: Fraxidin | Fraxidin | 221.0463 | 3.883 | Auto MS/MS | 222.0532 |

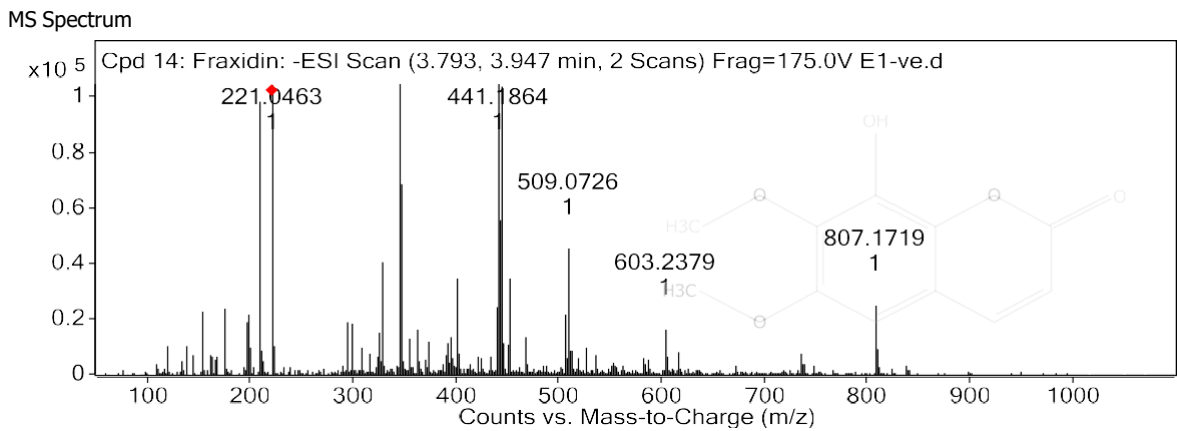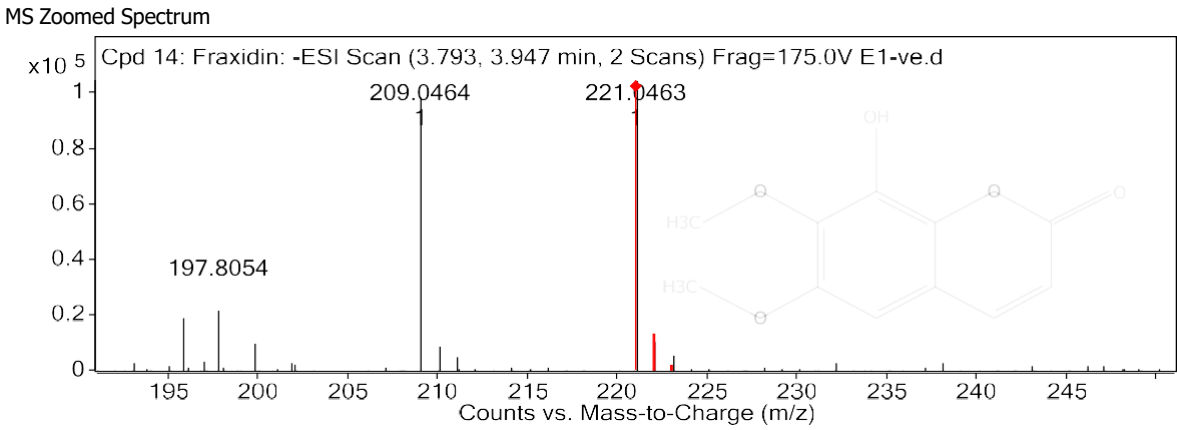

MS Spectrum Peak List

| m/z      | Calc m/z | Diff(ppm) | z | Abund     | Formula    | Ion    |
|----------|----------|-----------|---|-----------|------------|--------|
| 209.0464 |          |           | 1 | 98559.92  |            |        |
| 221.0463 | 221.0455 | -3.52     | 1 | 104564.13 | C11 H10 O5 | (M-H)- |
| 222.0497 | 222.0489 | -3.64     | 1 | 10962.22  | C11 H10 O5 | (M-H)- |
| 223.0433 | 223.0508 | 33.53     | 1 | 5891.25   | C11 H10 O5 | (M-H)- |
| 344.037  |          |           | 1 | 166517.48 |            |        |
| 346.034  |          |           | 1 | 68745.25  |            |        |
| 441.1864 |          |           | 1 | 262928.13 |            |        |
| 442.1891 |          |           | 1 | 56320.05  |            |        |
| 443.1849 |          |           | 1 | 104119.79 |            |        |
| 509.0726 |          |           | 1 | 45852.65  |            |        |

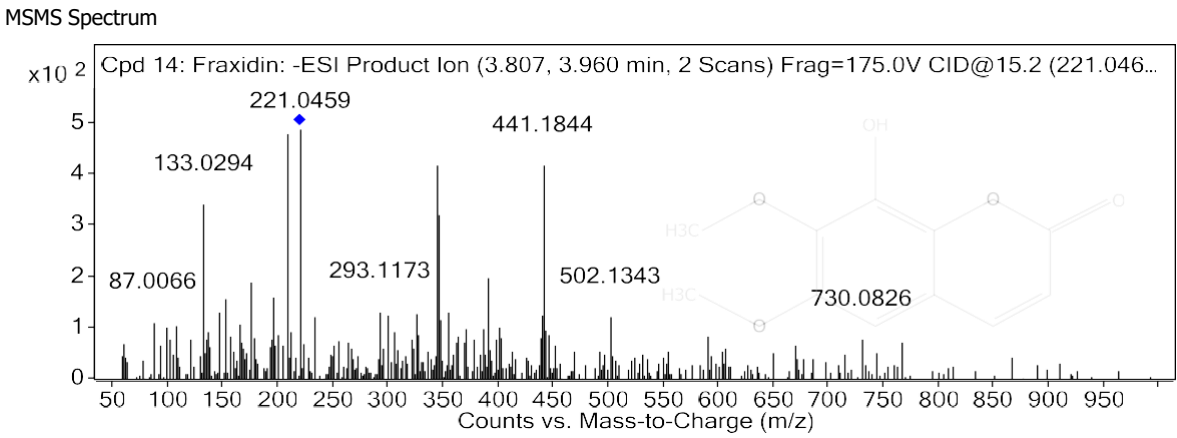

MS/MS Spectrum Peak List

| m/z      | z | Abund  |
|----------|---|--------|
| 133.0294 |   | 342.31 |
| 152.0104 |   | 156.6  |
| 175.0594 |   | 188.55 |
| 195.8017 |   | 161.11 |
| 209.0457 |   | 478.5  |
| 221.0459 |   | 488.97 |
| 344.0349 | 1 | 416.57 |
| 346.0275 | 1 | 320.72 |
| 391.0729 | 1 | 197.41 |
| 441.1844 | 1 | 418.13 |

Compound Structure

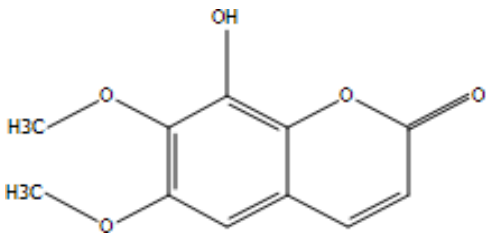

Qualitative Compound Report

26.N-(6-Oxo-6H-dibenzo[b,d]pyran-3- yl)maleamic acid

| Compound Label                                           | Name                                             | m/z      | RT    | Algorithm  | Mass    |
|----------------------------------------------------------|--------------------------------------------------|----------|-------|------------|---------|
| Cpd 17: N-(6-Oxo-6H-dibenzo[b,d]pyran-3-yl)maleamic acid | N-(6-Oxo-6H-dibenzo[b,d]pyran-3-yl)maleamic acid | 354.0659 | 4.262 | Auto MS/MS | 309.067 |

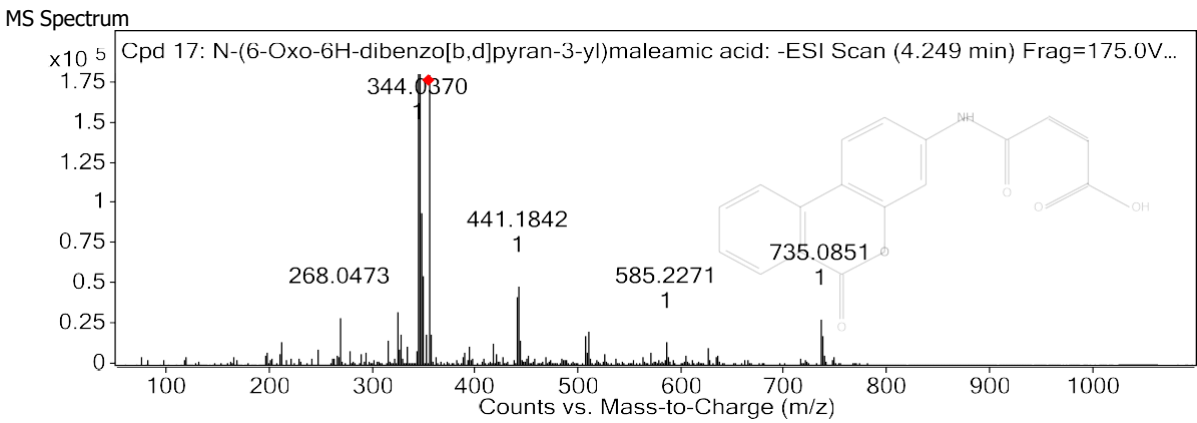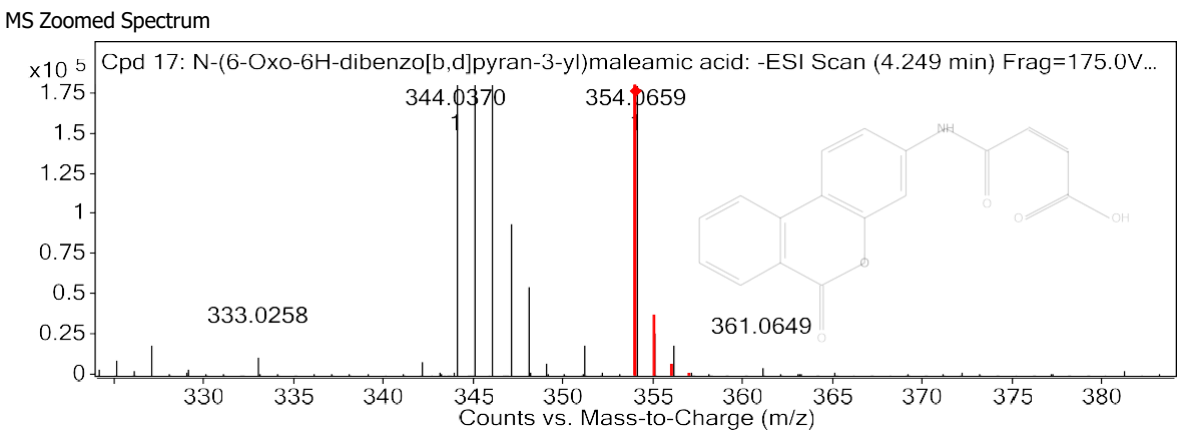

MS Spectrum Peak List

| m/z      | Calc m/z | Diff(ppm) | z | Abund      | Formula      | Ion       |
|----------|----------|-----------|---|------------|--------------|-----------|
| 344.037  |          |           | 1 | 1781311.25 |              |           |
| 345.0401 |          |           | 1 | 235815.33  |              |           |
| 346.0342 |          |           | 1 | 744729.81  |              |           |
| 347.037  |          |           | 1 | 95294.2    |              |           |
| 348.0315 |          |           | 1 | 56077.88   |              |           |
| 354.0659 | 354.0619 | -11.09    | 1 | 180457.14  | C17 H11 N O5 | (M+HCOO)- |
| 355.0691 | 355.0652 | -11.11    | 1 | 27037.23   | C17 H11 N O5 | (M+HCOO)- |
| 356.0636 | 356.0675 | 10.81     | 1 | 19933.35   | C17 H11 N O5 | (M+HCOO)- |
| 357.0728 | 357.0701 | -7.55     | 1 | 3110       | C17 H11 N O5 | (M+HCOO)- |
| 441.1842 |          |           | 1 | 49406      |              |           |

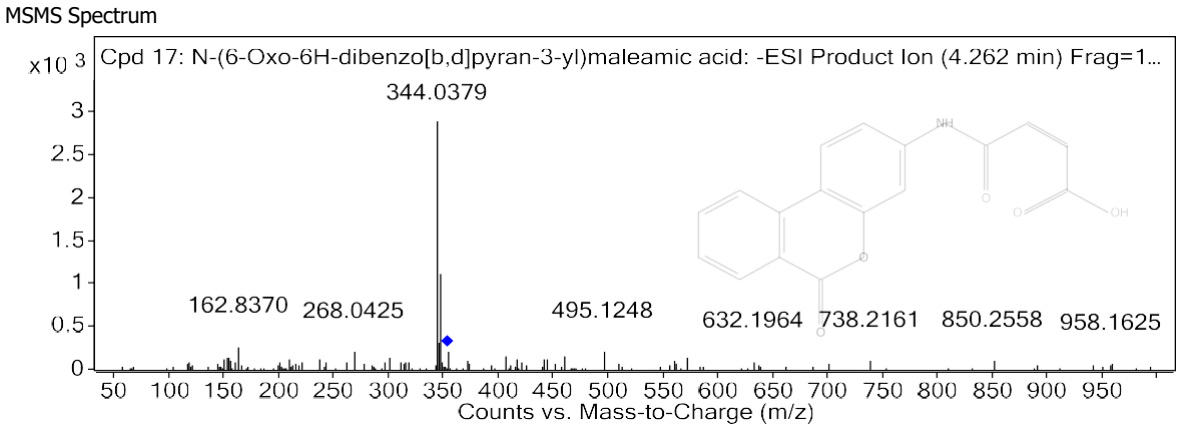

MS/MS Spectrum Peak List

| m/z      | z | Abund   |
|----------|---|---------|
| 162.837  |   | 282     |
| 268.0425 |   | 217.72  |
| 344.0379 | 1 | 2906.67 |
| 345.038  | 1 | 328.92  |
| 346.0337 | 1 | 1132.69 |
| 347.0355 | 1 | 223.25  |
| 354.0649 |   | 224.53  |
| 406.0283 |   | 170.22  |
| 460.1032 |   | 180.87  |
| 495.1248 |   | 221.7   |

Compound Structure

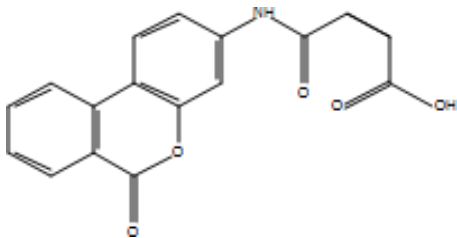



Qualitative Compound Report

27.Sciadopitysin

| Compound Label        | Name          | m/z      | RT    | Algorithm  | Mass     |
|-----------------------|---------------|----------|-------|------------|----------|
| Cpd 20: Sciadopitysin | Sciadopitysin | 625.1373 | 5.015 | Auto MS/MS | 580.1389 |

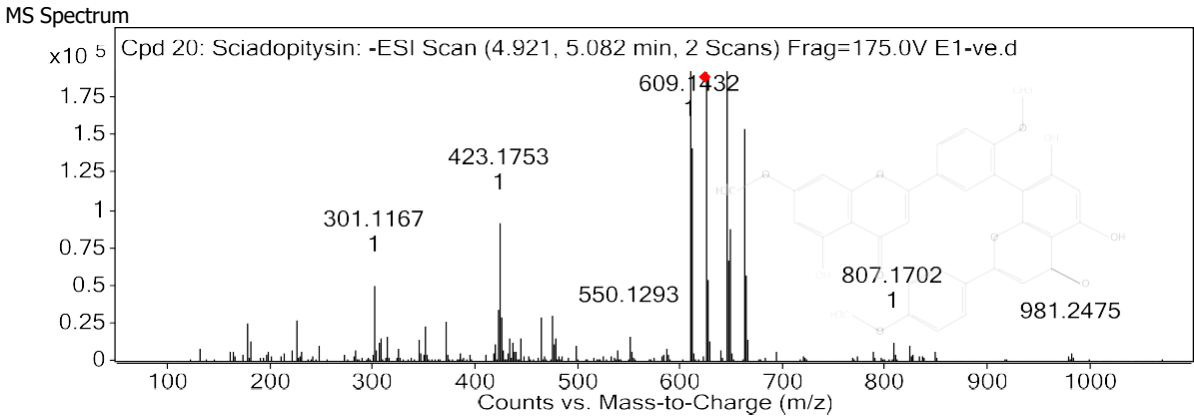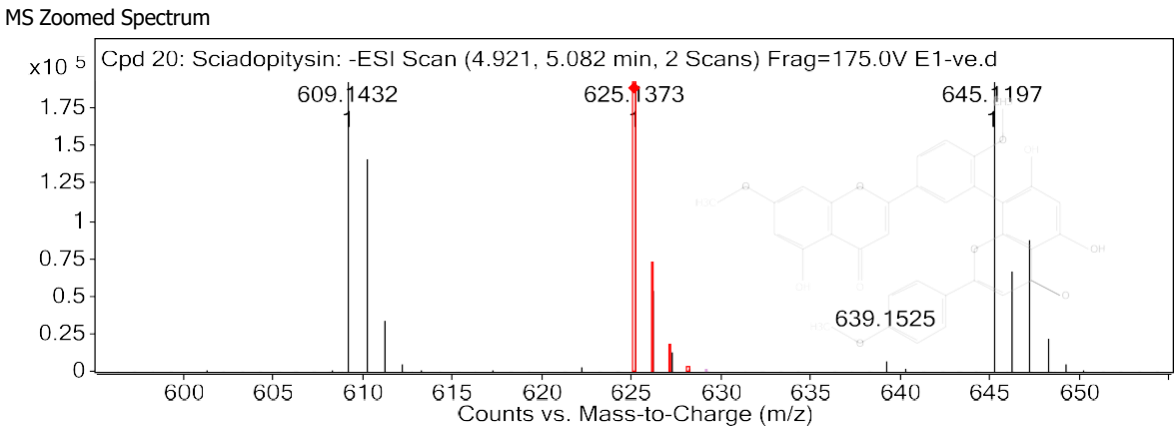

MS Spectrum Peak List

| m/z      | Calc m/z | Diff(ppm) | z | Abund     | Formula    | Ion       |
|----------|----------|-----------|---|-----------|------------|-----------|
| 423.1753 |          |           | 1 | 92355.78  |            |           |
| 609.1432 |          |           | 1 | 486394.09 |            |           |
| 610.1463 |          |           | 1 | 142020.11 |            |           |
| 625.1373 | 625.1351 | -3.4      | 1 | 193169.13 | 33 H24 O10 | (M+HCOO)- |
| 626.1401 | 626.1385 | -2.48     | 1 | 55206.25  | 33 H24 O10 | (M+HCOO)- |
| 627.1427 | 627.1413 | -2.38     | 1 | 13833.61  | 33 H24 O10 | (M+HCOO)- |
| 628.1441 | 628.144  | -0.19     | 1 | 3127.81   | 33 H24 O10 | (M+HCOO)- |
| 645.1197 |          |           | 1 | 239242.91 |            |           |
| 647.1179 |          |           | 1 | 88560.55  |            |           |
| 661.1137 |          |           | 1 | 155282.06 |            |           |

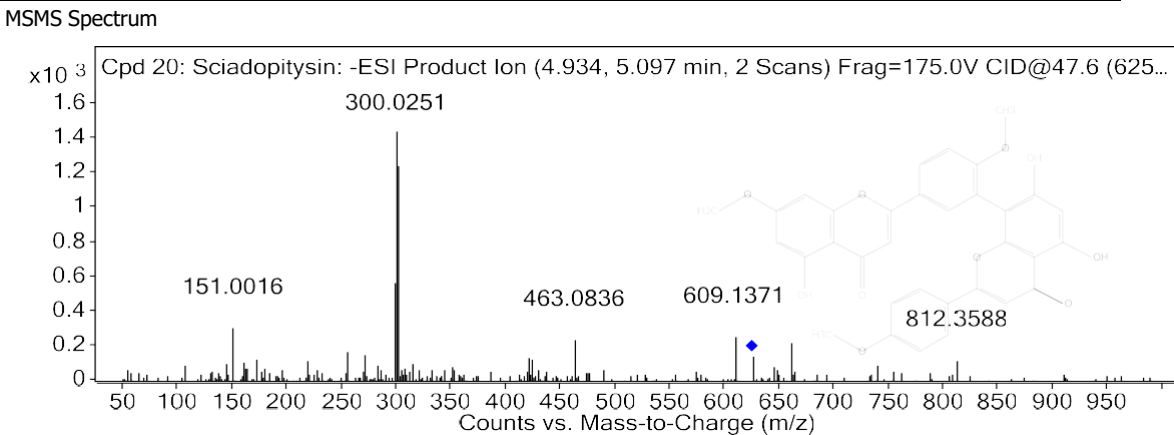

MS/MS Spectrum Peak List

| m/z      | z | Abund   |
|----------|---|---------|
| 151.0016 |   | 309.76  |
| 255.0261 |   | 168.84  |
| 271.0185 |   | 157.53  |
| 299.0162 |   | 569.87  |
| 300.0251 |   | 1447.18 |
| 301.0318 |   | 1248.88 |
| 463.0836 |   | 241.09  |
| 609.1371 |   | 258.41  |
| 625.1397 |   | 148.79  |
| 661.1134 | 1 | 227.33  |

Compound Structure

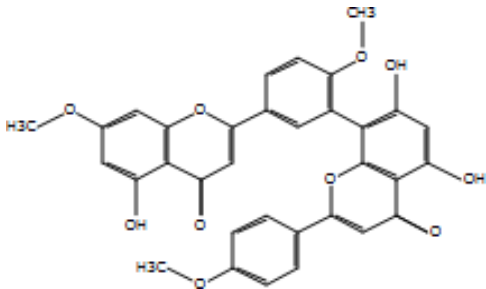

Qualitative Compound Report

28.Rutin

| Compound Label | Name  | m/z      | RT    | Algorithm  | Mass     |
|----------------|-------|----------|-------|------------|----------|
| Cpd 26: Rutin  | Rutin | 609.1434 | 5.308 | Auto MS/MS | 610.1505 |

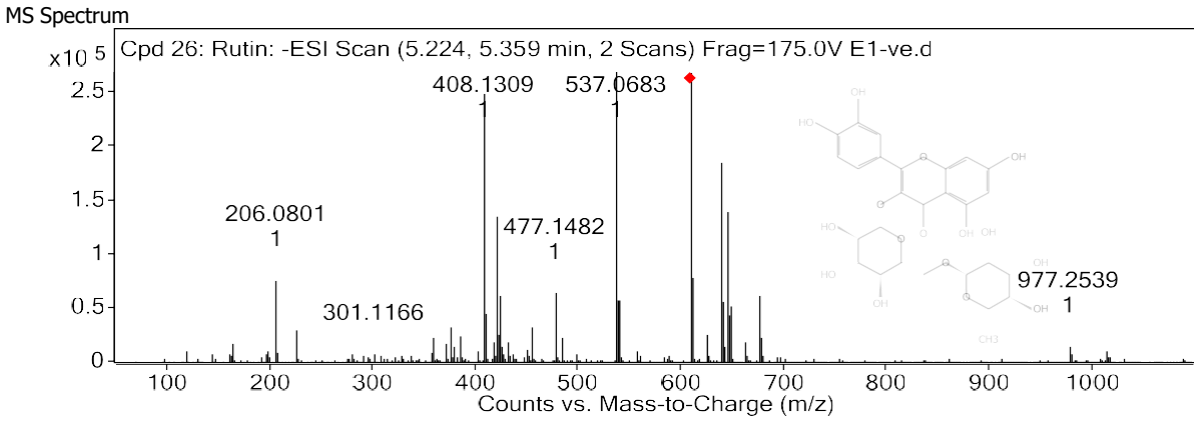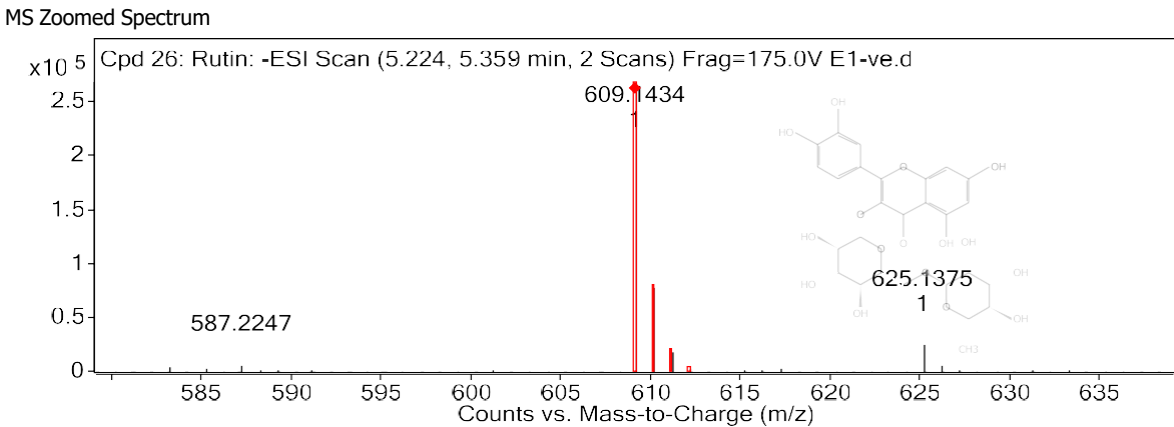

MS Spectrum Peak List

| m/z      | Calc m/z | Diff(ppm) | z | Abund     | Formula     | Ion    |
|----------|----------|-----------|---|-----------|-------------|--------|
| 206.0801 |          |           | 1 | 76599.42  |             |        |
| 408.1309 |          |           | 1 | 248513.59 |             |        |
| 421.1608 |          |           | 1 | 135882.22 |             |        |
| 537.0683 |          |           | 1 | 279047.63 |             |        |
| 609.1434 | 609.1461 | 4.38      | 1 | 268490.88 | C27 H30 O16 | (M-H)- |
| 610.1462 | 610.1495 | 5.42      | 1 | 79427.65  | C27 H30 O16 | (M-H)- |
| 611.1488 | 611.1518 | 4.98      | 1 | 19295.77  | C27 H30 O16 | (M-H)- |
| 612.1513 | 612.1545 | 5.26      | 1 | 3986.23   | C27 H30 O16 | (M-H)- |
| 639.1538 |          |           | 1 | 185015.75 |             |        |
| 645.1196 |          |           | 1 | 139684.78 |             |        |

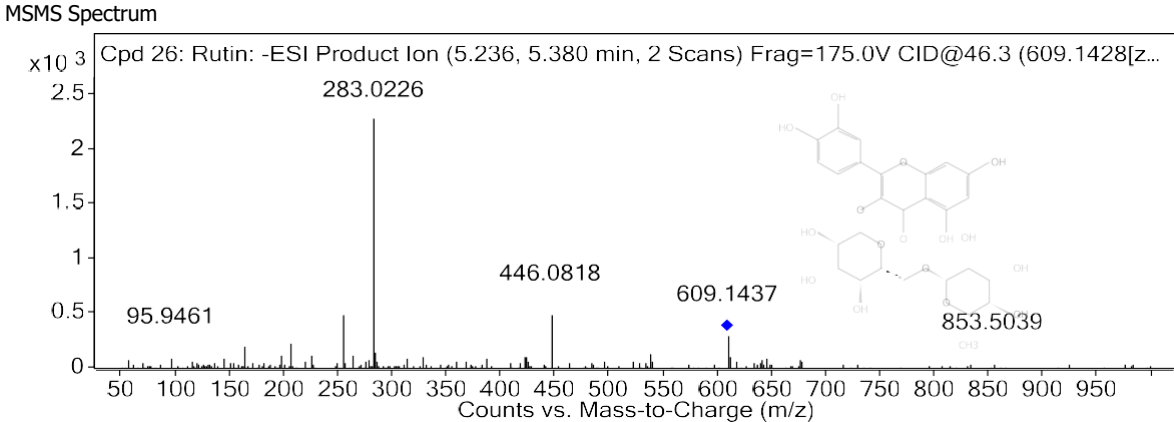

MS/MS Spectrum Peak List

| m/z      | z | Abund  |
|----------|---|--------|
| 164.0698 |   | 199.96 |
| 206.0783 |   | 227.37 |
| 255.028  |   | 496.6  |
| 283.0226 | 1 | 2288.8 |
| 284.0336 | 1 | 150.92 |
| 446.0818 | 1 | 495.49 |
| 447.0906 | 1 | 257.93 |
| 537.0607 |   | 143.72 |
| 538.0663 | 1 | 141.99 |
| 609.1437 | 1 | 304.63 |

Compound Structure

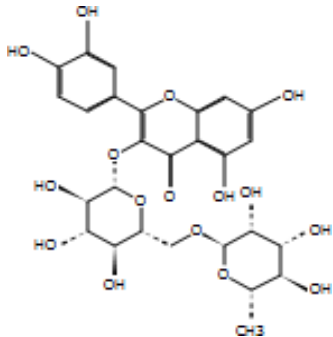

Qualitative Compound Report

29.5'- Butyrylphosphoinosine

| Compound Label                   | Name                     | m/z      | RT    | Algorithm  | Mass     |
|----------------------------------|--------------------------|----------|-------|------------|----------|
| Cpd 29: 5'-Butyrylphosphoinosine | 5'-Butyrylphosphoinosine | 463.0856 | 5.735 | Auto MS/MS | 418.0875 |

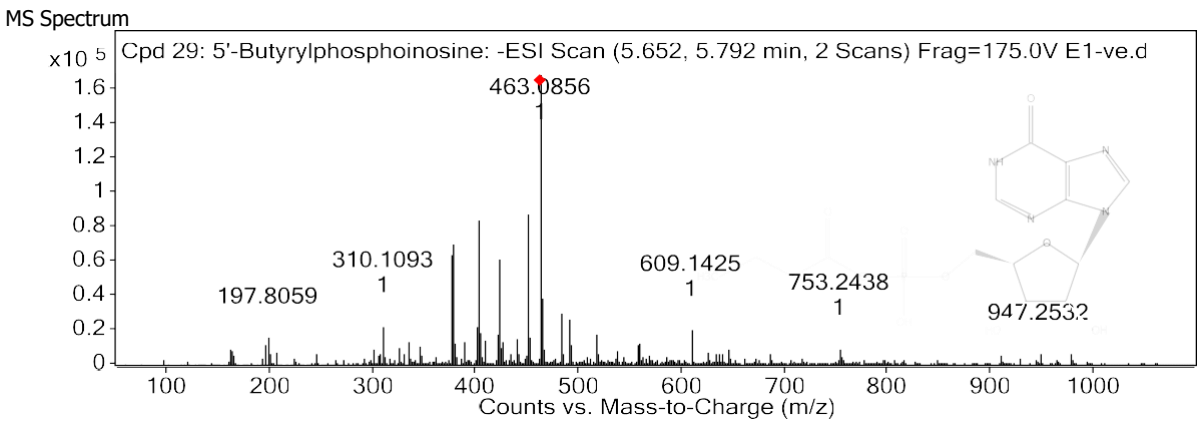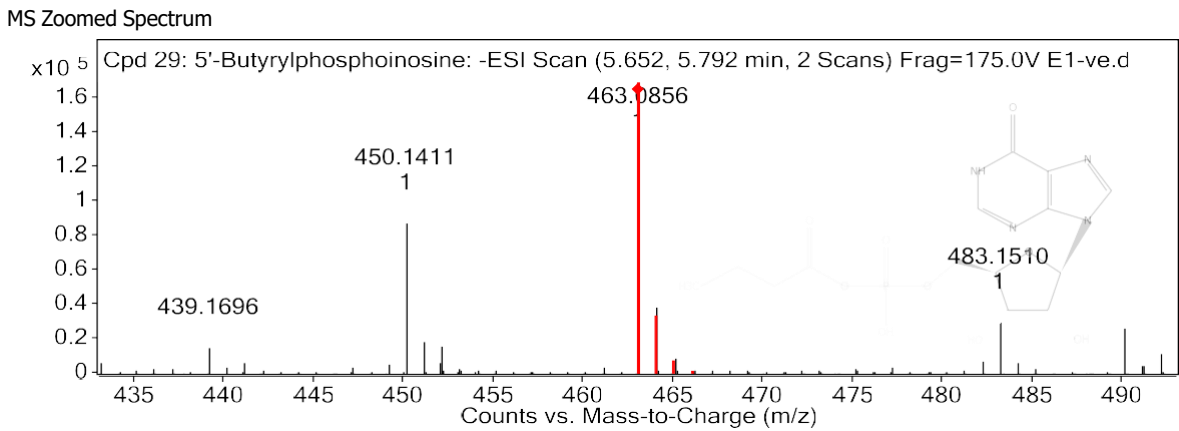

MS Spectrum Peak List

| m/z      | Calc m/z | Diff(ppm) | z | Abund     | Formula         | Ion       |
|----------|----------|-----------|---|-----------|-----------------|-----------|
| 376.0093 |          |           | 1 | 64272.88  |                 |           |
| 378.12   |          |           | 1 | 70394.77  |                 |           |
| 403.1947 |          |           | 1 | 83906.95  |                 |           |
| 422.1468 |          |           |   | 61528.07  |                 |           |
| 423.1726 |          |           | 1 | 43029.25  |                 |           |
| 450.1411 |          |           | 1 | 87592.06  |                 |           |
| 463.0856 | 463.0872 | 3.49      | 1 | 168353.58 | C14 H19 N4 O9 P | (M+HCOO)- |
| 464.0886 | 464.0901 | 3.11      | 1 | 39317.38  | C14 H19 N4 O9 P | (M+HCOO)- |
| 465.0922 | 465.092  | -0.26     | 1 | 9575.1    | C14 H19 N4 O9 P | (M+HCOO)- |
| 466.0949 | 466.0946 | -0.59     | 1 | 1821.6    | C14 H19 N4 O9 P | (M+HCOO)- |

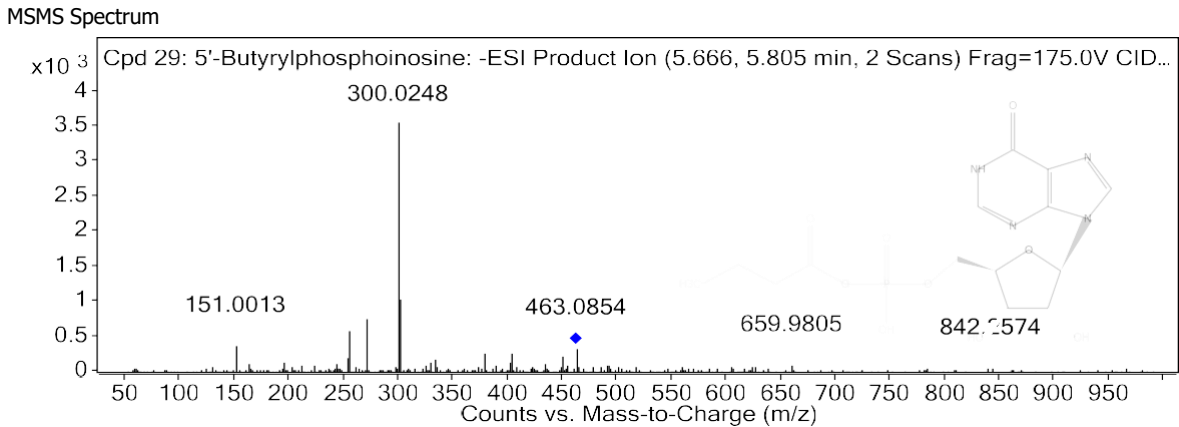

MS/MS Spectrum Peak List

| m/z      | z | Abund   |
|----------|---|---------|
| 151.0013 |   | 378.1   |
| 254.0195 |   | 222.73  |
| 255.0273 |   | 595.43  |
| 271.0222 |   | 777.47  |
| 300.0248 | 1 | 3567.98 |
| 301.0327 | 1 | 1040.34 |
| 378.1209 |   | 282.03  |
| 403.1903 |   | 281.69  |
| 450.1428 |   | 233.27  |
| 463.0854 | 1 | 344.45  |

Compound Structure

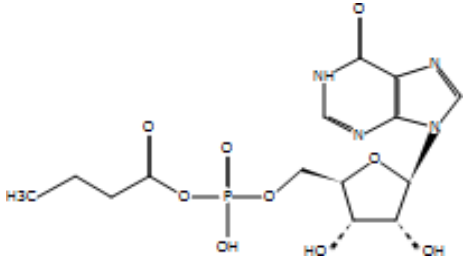

Qualitative Compound Report

30.Evoxine

| Compound Label  | Name    | m/z     | RT   | Algorithm  | Mass     |
|-----------------|---------|---------|------|------------|----------|
| Cpd 30: Evoxine | Evoxine | 392.136 | 6.06 | Auto MS/MS | 347.1374 |

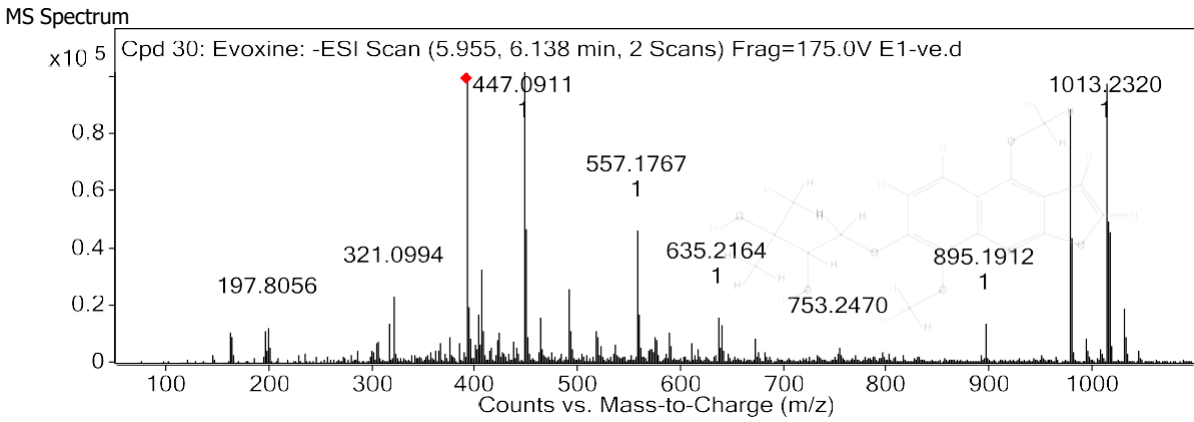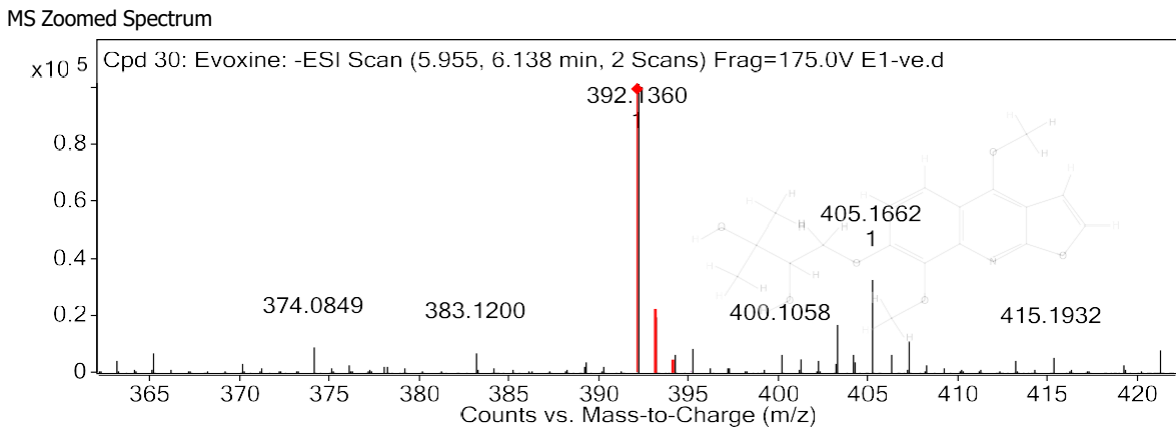

MS Spectrum Peak List

| m/z       | Calc m/z | Diff(ppm) | z | Abund     | Formula      | Ion       |
|-----------|----------|-----------|---|-----------|--------------|-----------|
| 392.136   | 392.1351 | -2.21     | 1 | 101463.36 | C18 H21 N O6 | (M+HCOO)- |
| 393.1389  | 393.1384 | -1.33     | 1 | 19816.52  | C18 H21 N O6 | (M+HCOO)- |
| 394.1353  | 394.1407 | 13.57     | 1 | 7022.82   | C18 H21 N O6 | (M+HCOO)- |
| 447.0911  |          |           | 1 | 219811.3  |              |           |
| 448.0939  |          |           | 1 | 47106.62  |              |           |
| 557.1767  |          |           | 1 | 46527.59  |              |           |
| 977.2553  |          |           | 1 | 88657.95  |              |           |
| 1013.232  |          |           | 1 | 97728.96  |              |           |
| 1014.2352 |          |           | 1 | 49645.54  |              |           |
| 1015.2325 |          |           | 1 | 45817.61  |              |           |

MSMS Spectrum

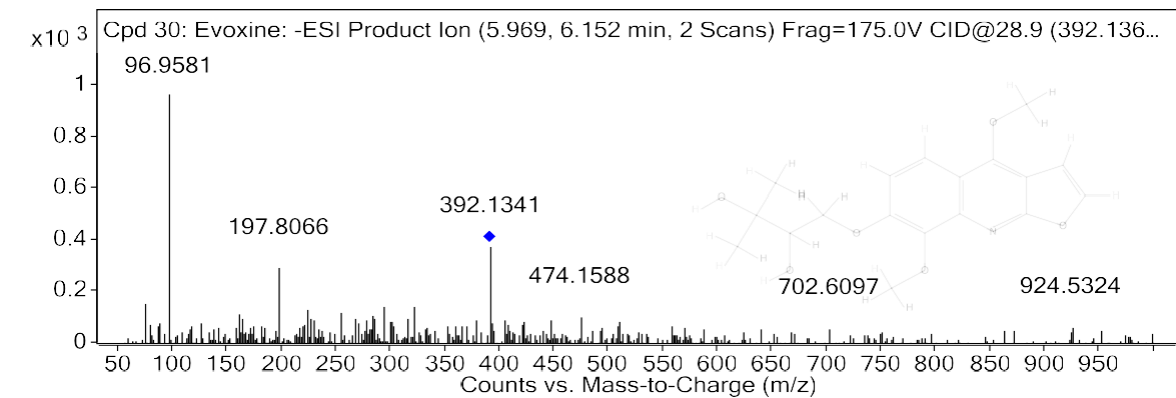

MS/MS Spectrum Peak List

| m/z      | z | Abund  |
|----------|---|--------|
| 74.9898  |   | 156.87 |
| 96.9581  |   | 969.11 |
| 160.8396 |   | 116.05 |
| 197.8066 |   | 293.88 |
| 224.5282 |   | 131.94 |
| 255.0275 |   | 122.36 |
| 284.032  |   | 108.49 |
| 294.1638 |   | 146.54 |
| 321.1004 | 1 | 145.15 |
| 392.1341 | 1 | 378.49 |

Compound Structure

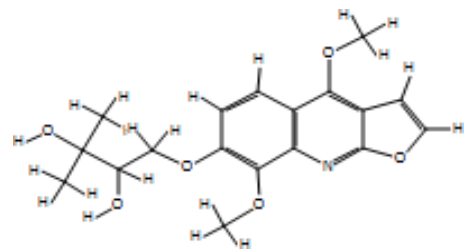

Qualitative Compound Report

31.Kaempferol 3-O-β-D- galactoside

| Compound Label                         | Name                           | m/z      | RT    | Algorithm  | Mass     |
|----------------------------------------|--------------------------------|----------|-------|------------|----------|
| Cpd 32: Kaempferol 3-O-β-D-galactoside | Kaempferol 3-O-β-D-galactoside | 447.0911 | 6.223 | Auto MS/MS | 448.0983 |

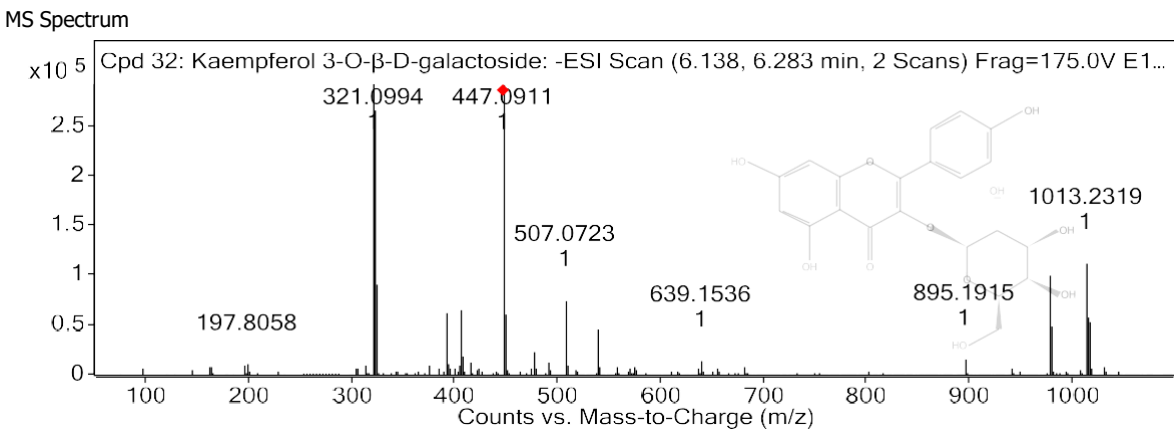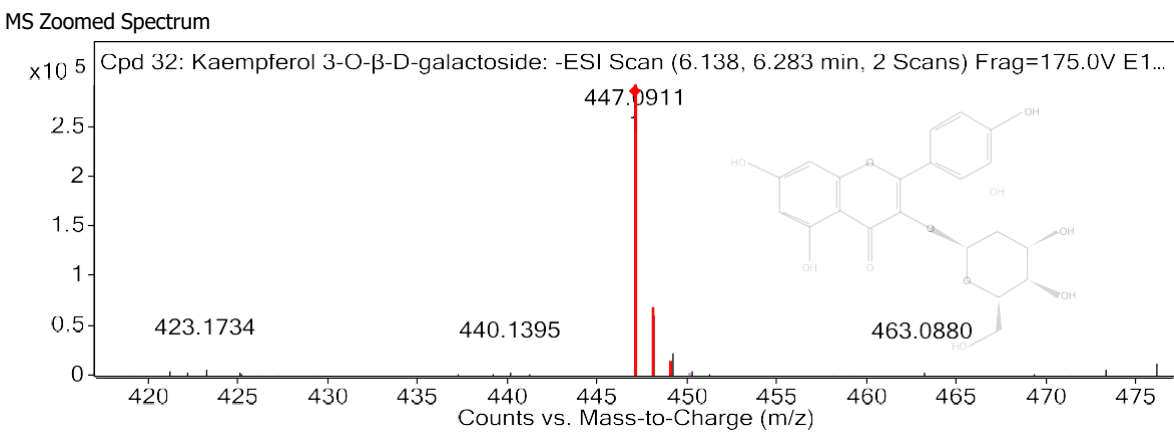

MS Spectrum Peak List

| m/z       | Calc m/z | Diff(ppm) | z | Abund      | Formula     | Ion    |
|-----------|----------|-----------|---|------------|-------------|--------|
| 321.0994  |          |           | 1 | 1882519.75 |             |        |
| 322.1026  |          |           | 1 | 266648.13  |             |        |
| 323.0991  |          |           | 1 | 91824.42   |             |        |
| 405.166   |          |           | 1 | 65941.68   |             |        |
| 447.0911  | 447.0933 | 4.99      | 1 | 291528.31  | C21 H20 O11 | (M-H)- |
| 448.094   | 448.0967 | 5.98      | 1 | 61303.89   | C21 H20 O11 | (M-H)- |
| 449.0972  | 449.0989 | 3.79      | 1 | 13844.99   | C21 H20 O11 | (M-H)- |
| 507.0723  |          |           | 1 | 75828.09   |             |        |
| 977.2552  |          |           | 1 | 100538.7   |             |        |
| 1013.2319 |          |           | 1 | 112976.65  |             |        |

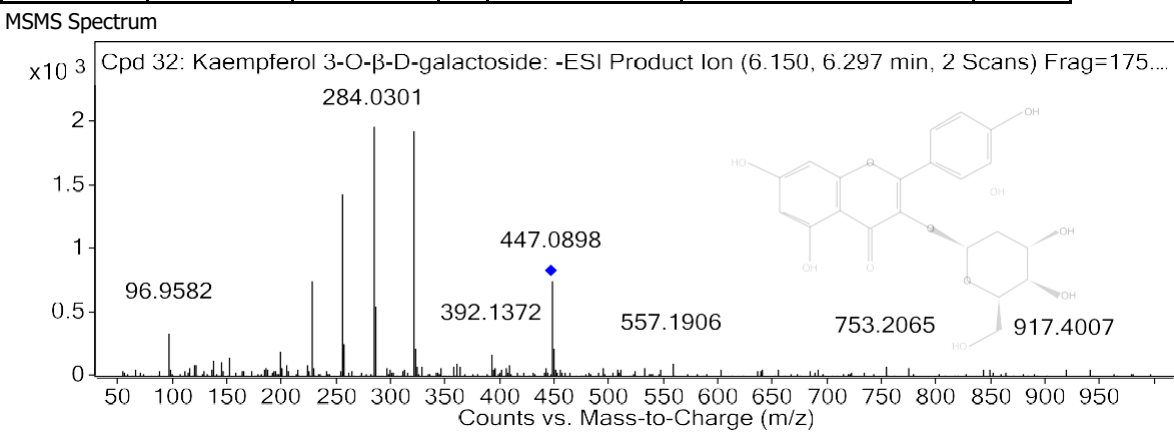

MS/MS Spectrum Peak List

| m/z      | z | Abund   |
|----------|---|---------|
| 96.9582  |   | 346.66  |
| 227.0317 | 1 | 760.01  |
| 255.0277 | 1 | 1443.03 |
| 256.0335 | 1 | 255.09  |
| 284.0301 | 1 | 1972.1  |
| 285.0373 | 1 | 555.45  |
| 321.0999 | 1 | 1938.76 |
| 322.1017 | 1 | 224.67  |
| 447.0898 | 1 | 750.25  |
| 448.0952 | 1 | 222.12  |

Compound Structure

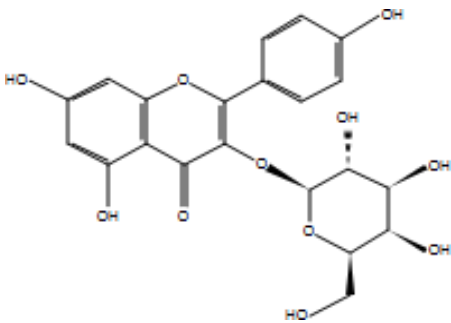

Qualitative Compound Report

32.Lactucin

| Compound Label   | Name     | m/z      | RT    | Algorithm  | Mass     |
|------------------|----------|----------|-------|------------|----------|
| Cpd 33: Lactucin | Lactucin | 321.0994 | 6.227 | Auto MS/MS | 276.1009 |

MS Spectrum

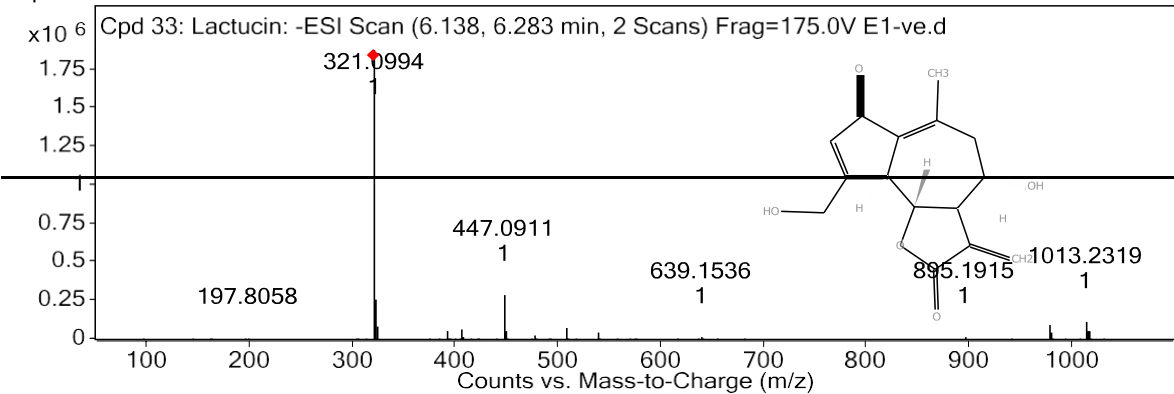

MS Zoomed Spectrum

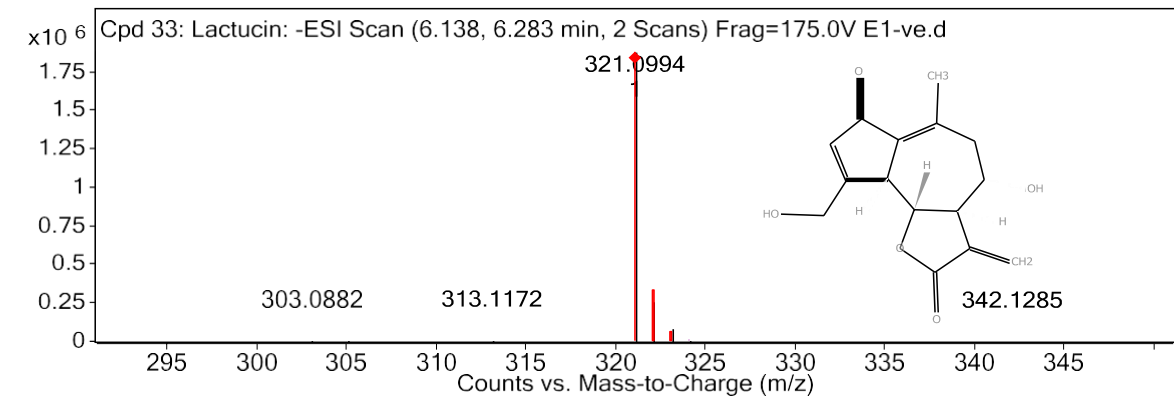

MS Spectrum Peak List

| m/z       | Calc m/z | Diff(ppm) | z | Abund      | Formula    | Ion       |
|-----------|----------|-----------|---|------------|------------|-----------|
| 321.0994  | 321.098  | -4.43     | 1 | 1882519.75 | C15 H16 O5 | (M+HCOO)- |
| 322.1026  | 322.1014 | -3.74     | 1 | 266648.13  | C15 H16 O5 | (M+HCOO)- |
| 323.0991  | 323.1035 | 13.7      | 1 | 91824.42   | C15 H16 O5 | (M+HCOO)- |
| 392.1361  |          |           | 1 | 62885      |            |           |
| 405.166   |          |           | 1 | 65941.68   |            |           |
| 447.0911  |          |           | 1 | 291528.31  |            |           |
| 448.094   |          |           | 1 | 61303.89   |            |           |
| 507.0723  |          |           | 1 | 75828.09   |            |           |
| 977.2552  |          |           | 1 | 100538.7   |            |           |
| 1013.2319 |          |           | 1 | 112976.65  |            |           |

MSMS Spectrum

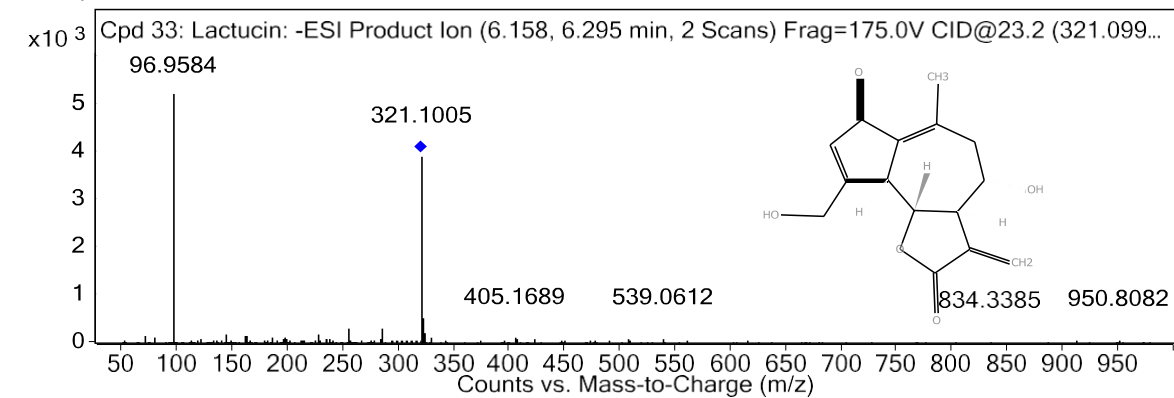

MS/MS Spectrum Peak List

| m/z      | z | Abund   |
|----------|---|---------|
| 96.9584  |   | 5236.34 |
| 144.0427 |   | 172.77  |
| 160.8387 |   | 166.52  |
| 162.8373 |   | 170.82  |
| 227.0327 |   | 203.13  |
| 255.029  |   | 316.17  |
| 284.0279 | 1 | 317.38  |
| 321.1005 | 1 | 3926.51 |
| 322.1052 | 1 | 538.88  |
| 323.0989 | 1 | 225.77  |

Compound Structure

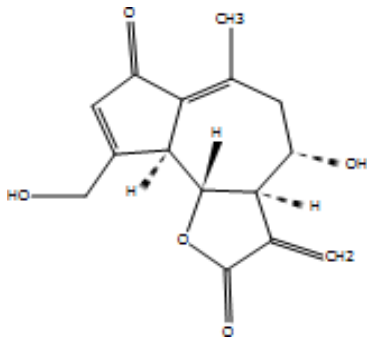



Qualitative Compound Report

33.1,4-Dimethoxyglucobrassic

| Compound Label                      | Name                      | m/z      | RT    | Algorithm  | Mass     |
|-------------------------------------|---------------------------|----------|-------|------------|----------|
| Cpd 34: 1,4-Dimethoxyglucobrassicin | 1,4-Dimethoxyglucobrassic | 507.0722 | 6.294 | Auto MS/MS | 508.0794 |

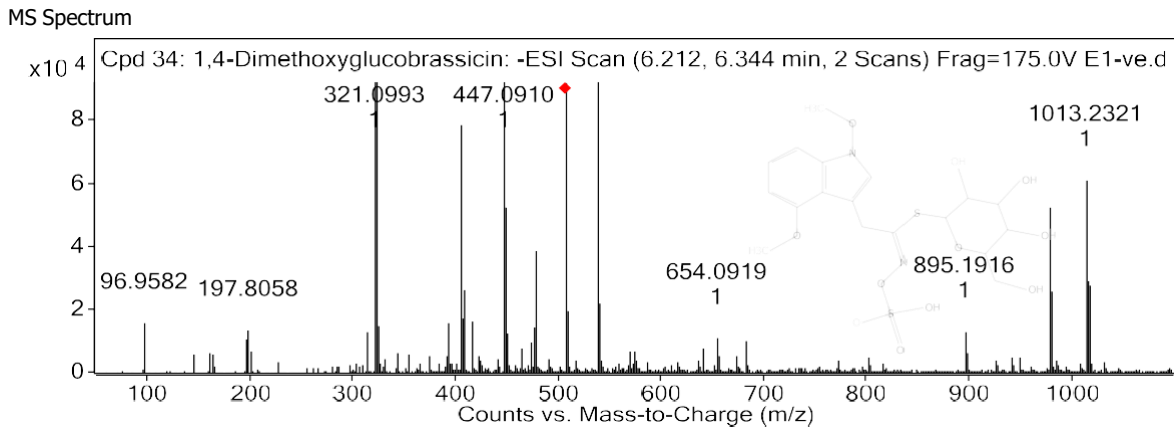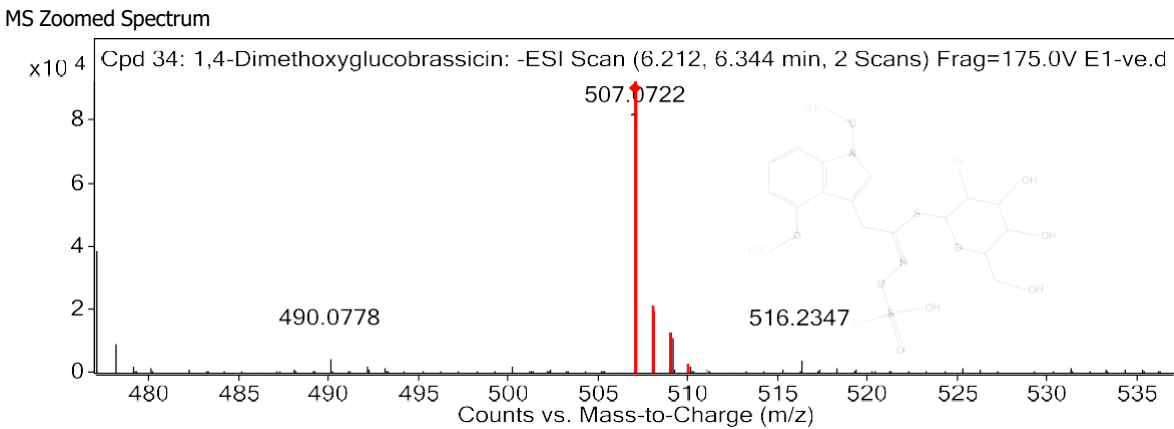

MS Spectrum Peak List

| m/z      | Calc m/z | Diff(ppm) | z | Abund      | Formula           | Ion    |
|----------|----------|-----------|---|------------|-------------------|--------|
| 321.0993 |          |           | 1 | 2257272.25 |                   |        |
| 322.1026 |          |           | 1 | 321526.75  |                   |        |
| 323.0988 |          |           | 1 | 113126.81  |                   |        |
| 405.1662 |          |           | 1 | 78841.05   |                   |        |
| 447.091  |          |           | 1 | 250790.5   |                   |        |
| 507.0722 | 507.0749 | 5.28      | 1 | 92027.79   | C18 H24 N2 O11 S2 | (M-H)- |
| 508.0749 | 508.0778 | 5.66      | 1 | 19701.67   | C18 H24 N2 O11 S2 | (M-H)- |
| 509.0706 | 509.0738 | 6.38      | 1 | 11522.62   | C18 H24 N2 O11 S2 | (M-H)- |
| 510.0757 | 510.076  | 0.58      | 1 | 2465.38    | C18 H24 N2 O11 S2 | (M-H)- |
| 538.0525 |          |           | 1 | 113979.89  |                   |        |

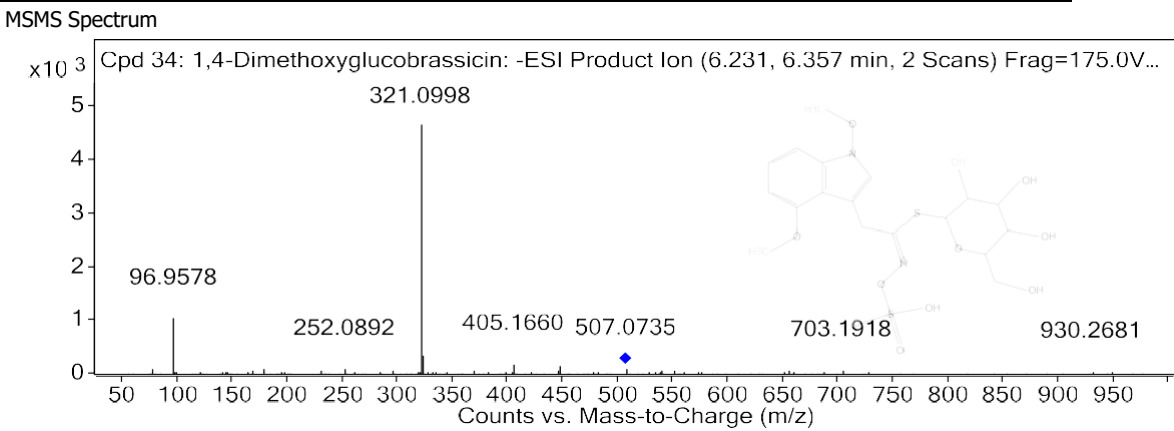

MS/MS Spectrum Peak List

| m/z      | z | Abund   |
|----------|---|---------|
| 77.3809  |   | 108.91  |
| 95.9501  |   | 600.26  |
| 96.9578  |   | 1050.12 |
| 179.1062 |   | 105.29  |
| 252.0892 |   | 102.34  |
| 321.0998 | 1 | 4678.56 |
| 322.1041 | 1 | 653.3   |
| 323.1    | 1 | 362.08  |
| 405.166  |   | 188.41  |
| 447.0866 |   | 162.26  |

Compound Structure

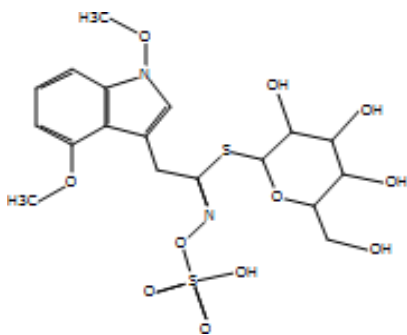

Qualitative Compound Report

34.Pubesenolide

| Compound Label       | Name         | m/z      | RT    | Algorithm  | Mass     |
|----------------------|--------------|----------|-------|------------|----------|
| Cpd 39: Pubesenolide | Pubesenolide | 457.2891 | 7.746 | Auto MS/MS | 458.2963 |

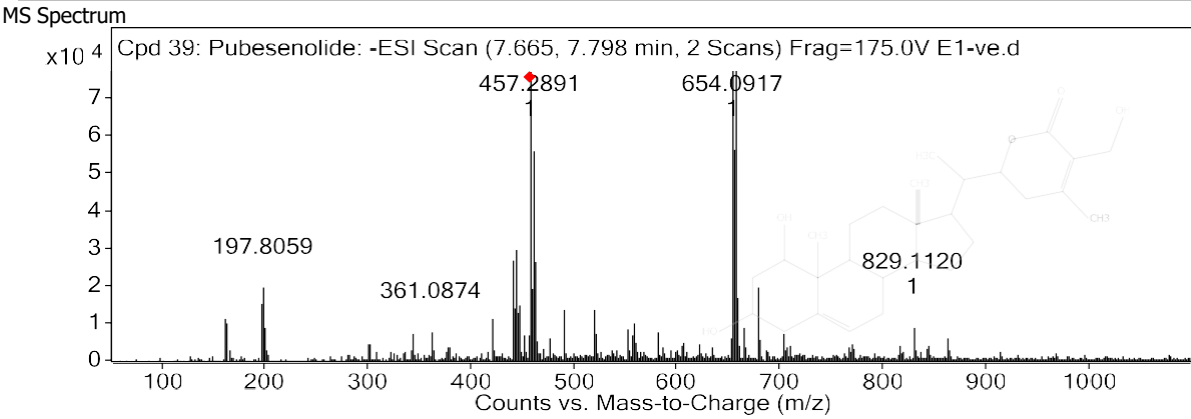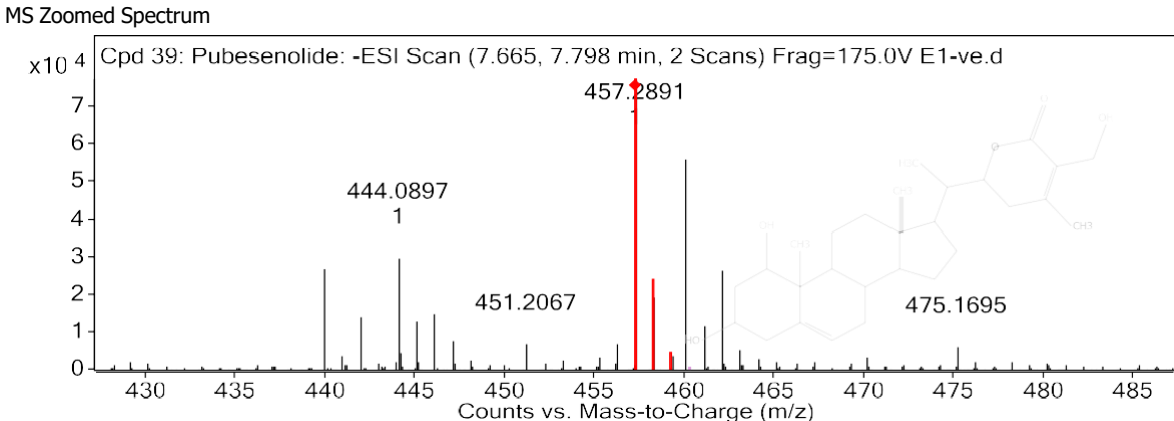

MS Spectrum Peak List

| m/z      | Calc m/z | Diff(ppm) | z | Abund     | Formula    | Ion    |
|----------|----------|-----------|---|-----------|------------|--------|
| 439.9531 |          |           | 1 | 27004.87  |            |        |
| 444.0897 |          |           | 1 | 30044.89  |            |        |
| 457.2891 | 457.2959 | 14.99     | 1 | 77217.66  | C28 H42 O5 | [M-H]- |
| 458.2922 | 458.2994 | 15.51     | 1 | 19364.13  | C28 H42 O5 | [M-H]- |
| 459.294  | 459.3023 | 18.07     | 1 | 4062.35   | C28 H42 O5 | [M-H]- |
| 460.0667 |          |           | 1 | 56242.33  |            |        |
| 654.0917 |          |           | 1 | 201302.98 |            |        |
| 655.0941 |          |           | 1 | 56405.41  |            |        |
| 656.0887 |          |           | 1 | 105396.64 |            |        |
| 657.0912 |          |           | 1 | 27850.63  |            |        |

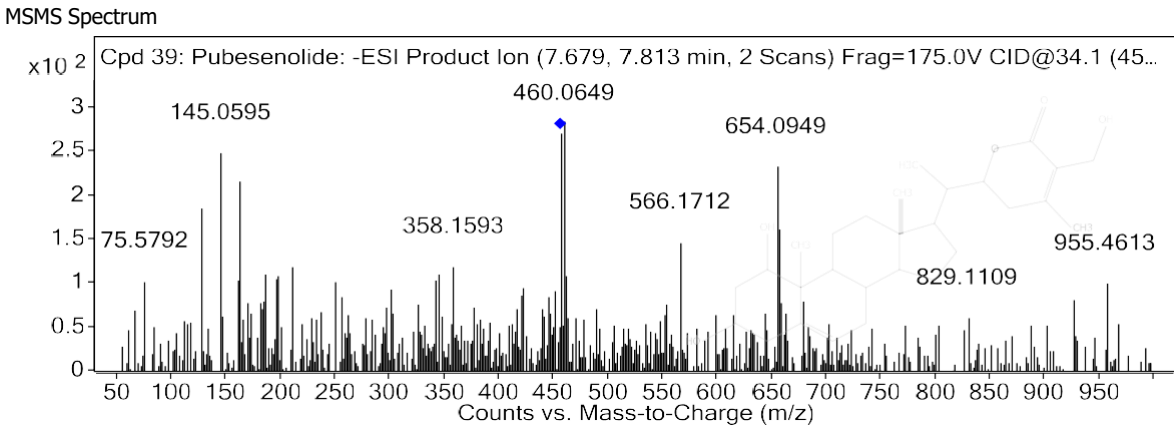

MS/MS Spectrum Peak List

| m/z      | z | Abund  |
|----------|---|--------|
| 127.0483 |   | 186.17 |
| 145.0595 |   | 249.04 |
| 162.8371 |   | 216.61 |
| 210.1452 |   | 119.41 |
| 358.1593 |   | 119.31 |
| 457.2847 | 1 | 270.86 |
| 460.0649 | 1 | 285.55 |
| 566.1712 |   | 147.09 |
| 654.0949 | 1 | 233.24 |
| 656.0862 | 1 | 162.44 |

Compound Structure

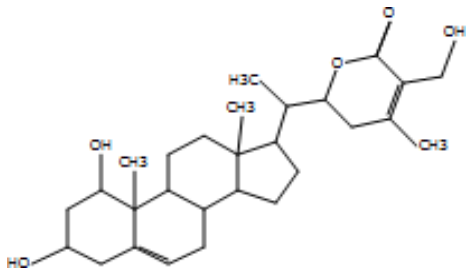



Qualitative Compound Report

35. Corchorifatty acid F

| Compound Label               | Name                 | m/z      | RT    | Algorithm  | Mass     |
|------------------------------|----------------------|----------|-------|------------|----------|
| Cpd 43: Corchorifatty acid F | Corchorifatty acid F | 327.2156 | 8.681 | Auto MS/MS | 328.2228 |

MS Spectrum

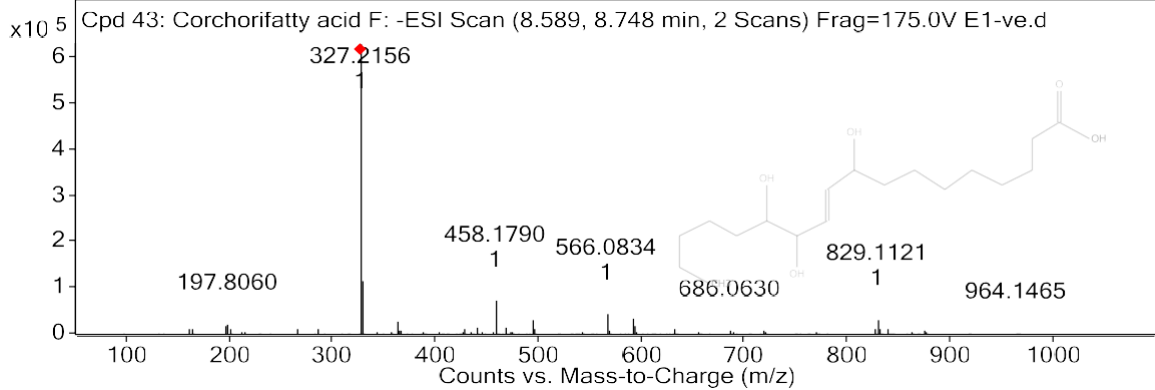

MS Zoomed Spectrum

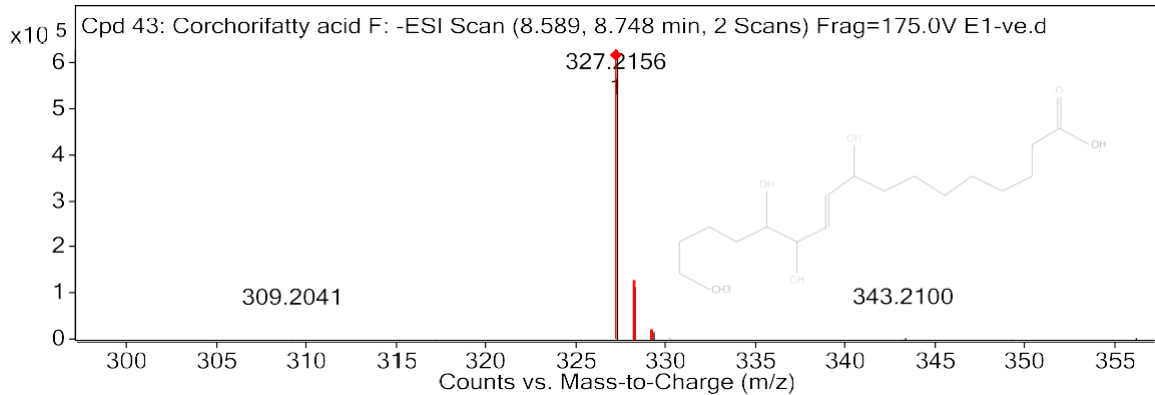

MS Spectrum Peak List

| m/z      | Calc m/z | Diff(ppm) | z | Abund     | Formula    | Ion    |
|----------|----------|-----------|---|-----------|------------|--------|
| 197.806  |          |           |   | 23814.24  |            |        |
| 327.2156 | 327.2177 | 6.44      | 1 | 630405.63 | C18 H32 O5 | (M-H)- |
| 328.2187 | 328.2211 | 7.31      | 1 | 116777.13 | C18 H32 O5 | (M-H)- |
| 329.2216 | 329.2236 | 6.01      | 1 | 17882.08  | C18 H32 O5 | (M-H)- |
| 363.1915 |          |           | 1 | 28585.45  |            |        |
| 458.179  |          |           | 1 | 73321.3   |            |        |
| 494.1557 |          |           | 1 | 33016.05  |            |        |
| 566.0834 |          |           | 1 | 45214.27  |            |        |
| 591.1071 |          |           | 1 | 36168.6   |            |        |
| 829.1121 |          |           | 1 | 33373.48  |            |        |

MSMS Spectrum

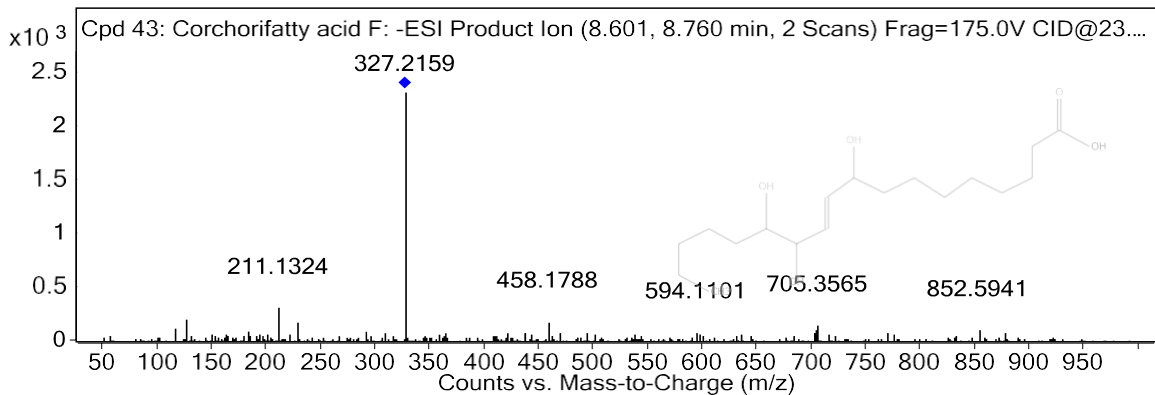

MS/MS Spectrum Peak List

| m/z      | z | Abund   |
|----------|---|---------|
| 116.9971 |   | 127.83  |
| 127.11   |   | 210.31  |
| 211.1324 |   | 314.35  |
| 229.1424 |   | 177.11  |
| 327.2159 | 1 | 2318.47 |
| 328.2213 | 1 | 335.09  |
| 458.1788 | 1 | 186.95  |
| 703.367  |   | 105.01  |
| 705.3565 |   | 152.11  |
| 852.5941 |   | 106.85  |

Compound Structure

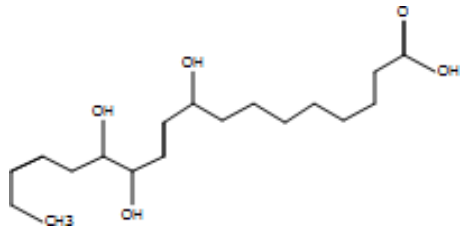

Qualitative Compound Report

36.Linifolin A

| Compound Label      | Name        | m/z      | RT    | Algorithm  | Mass     |
|---------------------|-------------|----------|-------|------------|----------|
| Cpd 45: Linifolin A | Linifolin A | 349.1304 | 8.903 | Auto MS/MS | 304.1319 |

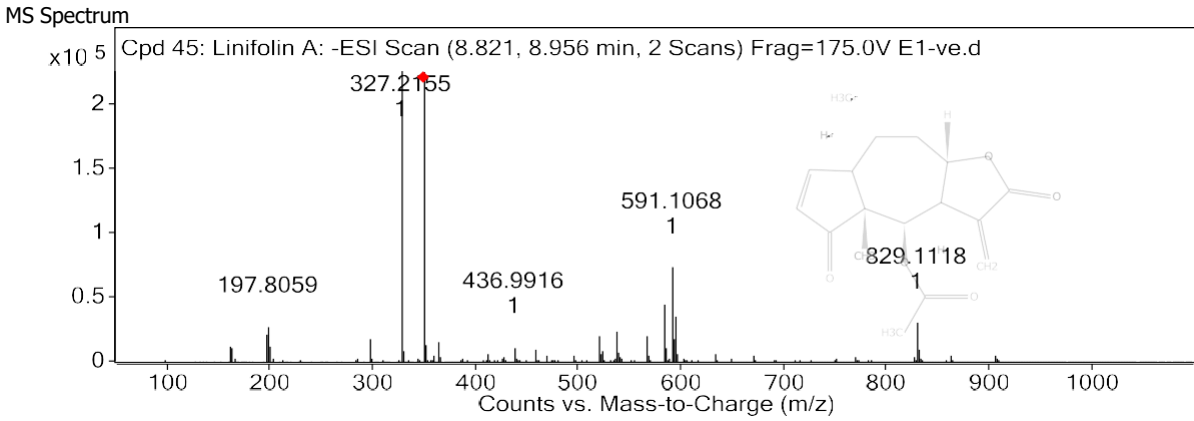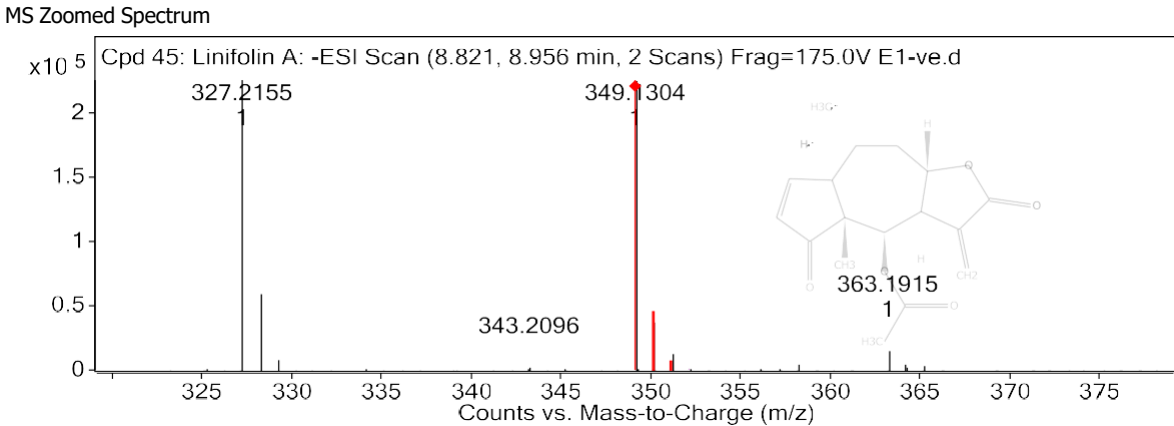

MS Spectrum Peak List

| m/z      | Calc m/z | Diff(ppm) | z | Abund     | Formula    | Ion       |
|----------|----------|-----------|---|-----------|------------|-----------|
| 197.8059 |          |           |   | 28012.05  |            |           |
| 327.2155 |          |           | 1 | 325771.69 |            |           |
| 328.2187 |          |           | 1 | 60871.77  |            |           |
| 349.1304 | 349.1293 | -3.23     | 1 | 225070.3  | C17 H20 O5 | (M+HCOO)- |
| 350.1335 | 350.1327 | -2.24     | 1 | 37789.12  | C17 H20 O5 | (M+HCOO)- |
| 351.13   | 351.135  | 14.21     | 1 | 13449.76  | C17 H20 O5 | (M+HCOO)- |
| 583.0012 |          |           | 1 | 45268.63  |            |           |
| 591.1068 |          |           | 1 | 73719.38  |            |           |
| 593.1041 |          |           | 1 | 36442.61  |            |           |
| 829.1118 |          |           | 1 | 30840.67  |            |           |

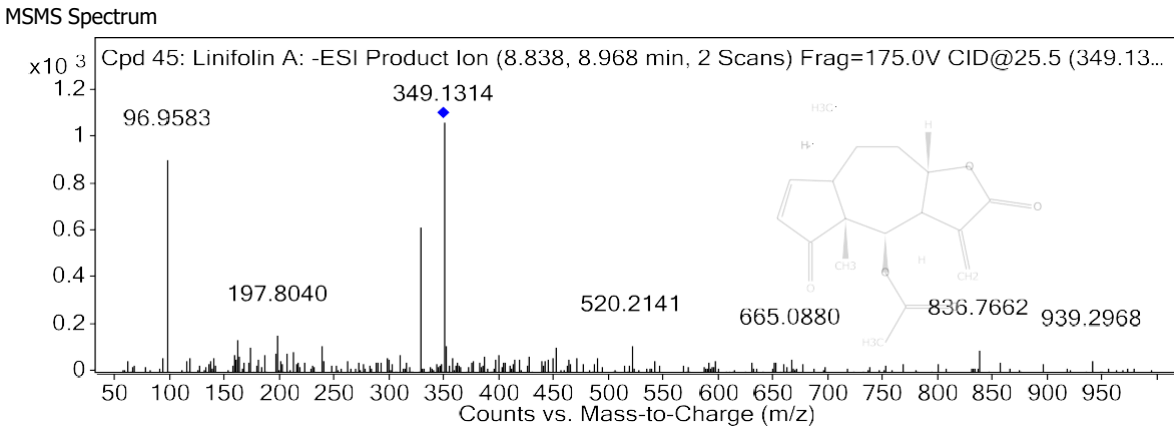

MS/MS Spectrum Peak List

| m/z      | z | Abund   |
|----------|---|---------|
| 96.9583  |   | 909.84  |
| 160.8381 |   | 138.43  |
| 197.804  |   | 159.27  |
| 237.9687 |   | 112.48  |
| 327.2156 | 1 | 618.75  |
| 328.214  | 1 | 219.61  |
| 349.1314 | 1 | 1067.71 |
| 350.1331 | 1 | 117.36  |
| 450.1935 |   | 110.06  |
| 520.2141 |   | 116.12  |

Compound Structure

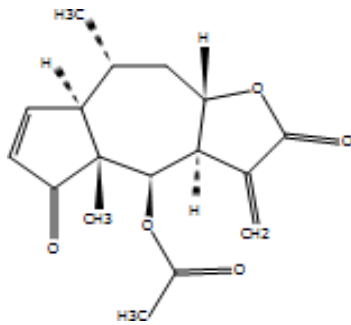

Qualitative Compound Report

37.N2-(2-Carboxymethyl- 2-hydroxysuccinoyl)arginine

| Compound Label                                          | Name                                            | m/z      | RT     | Algorithm  | Mass     |
|---------------------------------------------------------|-------------------------------------------------|----------|--------|------------|----------|
| Cpd 52: N2-(2-Carboxymethyl-2-hydroxysuccinoyl)arginine | N2-(2-Carboxymethyl-2-hydroxysuccinoyl)arginine | 393.1286 | 10.612 | Auto MS/MS | 348.1297 |

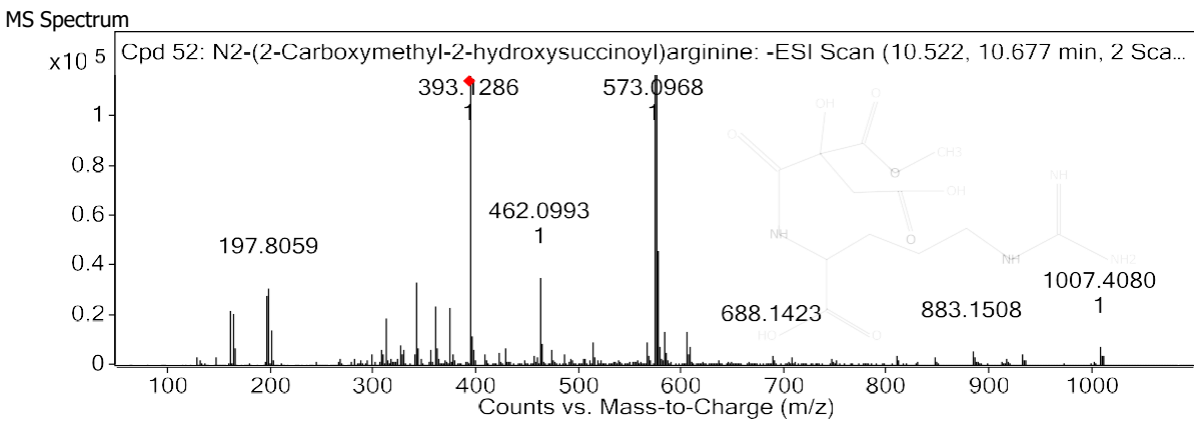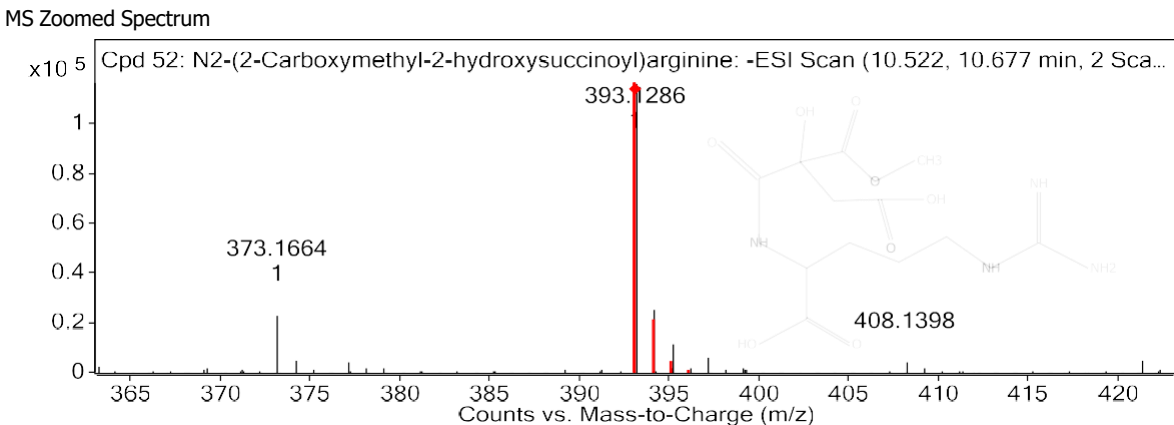

MS Spectrum Peak List

| m/z      | Calc m/z | Diff(ppm) | z | Abund     | Formula       | Ion       |
|----------|----------|-----------|---|-----------|---------------|-----------|
| 341.1944 |          |           | 1 | 33673.26  |               |           |
| 393.1286 | 393.1263 | -5.76     | 1 | 116310.91 | C12 H20 N4 O8 | (M+HCOO)- |
| 394.1315 | 394.1292 | -5.95     | 1 | 26075.67  | C12 H20 N4 O8 | (M+HCOO)- |
| 395.1269 | 395.1311 | 10.57     | 1 | 12260.87  | C12 H20 N4 O8 | (M+HCOO)- |
| 396.1274 | 396.1336 | 15.61     | 1 | 2636.49   | C12 H20 N4 O8 | (M+HCOO)- |
| 462.0993 |          |           | 1 | 35513.1   |               |           |
| 573.0968 |          |           | 1 | 368510.19 |               |           |
| 574.0994 |          |           | 1 | 98120.02  |               |           |
| 575.0938 |          |           | 1 | 188124    |               |           |
| 576.0958 |          |           | 1 | 46116.3   |               |           |

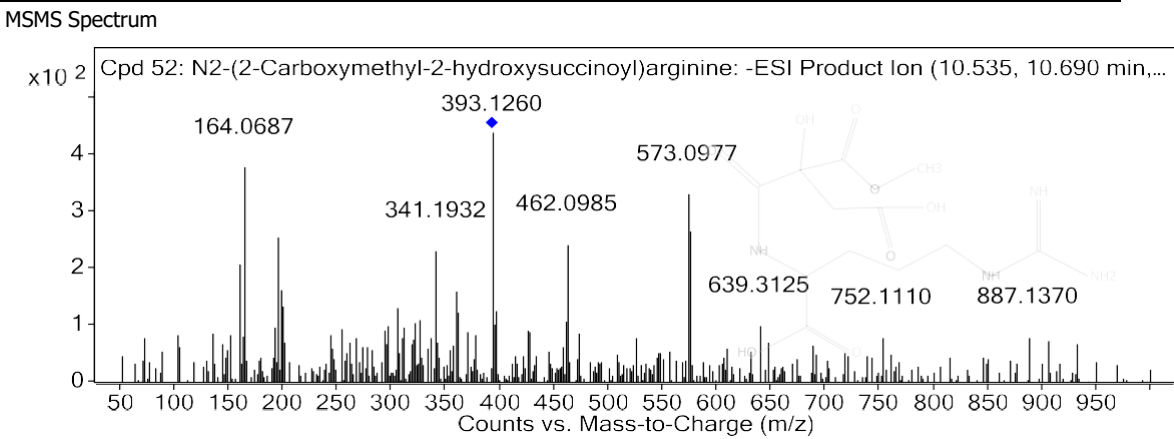

MS/MS Spectrum Peak List

| m/z      | z | Abund  |
|----------|---|--------|
| 160.8395 |   | 208.44 |
| 164.0687 |   | 377.53 |
| 195.8089 |   | 253.91 |
| 197.8066 |   | 162.37 |
| 341.1932 | 1 | 230.86 |
| 393.126  | 1 | 439.9  |
| 462.0985 |   | 242.45 |
| 573.0977 | 1 | 330.4  |
| 574.0958 | 1 | 161.19 |
| 575.0922 | 1 | 266.4  |

Compound Structure

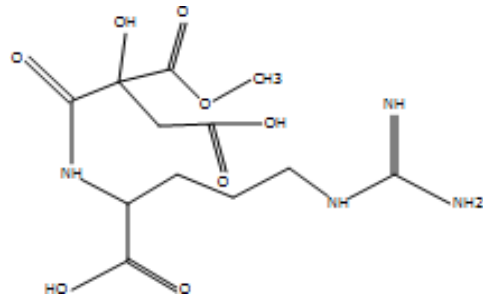

Qualitative Compound Report

38.9Z-Octadecenedioic acid

| Compound Label                  | Name                    | m/z      | RT     | Algorithm  | Mass     |
|---------------------------------|-------------------------|----------|--------|------------|----------|
| Cpd 54: 9Z-Octadecenedioic acid | 9Z-Octadecenedioic acid | 311.2204 | 11.488 | Auto MS/MS | 312.2278 |

MS Spectrum

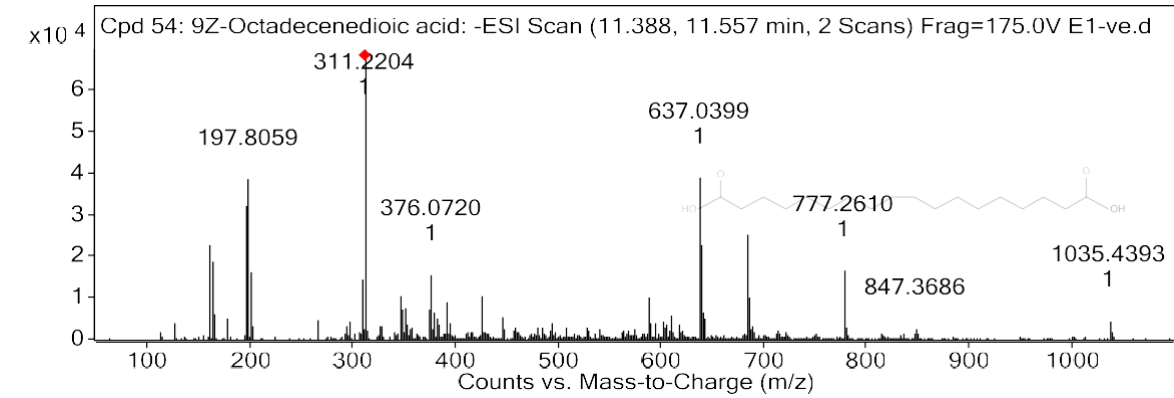

MS Zoomed Spectrum

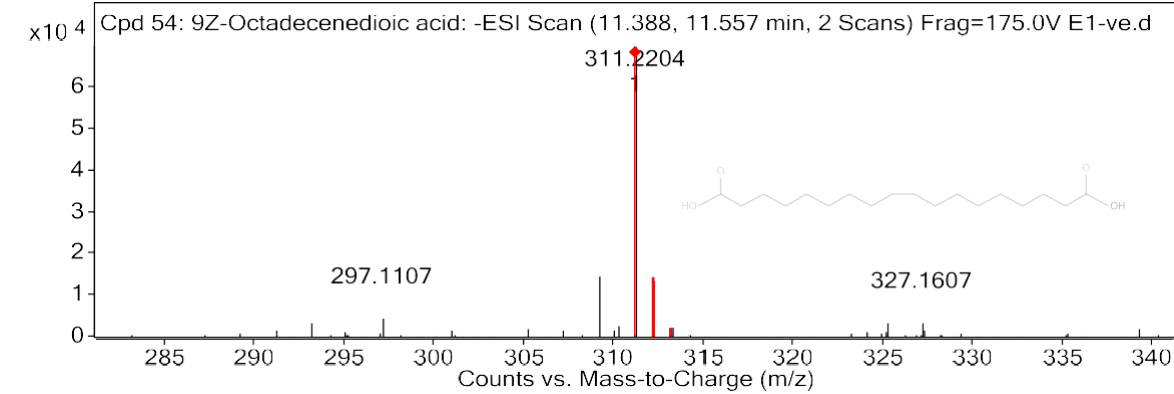

MS Spectrum Peak List

| m/z      | Calc m/z | Diff(ppm) | z | Abund    | Formula    | Ion    |
|----------|----------|-----------|---|----------|------------|--------|
| 160.8402 |          |           |   | 22955.96 |            |        |
| 162.8371 |          |           |   | 19055.45 |            |        |
| 195.8091 |          |           |   | 32525.24 |            |        |
| 197.8059 |          |           |   | 38851.21 |            |        |
| 311.2204 | 311.2228 | 7.75      | 1 | 69805.48 | C18 H32 O4 | (M-H)- |
| 312.2237 | 312.2262 | 8.14      | 1 | 13551.76 | C18 H32 O4 | (M-H)- |
| 313.2324 | 313.2288 | -11.4     | 1 | 2660.82  | C18 H32 O4 | (M-H)- |
| 637.0399 |          |           | 1 | 39222.22 |            |        |
| 639.0373 |          |           | 1 | 23161.78 |            |        |
| 683.302  |          |           | 1 | 25562.79 |            |        |

MSMS Spectrum

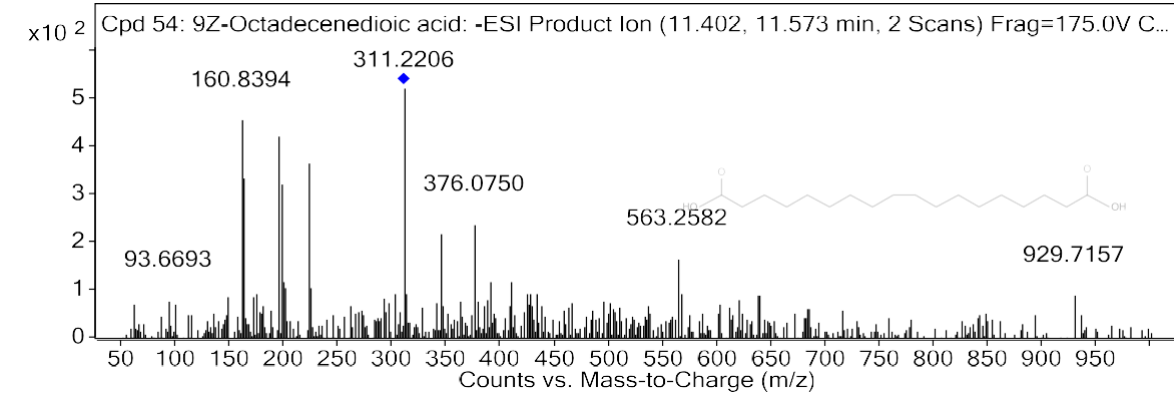

MS/MS Spectrum Peak List

| m/z      | z | Abund  |
|----------|---|--------|
| 160.8394 | 1 | 454.39 |
| 162.8356 | 1 | 332.82 |
| 195.8088 |   | 422.01 |
| 197.8047 |   | 320.16 |
| 223.1679 | 1 | 366.05 |
| 311.2206 | 1 | 521.87 |
| 345.1819 |   | 219.87 |
| 376.075  |   | 237.24 |
| 391.1796 |   | 118.57 |
| 563.2582 |   | 165.66 |

Compound Structure

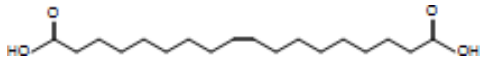

Qualitative Compound Report

39.Trilobolide

| Compound Label      | Name        | m/z      | RT     | Algorithm  | Mass     |
|---------------------|-------------|----------|--------|------------|----------|
| Cpd 55: Trilobolide | Trilobolide | 521.2495 | 12.359 | Auto MS/MS | 522.2548 |

MS Spectrum

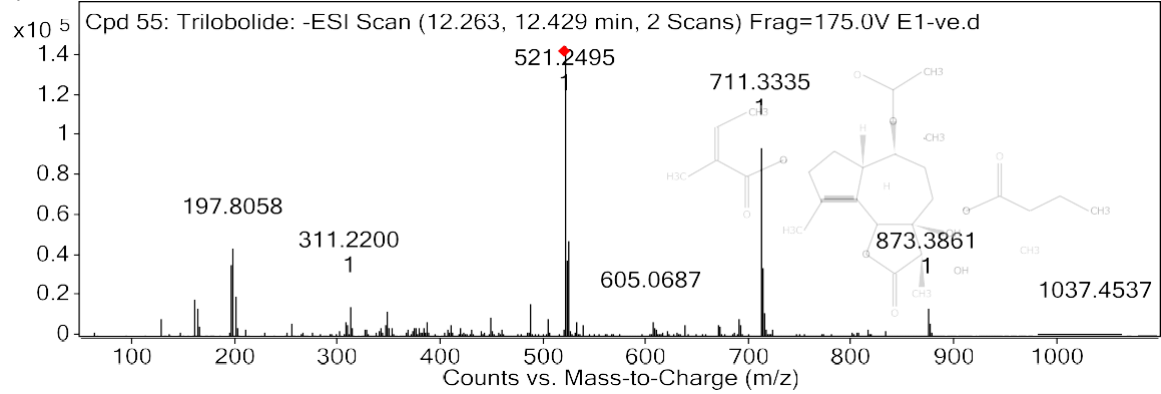

MS Zoomed Spectrum

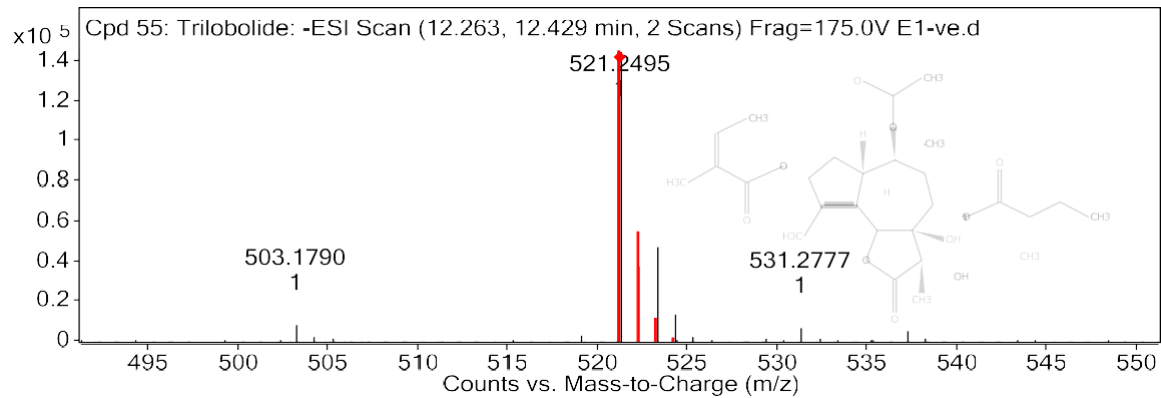

MS Spectrum Peak List

| m/z      | Calc m/z | Diff(ppm) | z | Abund     | Formula     | Ion    |
|----------|----------|-----------|---|-----------|-------------|--------|
| 195.8089 |          |           |   | 36085.02  |             |        |
| 197.8058 |          |           |   | 44332.73  |             |        |
| 521.2495 | 521.2392 | -19.74    | 1 | 145147.67 | C27 H38 O10 | (M-H)- |
| 522.2527 | 522.2426 | -19.34    | 1 | 38416.74  | C27 H38 O10 | (M-H)- |
| 523.2478 | 523.2452 | -4.89     | 1 | 47988.5   | C27 H38 O10 | (M-H)- |
| 524.2507 | 524.2479 | -5.36     | 1 | 13919.21  | C27 H38 O10 | (M-H)- |
| 525.2527 | 525.2504 | -4.24     | 1 | 3210      | C27 H38 O10 | (M-H)- |
| 711.3335 |          |           | 1 | 94000.06  |             |        |
| 712.3367 |          |           | 1 | 32261.55  |             |        |
| 713.3326 |          |           | 1 | 34625.62  |             |        |

MSMS Spectrum

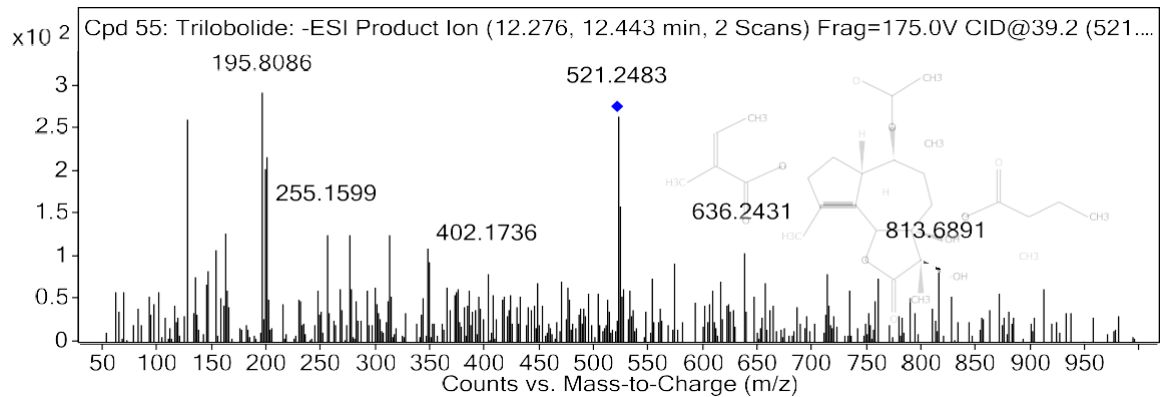

MS/MS Spectrum Peak List

| m/z      | z | Abund  |
|----------|---|--------|
| 126.9026 |   | 261.83 |
| 162.837  |   | 128.12 |
| 195.8086 |   | 293.54 |
| 197.8051 |   | 204    |
| 199.8036 |   | 217.77 |
| 255.1599 |   | 126.36 |
| 275.1985 |   | 125.54 |
| 312.5617 |   | 126.1  |
| 521.2483 | 1 | 264.92 |
| 523.2447 | 1 | 160.13 |

Compound Structure

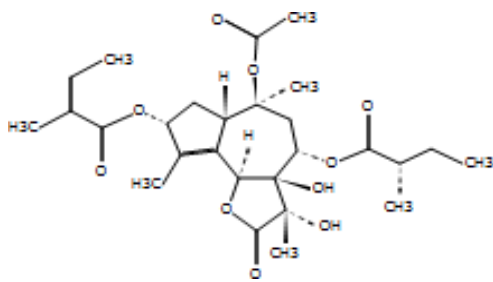

Qualitative Compound Report

40. Thalidasine

| Compound Label      | Name        | m/z      | RT     | Algorithm  | Mass     |
|---------------------|-------------|----------|--------|------------|----------|
| Cpd 56: Thalidasine | Thalidasine | 711.3339 | 12.591 | Auto MS/MS | 652.3179 |

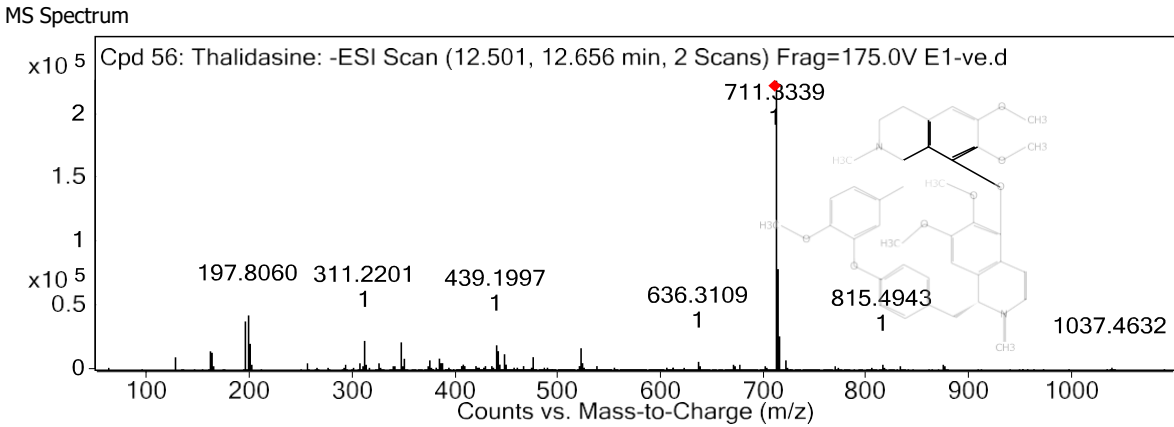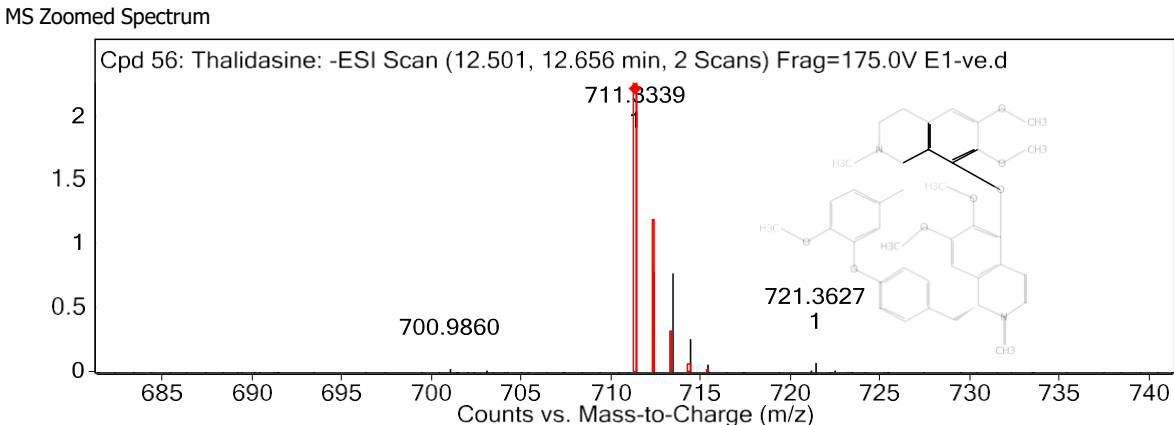

MS Spectrum Peak List

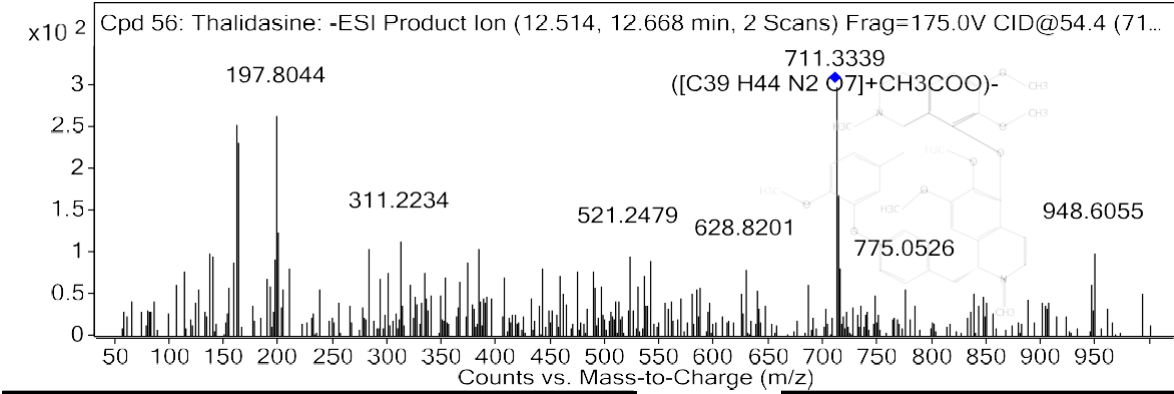

| m/z      | Calc m/z | Diff(ppm) | z | Abund     | Formula       | Ion         |
|----------|----------|-----------|---|-----------|---------------|-------------|
| 195.8088 |          |           |   | 38586.21  |               |             |
| 197.806  |          |           |   | 43683.27  |               |             |
| 199.8028 |          |           |   | 20773.66  |               |             |
| 311.2201 |          |           | 1 | 22966.23  |               |             |
| 347.1969 |          |           | 1 | 21853.04  |               |             |
| 711.3339 | 711.3287 | -7.23     | 1 | 226267.45 | C39 H44 N2 O7 | (M+CH3COO)- |
| 712.3368 | 712.332  | -6.8      | 1 | 79616     | C39 H44 N2 O7 | (M+CH3COO)- |
| 713.3329 | 713.3349 | 2.9       | 1 | 78079.98  | C39 H44 N2 O7 | (M+CH3COO)- |
| 714.3344 | 714.3377 | 4.69      | 1 | 27384.85  | C39 H44 N2 O7 | (M+CH3COO)- |
| 715.3391 | 715.3405 | 1.95      | 1 | 6524.22   | C39 H44 N2 O7 | (M+CH3COO)- |

MSMS Spectrum

MS/MS Spectrum Peak List

| m/z      | Calc m/z | Diff (ppm) | z | Abund  | Formula       | Ion         |
|----------|----------|------------|---|--------|---------------|-------------|
| 160.8399 |          |            |   | 254.03 |               |             |
| 162.8355 |          |            |   | 232.65 |               |             |
| 197.8044 |          |            |   | 263.73 |               |             |
| 199.8018 |          |            |   | 125.15 |               |             |
| 283.2629 |          |            |   | 104.83 |               |             |
| 311.2234 |          |            |   | 113.57 |               |             |
| 383.1716 |          |            |   | 105.5  |               |             |
| 711.3339 | 711.3287 | -7.33      |   | 298.85 | C39 H44 N2 O7 | (M+CH3COO)- |
| 712.3367 |          |            | 1 | 255.07 |               |             |
| 713.3417 |          |            | 1 | 169.51 |               |             |

Compound Structure

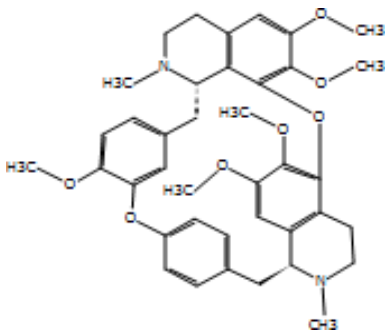

Qualitative Compound Report

41.α-Linolenic Acid

| Compound Label           | Name             | m/z      | RT     | Algorithm  | Mass     |
|--------------------------|------------------|----------|--------|------------|----------|
| Cpd 70: α-Linolenic Acid | α-Linolenic Acid | 277.2151 | 16.479 | Auto MS/MS | 278.2223 |

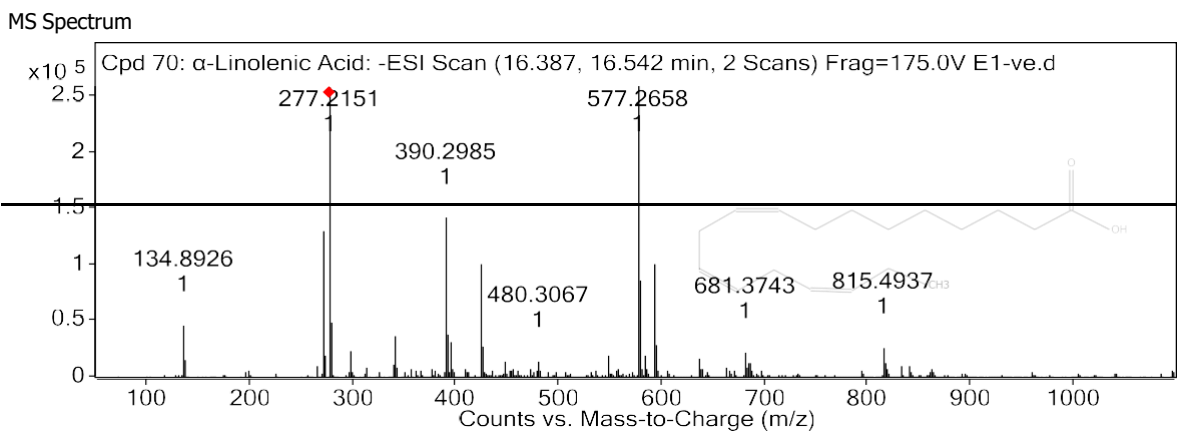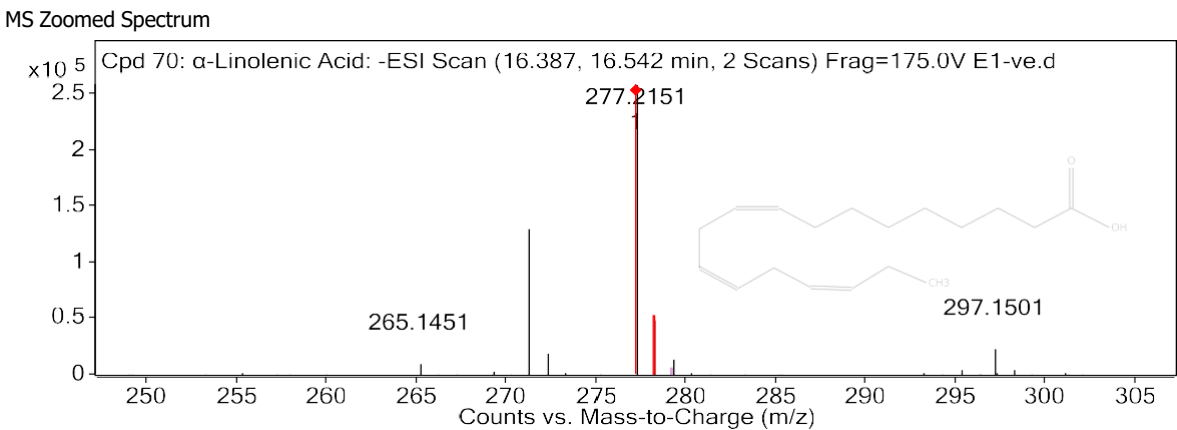

MS Spectrum Peak List

| m/z      | Calc m/z | Diff(ppm) | z | Abund     | Formula    | Ion    |
|----------|----------|-----------|---|-----------|------------|--------|
| 134.8926 |          |           | 1 | 46314.64  |            |        |
| 271.2256 |          |           | 1 | 129954.75 |            |        |
| 277.2151 | 277.2173 | 7.9       | 1 | 257980.06 | C18 H30 O2 | (M-H)- |
| 278.2182 | 278.2207 | 9.17      | 1 | 49375.91  | C18 H30 O2 | (M-H)- |
| 389.2439 |          |           | 1 | 54277.47  |            |        |
| 390.2985 |          |           | 1 | 141770.44 |            |        |
| 424.2827 |          |           | 1 | 101499.24 |            |        |
| 577.2658 |          |           | 1 | 284047.13 |            |        |
| 578.269  |          |           | 1 | 86347.5   |            |        |
| 593.27   |          |           | 1 | 101616.77 |            |        |

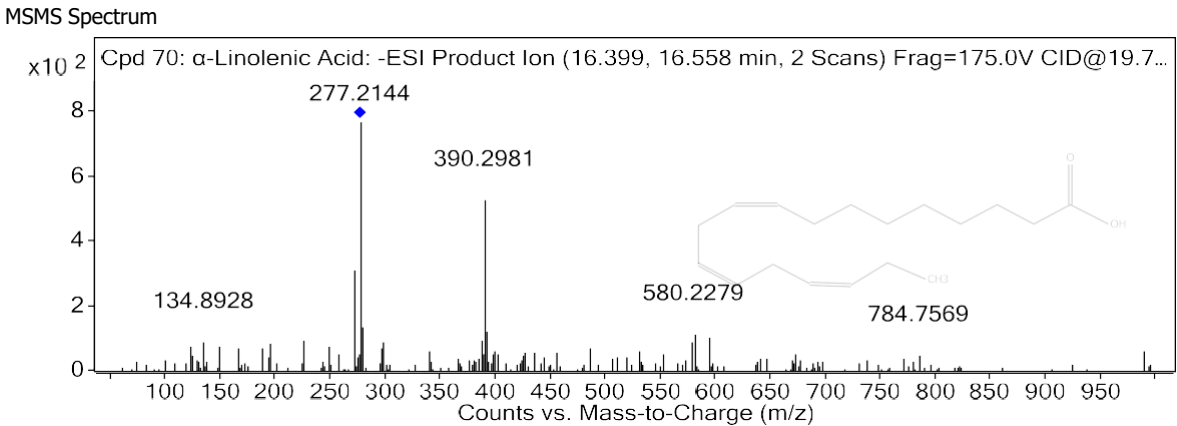

MS/MS Spectrum Peak List

| m/z      | z | Abund  |
|----------|---|--------|
| 225.2202 |   | 94.55  |
| 271.2266 | 1 | 314.39 |
| 277.2144 | 1 | 769.84 |
| 278.2162 | 1 | 124.57 |
| 279.2291 |   | 138.39 |
| 387.6397 |   | 95.94  |
| 390.2981 | 1 | 529.95 |
| 391.3039 | 1 | 122.57 |
| 580.2279 |   | 115.86 |
| 593.2618 |   | 104.77 |

Compound Structure

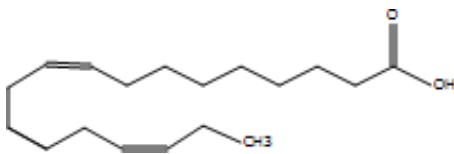



Qualitative Compound Report

42.16-Hydroxy hexadecanoic acid

| Compound Label                       | Name                         | m/z      | RT     | Algorithm  | Mass     |
|--------------------------------------|------------------------------|----------|--------|------------|----------|
| Cpd 71: 16-Hydroxy hexadecanoic acid | 16-Hydroxy hexadecanoic acid | 271.2256 | 16.487 | Auto MS/MS | 272.2328 |

MS Spectrum

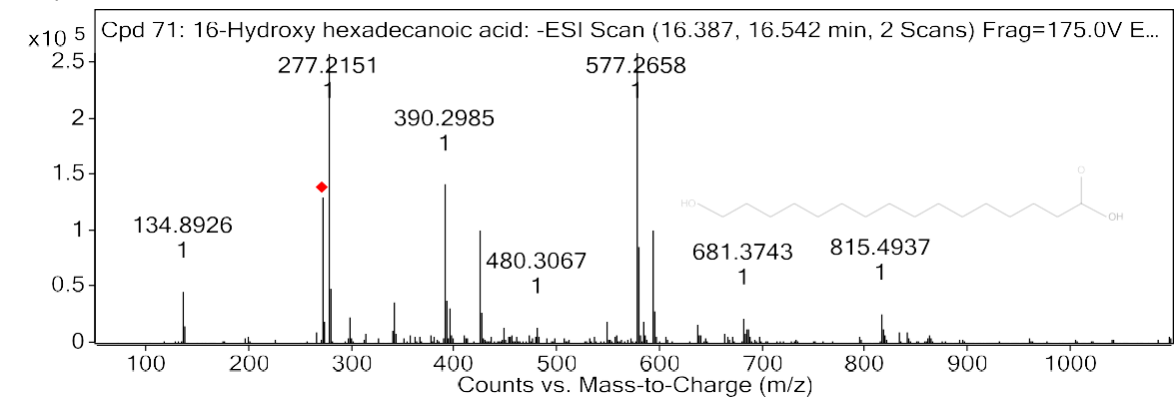

MS Zoomed Spectrum

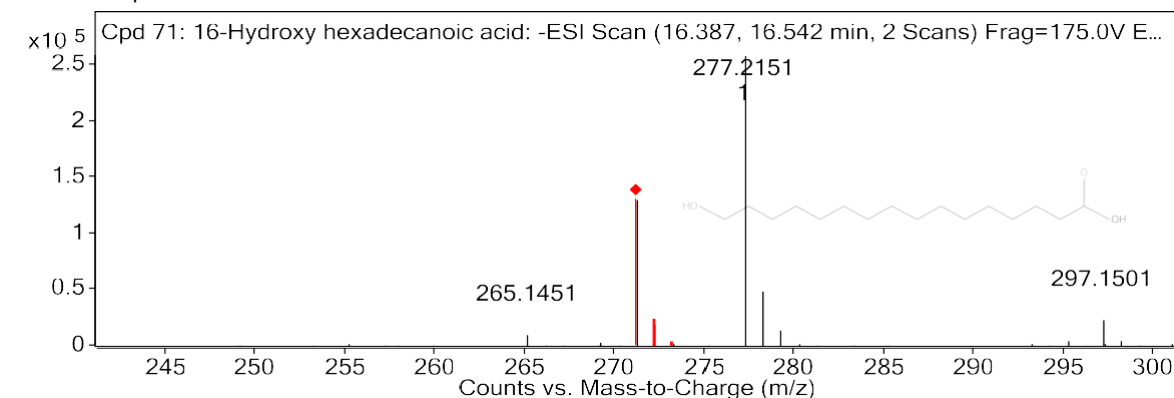

MS Spectrum Peak List

| m/z      | Calc m/z | Diff(ppm) | z | Abund     | Formula    | Ion    |
|----------|----------|-----------|---|-----------|------------|--------|
| 271.2256 | 271.2279 | 8.34      | 1 | 129954.75 | C16 H32 O3 | (M-H)- |
| 272.2286 | 272.2313 | 9.85      | 1 | 19627.7   | C16 H32 O3 | (M-H)- |
| 273.2315 | 273.234  | 9.09      | 1 | 2900.26   | C16 H32 O3 | (M-H)- |
| 277.2151 |          |           | 1 | 257980.06 |            |        |
| 389.2439 |          |           | 1 | 54277.47  |            |        |
| 390.2985 |          |           | 1 | 141770.44 |            |        |
| 424.2827 |          |           | 1 | 101499.24 |            |        |
| 577.2658 |          |           | 1 | 284047.13 |            |        |
| 578.269  |          |           | 1 | 86347.5   |            |        |
| 593.27   |          |           | 1 | 101616.77 |            |        |

MSMS Spectrum

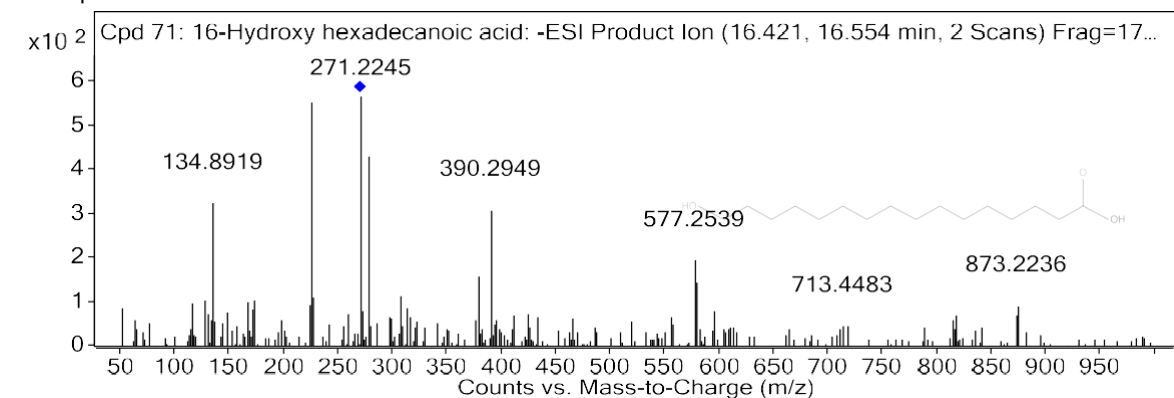

MS/MS Spectrum Peak List

| m/z      | z | Abund  |
|----------|---|--------|
| 134.8919 |   | 325.8  |
| 225.221  | 1 | 553.72 |
| 226.2219 | 1 | 112.36 |
| 271.2245 | 1 | 568.44 |
| 277.2134 | 1 | 430.13 |
| 307.1712 |   | 114.16 |
| 379.218  |   | 159.66 |
| 390.2949 |   | 310.79 |
| 577.2539 |   | 195.57 |
| 578.2731 |   | 146.9  |

Compound Structure

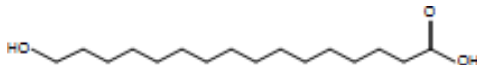



Qualitative Compound Report

43.4-(3-Hydroxy-7-phenyl- 6-heptenyl)-1,2- benzenediol

| Compound Label                                            | Name                                              | m/z      | RT     | Algorithm  | Mass     |
|-----------------------------------------------------------|---------------------------------------------------|----------|--------|------------|----------|
| Cpd 75: 4-(3-Hydroxy-7-phenyl-6-heptenyl)-1,2-benzenediol | 4-(3-Hydroxy-7-phenyl-6-heptenyl)-1,2-benzenediol | 297.1505 | 17.381 | Auto MS/MS | 298.1575 |

MS Spectrum

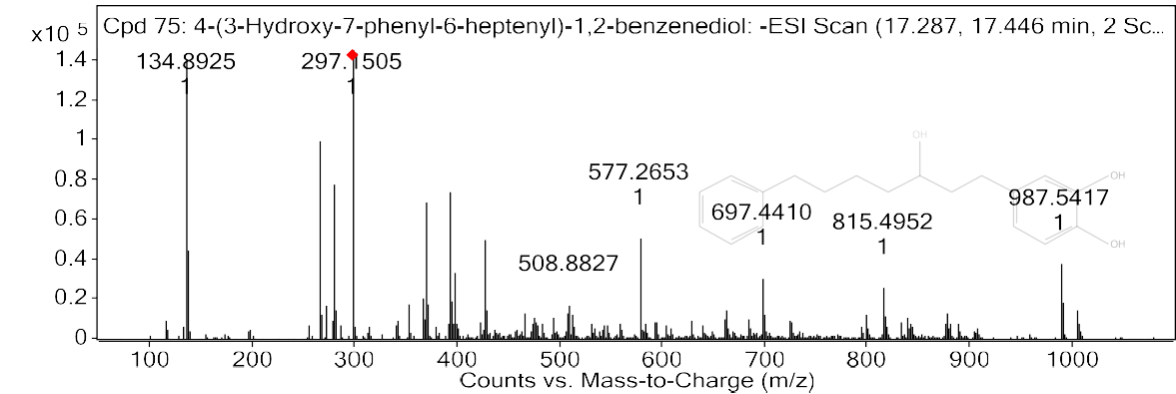

MS Zoomed Spectrum

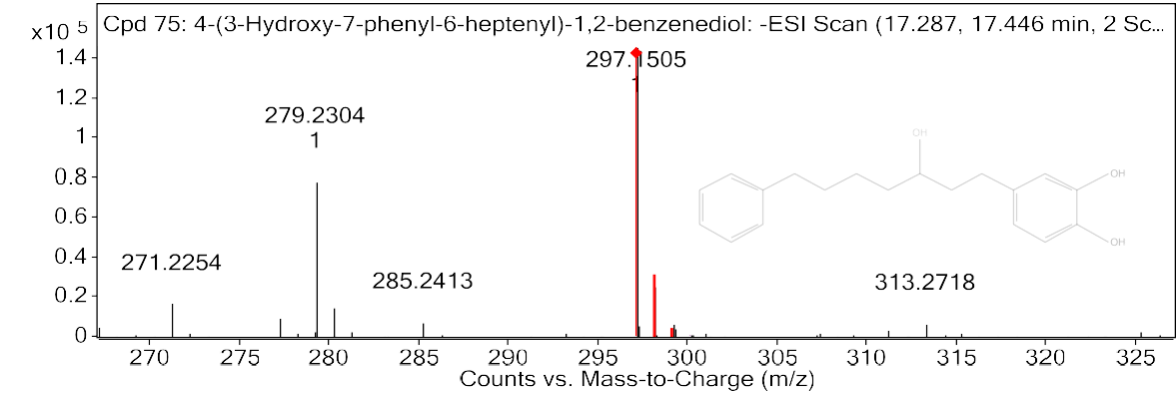

MS Spectrum Peak List

| m/z      | Calc m/z | Diff(ppm) | z | Abund     | Formula    | Ion    |
|----------|----------|-----------|---|-----------|------------|--------|
| 134.8925 |          |           | 1 | 140829.13 |            |        |
| 265.1454 |          |           | 1 | 99959.23  |            |        |
| 279.2304 |          |           | 1 | 78788.25  |            |        |
| 297.1505 | 297.1496 | -2.89     | 1 | 146295.66 | C19 H22 O3 | (M-H)- |
| 298.1538 | 298.153  | -2.68     | 1 | 25605.02  | C19 H22 O3 | (M-H)- |
| 299.1496 | 299.1558 | 20.86     | 1 | 6935.89   | C19 H22 O3 | (M-H)- |
| 369.2983 |          |           | 1 | 69205.64  |            |        |
| 392.3142 |          |           | 1 | 74955.22  |            |        |
| 426.2982 |          |           | 1 | 50642.21  |            |        |
| 577.2653 |          |           | 1 | 51199.57  |            |        |

MS/MS Spectrum

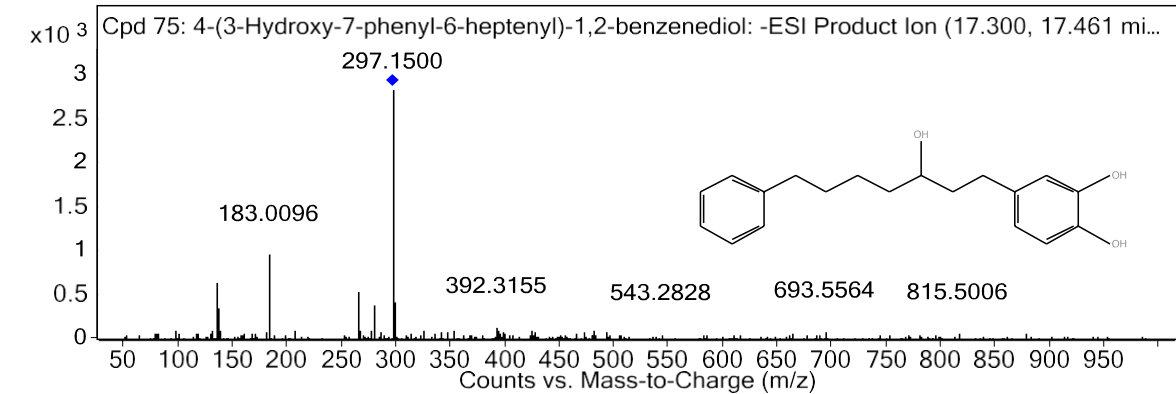

MS/MS Spectrum Peak List

| m/z      | z | Abund   |
|----------|---|---------|
| 134.8928 | 1 | 644.42  |
| 136.8894 | 1 | 361.95  |
| 138.8885 |   | 109.84  |
| 183.0096 | 1 | 961.88  |
| 184.0184 | 1 | 114.67  |
| 265.1427 | 2 | 548.47  |
| 279.2287 |   | 397.34  |
| 297.15   | 1 | 2839.11 |
| 298.1548 | 1 | 427.45  |
| 392.3155 |   | 139.27  |

Compound Structure

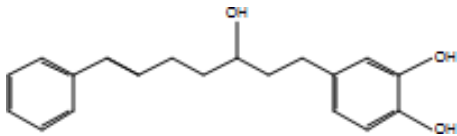

Qualitative Compound Report

44.(6beta,8betaOH)-6,8-Dihydroxy-7(11)- eremophilen-12,8- olide

| Compound Label                                                     | Name                                                       | m/z      | RT     | Algorithm  | Mass     |
|--------------------------------------------------------------------|------------------------------------------------------------|----------|--------|------------|----------|
| Cpd 76: (6beta,8betaOH)-6,8-Dihydroxy-7(11)-eremophilen-12,8-olide | (6beta,8betaOH)-6,8-Dihydroxy-7(11)-eremophilen-12,8-olide | 265.1458 | 17.524 | Auto MS/MS | 266.1527 |

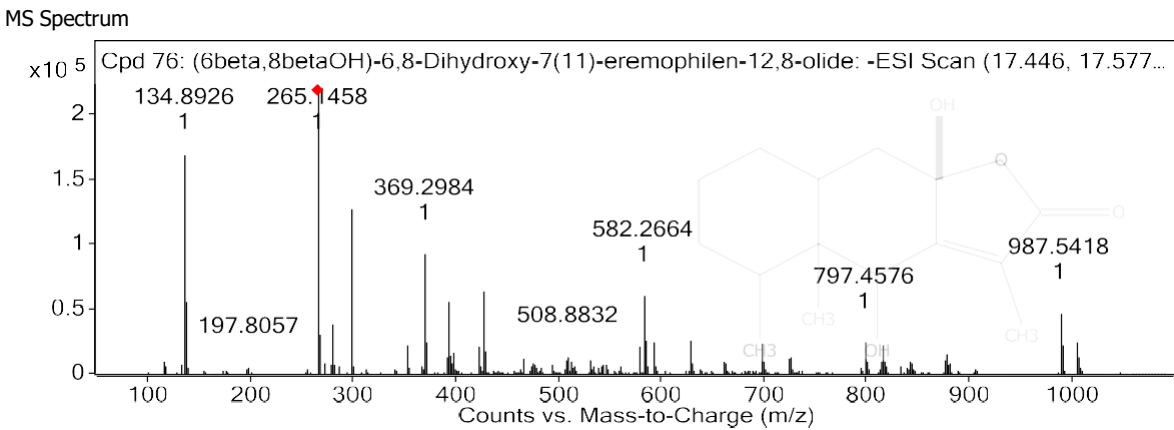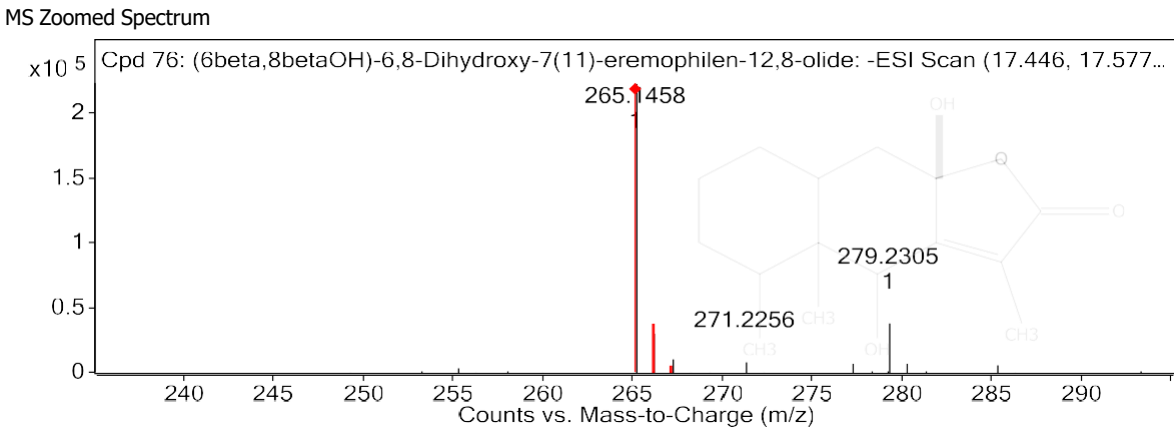

MS Spectrum Peak List

| m/z      | Calc m/z | Diff(ppm) | z | Abund     | Formula    | Ion    |
|----------|----------|-----------|---|-----------|------------|--------|
| 134.8926 |          |           | 1 | 169243.72 |            |        |
| 136.8897 |          |           | 1 | 55966.19  |            |        |
| 265.1458 | 265.1445 | -4.73     | 1 | 223387.05 | C15 H22 O4 | (M-H)- |
| 266.1487 | 266.1479 | -2.83     | 1 | 30791.45  | C15 H22 O4 | (M-H)- |
| 267.145  | 267.1504 | 20.18     | 1 | 11087.63  | C15 H22 O4 | (M-H)- |
| 297.1505 |          |           | 1 | 127708.8  |            |        |
| 369.2984 |          |           | 1 | 93393.69  |            |        |
| 392.3143 |          |           | 1 | 56480.8   |            |        |
| 426.2985 |          |           | 1 | 64310.85  |            |        |
| 582.2664 |          |           | 1 | 61171.13  |            |        |

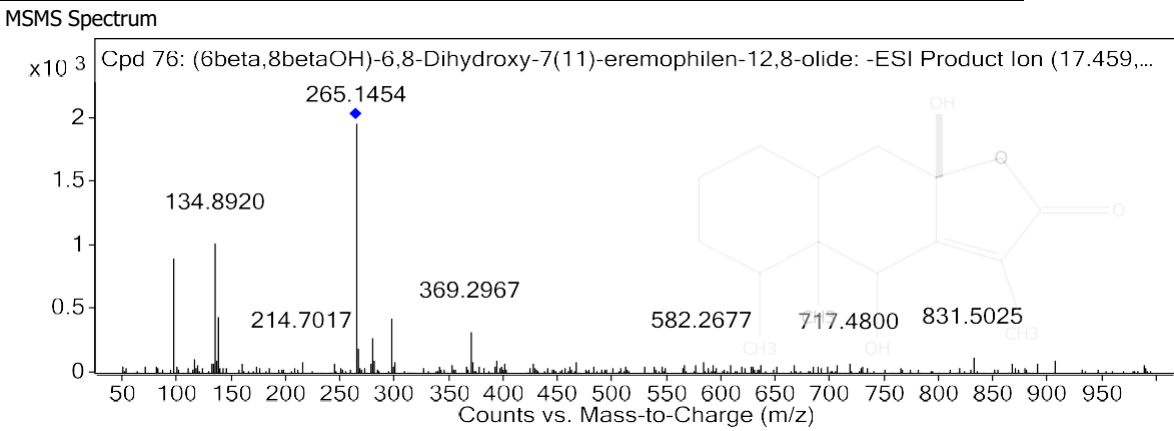

MS/MS Spectrum Peak List

| m/z      | z | Abund   |
|----------|---|---------|
| 96.9583  |   | 909.2   |
| 115.9172 |   | 120.27  |
| 134.892  | 1 | 1022.72 |
| 136.8889 | 1 | 446.57  |
| 265.1454 | 1 | 1962.41 |
| 266.1458 | 1 | 201.54  |
| 279.2306 | 1 | 282.94  |
| 297.1508 |   | 430.91  |
| 369.2967 | 1 | 328.53  |
| 831.5025 |   | 123.92  |

Compound Structure

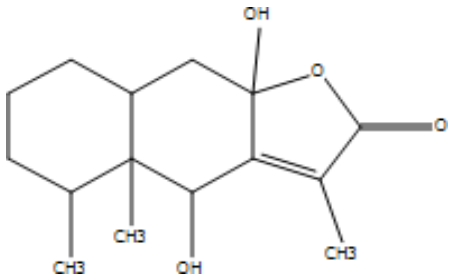

## Qualitative Compound Report

---

## References:

1. Gulfraz, M.; Sadiq, A.; Tariq, H.; Imran, M.; Qureshi, R., Phytochemical analysis and antibacterial activity of *Eruca sativa* seed. *Pakistan Journal of Botany* **2011**, 43, 1351-1359.
2. Uğur, A.; Süntar, I.; Aslan, S.; Orhan, I. E.; Kartal, M.; Sekeroğlu, N.; Eşiyok, D.; Sener, B., Variations in fatty acid compositions of the seed oil of *Eruca sativa* Mill. caused by different sowing periods and nitrogen forms. *Pharmacogn Mag* **2010**, 6 (24), 305-308.
3. Jirovetz, L.; Smith, D.; Buchbauer, G., Aroma compound analysis of *Eruca sativa* (Brassicaceae) SPME headspace leaf samples using GC, GC-MS, and olfactometry. *Journal of agricultural and food chemistry* **2002**, 50 (16), 4643-6.
4. Abdul-Jalil, T. Z. In *Phytochemicals Screening by GC / MS and Determination of Some Flavonol in Cultivated Iraqi Eruca sativa Dried Leaves Extract and its Biological Activity as Antioxidant*, 2016.
5. Villatoro-Pulido, M.; Priego-Capote, F.; Álvarez-Sánchez, B.; Saha, S.; Philo, M.; Obregón-Cano, S.; De Haro-Bailón, A.; Font, R.; Del Río-Celestino, M., An approach to the phytochemical profiling of rocket [*Eruca sativa* (Mill.) Thell]. *Journal of the science of food and agriculture* **2013**, 93 (15), 3809-19.
6. Michael, H.; Shafik, R.; Rasmy, G., Studies on the chemical constituents of fresh leaf of *Eruca sativa* extract and its biological activity as anticancer agent in vitro. *Journal of Medicinal Plants Research* **2011**, 5, 1184-1191.
7. S.A., H., Phytochemical study of some medicinal compounds present in *Hedera helix* L. plant cultivated in Iraq. *M Sc. thesis Baghdad University* **2014**, 20.
8. Blažević, I.; Mastelić, J., Free and bound volatiles of rocket (*Eruca sativa* Mill.). *Flavour and Fragrance Journal* **2008**, 23 (4), 278-285.
